1  
2  
3  
4  
5  
6  
7  
8  
9  
10  
11  
12  
13  
14  
15  
16  
17  
18  
19

Long-term changes in kelp forests in an inner basin of the Salish Sea

Helen D. Berry<sup>1\*</sup>, Thomas F. Mumford<sup>2</sup>, Bart Christiaen<sup>1</sup>, Pete Dowty<sup>1</sup>, Max Calloway<sup>1</sup>, Lisa Ferrier<sup>1</sup>, Eric E. Grossman<sup>3</sup>, Nathan R. VanArendonk<sup>3</sup>

<sup>1</sup>Washington State Department of Natural Resources, Olympia, WA, United States of America

<sup>2</sup>Marine Agronomics LLC, Olympia, WA United States of America

<sup>3</sup>U.S. Geological Survey, Pacific Coastal and Marine Science Center, Santa Cruz, CA, United States of America

\* Corresponding author

E-mail: [helen.berry@dnr.wa.gov](mailto:helen.berry@dnr.wa.gov) (HB)

Keywords (4-6): kelp, *Nereocystis luetkeana*, Laminariales, biogenic habitat, habitat loss, kelp, historical ecology

## 20 **Abstract**

21           Understanding the historical extent of biogenic habitats can provide insight into the nature  
22 of human impacts and inform restoration and conservation actions. Kelp forests form an  
23 important biogenic habitat that responds to natural and human drivers. Global concerns exist  
24 about threats to kelp forests, yet long term information is limited and research suggests that  
25 trends are geographically distinct. We examined distribution of the bull kelp *Nereocystis*  
26 *luetkeana* over 145 years in South Puget Sound (SPS), a semi-protected inner basin in a fjord  
27 estuary complex in the northeast Pacific Ocean. We synthesized 48 historical and modern  
28 *Nereocystis* surveys and examined presence/absence within 1-km shoreline segments along 452  
29 km of shoreline. Over the last 145 years, *Nereocystis* has been documented in 26% of the  
30 shoreline segments. Its extent decreased 62% basin-wide between the 1870s and 2017, with  
31 extreme losses in the two out of three sub-basins (96% in Central and 83% in West). In recent  
32 years, almost all *Nereocystis* occurred in the East sub-basin. In the majority of segments where  
33 *Nereocystis* disappeared, the most recent observation was 4 decades ago, or earlier. Multiple  
34 natural and human factors that are known to impact kelp could have contributed to observed  
35 patterns, but limited data exist at the spatial and temporal scale of this study. In some areas,  
36 recent environmental conditions approached thresholds associated with decreased kelp  
37 performance. Longstanding *Nereocystis* losses occurred exclusively in areas with relatively low  
38 current velocities. Remaining *Nereocystis* predominantly occurred in areas where circulation is  
39 stronger. Exceptions to this pattern demonstrate that additional factors outside the scope of this  
40 study contributed to trajectories of *Nereocystis* persistence or loss.

## 41 **Introduction**

42 Humans have altered coastal ecosystems for centuries, yet we frequently lack long-term  
43 datasets to define a baseline that precedes significant human impacts and to identify changes  
44 from that baseline. The need for long-term reference points was initially identified in the context  
45 of global fisheries [1], but it is equally important to understand changes in biogenic habitats as  
46 losses can trigger changes to broader ecosystem structure and services. Historical maps have  
47 been used to estimate changes in the spatial extent of coastal habitats such as salt marshes, oyster  
48 reefs, coral reefs and kelp forests over century time scales [2-5]. Extended temporal baselines  
49 can enhance understanding of habitat variability and change. For example, historical nautical  
50 charts were used to spatially and temporally extend baseline information for coral reef extent in  
51 the Florida Keys, revealing greater loss than was previously quantified, along with newly  
52 identified areas of intact offshore reefs [4]. Enhanced understanding of the magnitude and spatial  
53 patterns of change in biogenic habitats can guide restoration and conservation actions, inform  
54 research into stressors, and support evaluation of changes to species that rely on these habitats.

55 Kelp forests occur predominantly in temperate oceans. They provide habitat for a wide  
56 range of species, especially invertebrate and fish assemblages [6]. Kelp forests are considered  
57 ecosystem engineers [7] because they create structural habitat with distinct local conditions by  
58 modifying the physical environment, such as light, water flow, sedimentation and pH [8, 9].  
59 Extremely high productivity rates create habitat and food for local and distant food webs [10,  
60 11]. Because kelp generally requires cold and nutrient-rich water [12, 13], large-scale climate  
61 cycles or changes can influence kelp abundance [5, 14, 15]. Grazing from herbivores also  
62 strongly influences kelp distribution and abundance [16], especially when changes in predator  
63 populations trigger linked changes in grazers [6, 17, 18].

64           Recent kelp forest losses across the globe have generated widespread concern. A  
65 worldwide synthesis found that 38% of kelp forests declined over the last five decades [19].  
66 Areas of stability and increase exist, suggesting that in addition to regional climatic trends, local  
67 stressors can dominate kelp dynamics. Widespread human activities can impact kelp, including  
68 development, agriculture, and forestry [7]. In the last decade, kelp declines and shifts from  
69 systems dominated by kelp to turf-forming algae have been documented in Asia, Australia,  
70 Europe, North America and South America (reviewed in [20]). Researchers have identified  
71 warming [13, 21], eutrophication [22], acidification [23], changes to community structure [18]  
72 and sedimentation [24] as contributing factors that often interact. Other known threats include  
73 harvest, pathogens, and non-native algal species [25]. As awareness of losses grows along with  
74 predictions for future losses associated with climate warming, scientists and managers have  
75 identified a pressing need for better baseline information to provide context for past and  
76 predicted environmental changes [26, 27] and to determine the extent to which changes are  
77 related to human activities.

78           The Salish Sea is an extensive fjord estuary complex in the northeast Pacific Ocean,  
79 spanning the United States and Canada (Fig 1), and two ecoregions [28]. The marine shorelines  
80 in the Salish Sea and adjacent exposed coastline support 22 species of kelp [29] with the greatest  
81 abundance and diversity found along the western Strait of Juan de Fuca and exposed Pacific  
82 Ocean coast [5, 29]. While kelp is less abundant in the inner basins of the fjord complex, the  
83 understory kelp *Saccharina latissima* and the canopy-forming bull kelp *Nereocystis luetkeana*  
84 (hereafter *Nereocystis*) are common [30-32] where appropriate habitat conditions exist, such as  
85 coarse substrates in the shallow subtidal zone for holdfast attachment.

86

87 **Fig 1. The South Puget Sound study area and three analysis sub-basins (West, Central and East).**  
88 Marine waters in South Puget Sound (SPS) study area are depicted in white, terrestrial areas are shown in  
89 gray and marine areas outside the study boundary are shown in light gray. The -6.1 m bathymetric  
90 contour line denotes all shorelines where *Nereocystis* was observed to be present between 1873 and 2018,  
91 classified to reflect the year of the most recent observation of presence. Years were binned into 20-year  
92 increments, with two bins excluded due to lack of data. The general location of the sub-basins is  
93 demarcated at the bottom of the figure, with precise boundaries identified by dotted gray lines on the map.  
94

95 *Nereocystis* occurs from the Aleutian Islands, AK to Point Conception, CA [33] in a wide  
96 range of habitats, from fully wave-exposed to moderately wave-protected shorelines [34]. In the  
97 inland waters of the Salish Sea, *Nereocystis* is the sole species of kelp that forms a floating  
98 surface canopy. The familiar sporophyte phase of *Nereocystis* is primarily an annual, with a  
99 holdfast that attaches to coarse substrates, a long stipe connected to a terminal buoyant bulb, and  
100 blades that proliferate on the water surface. The sporophyte has an obligatory alternate phase, a  
101 microscopic gametophyte, whose ecology is poorly understood and may be vulnerable to  
102 different environmental factors than the macroscopic sporophyte [12, 35, 36]. Limited research  
103 has shown that *Nereocystis* populations within Puget Sound are genetically distinct from  
104 populations on the exposed coast [37], and they host a distinct microbiome [38].

105 The Salish Sea was excluded from recent global analyses of kelp trends due to limited  
106 scientific studies [6, 19]. In adjacent regions along the open Pacific Ocean coast of Washington  
107 and British Columbia, kelp abundance has been highly variable and yet stable over a century-  
108 scale [5, 19, 39]. An exception to this general pattern is seen in the eastern extreme of the Strait  
109 of Juan de Fuca, where declines occurred along the shorelines furthest within the Salish Sea and

110 most distant from the open coast [5]. Divergent trends in kelp abundance have been noted in  
111 adjacent areas associated with distinct local oceanography and human uses in many regions,  
112 including British Columbia [40], Nova Scotia [13], Maine [18] and western Norway [22].

113 Environmental conditions within the Salish Sea differ from areas close to the open ocean  
114 in ways that impact kelp performance. There is a general gradient from the ocean into the Salish  
115 Sea of decreasing wave exposure, increasing summer water temperatures, decreasing summer  
116 nutrient concentrations, and increasing human development [40-43]. South Puget Sound (SPS) is  
117 the most distant basin in Puget Sound from oceanic influence and it naturally experiences lower  
118 flushing rates and longer water residence times, which make it particularly sensitive to water  
119 quality degradation [43, 44]. Human activities impact water conditions in SPS through point and  
120 non-point pollution sources associated with regional development in the SPS watershed, as well  
121 as in nearby Central Puget Sound [45].

122 Diverse data sources have noted the occurrence of *Nereocystis* in SPS since European  
123 exploration began in the mid-1800s. Historically, kelp surface canopies were charted as an aid to  
124 navigation [46]. More recently, surface canopies have been surveyed for environmental  
125 monitoring and resource management [47]. In addition to these canopy-focused studies, dive-  
126 based ecological studies (ie., [32]) quantified density and other metrics for *Nereocystis* over  
127 more limited spatial scales.

128 Here, we synthesize diverse historical and modern data sources in order to understand  
129 spatiotemporal patterns in *Nereocystis* in the SPS. Specifically, we address: 1) What was  
130 baseline *Nereocystis* distribution prior to widespread European settlement? 2) During the past  
131 century and a half of European development, what were the patterns of *Nereocystis* persistence,  
132 loss, and gain? 3) How are historical and recent *Nereocystis* distribution related to environmental

133 characteristics that influence kelp performance, such as water temperature, nutrient  
134 concentrations and wave/current energy?

135 Like other syntheses of diverse historical datasets (i.e., [22, 48]), the primary purpose of  
136 our assessment is to describe changes over time. While we cannot draw conclusions about the  
137 causes of observed changes, we can place results in the context of regional data characterizing  
138 known kelp stressors to draw inferences about some likely stressors. Improved understanding of  
139 the historical extent of kelp and patterns of change could support further research into stressors  
140 and target restoration and conservation actions. It could also increase our understanding of  
141 dynamics in the organisms that rely on these habitats.

142

## 143 **Methods**

### 144 **Study System**

145 The study area is South Puget Sound (SPS), a 425 km<sup>2</sup> water body located at the southern  
146 terminus of Puget Sound (Fig1), which is part of the larger Salish Sea fjord estuary complex [41,  
147 42, 49]. SPS connects to the northeast Pacific Ocean through a network of basins and sills. While  
148 individual basins exhibit distinct oceanographic properties [50], all generally exhibit steadily  
149 increasing water residency, stratification, and primary production with distance into the fjord.  
150 Tidal currents and estuarine circulation primarily drive water flow and mixing. In SPS, the most  
151 intense currents and regular (daily) mixing occur at the Tacoma Narrows, a narrow 1.5 km  
152 channel with a shallow sill (45 m) that connects SPS to the rest of Puget Sound. SPS is relatively  
153 protected from wave exposure, ranging from semi-protected to very protected in the regional  
154 shoreline classification dataset called the ShoreZone Inventory [51].

155 SPS has complex shorelines composed of islands, passages, and shallow inlets. Due to the  
156 area's glacial origin, gravel, sand, and mixed fine substrates from eroded glacial till and outwash  
157 predominate in the intertidal and shallow subtidal zones [30, 52]. Mixed coarse substrates are  
158 found along shorelines with strong currents and relatively long fetch. Tideflats of mud and/or  
159 sand predominate at the heads of the inlets and other shallow embayments [30, 41].

160 Archaeological remains show that native people have inhabited the region for more than  
161 12,000 years[53]. European settlement in Puget Sound began in SPS in the 1820s, with  
162 establishment of a Hudson's Bay Company post at Fort Nisqually for fur-trading and agriculture.  
163 Population expansion began in the late 1800s, growing from 304 non-native people censused  
164 north of the Columbia River in 1849 to 23,955 in 1870 [54]. SPS contained the largest  
165 population in the Puget Sound region in 1870, with 1,557 non-native settlers censused in  
166 Olympia and Tumwater. After 1870, population growth and density in the Central Puget Sound  
167 cities of Seattle and Tacoma outpaced SPS. The Puget Sound region is now extensively  
168 urbanized, with a regional population of more than 4 million in 2019 [55]. A number of human  
169 activities have impacted natural systems since European settlement began, with lumber  
170 production dominating economic activity during the majority of this period. The first sawmill in  
171 Puget Sound began operating in 1847 in Tumwater (near Olympia). Initially, trees were felled  
172 along the marine shorelines and rivers and floated to mills [56]. In the 1880s, logging activities  
173 spread away from waterways to uncut timber accessed by newly built railroad lines. Logging  
174 activities expanded rapidly and Washington become the leading state in lumber production in  
175 1905 [57]. Other important economies in SPS have included fishing, agriculture and aquaculture.  
176 In recent decades, impacts associated with urbanization predominate. Development has brought  
177 extensive nearshore habitat loss and degradation [58], with attendant water quality issues



178 pertaining to anthropogenic nutrient loads and common contaminants from urban, industrial and  
179 agricultural runoff.

## 180 **Kelp survey data synthesis**

181 We compiled 48 individual data sources that noted the presence or absence of *Nereocystis*  
182 in SPS, including peer-reviewed publications, maps, navigation charts, reports and field surveys  
183 [30, 32, 59-103]. We limited our analysis to data sources that were recorded in field notes,  
184 reports and publications. The datasets spanned from 1873 to 2018 and were produced for a wide  
185 range of purposes, including navigation, harvest, resource management, land use planning, and  
186 ecological research. The spatial extent of data sources varied from a single location to the entire  
187 study area. The format and level of detail also varied widely, including text descriptions of  
188 presence or absence at a location, generalized cartographic symbols, detailed delineations of bed  
189 perimeter, and phycological studies which examined detailed plant metrics such as density and  
190 phenology. When multiple versions of a data source existed, we chose the most detailed field  
191 survey in preference to the final product, which was often edited for cartographic presentation.  
192 For example, we selected the hydrographic sheets [59] and the accompanying descriptive reports  
193 used to create the navigation charts, whenever available. For the Coast Pilot, which was updated  
194 gradually over time, records were grouped into three time periods (1889, 1926, 1951) following  
195 the methods of Thom and Hallum [67, 70, 86]. In five cases, original data sources were  
196 unrecoverable, so we drew data from a compilation of historical data sets [61, 66, 68, 93, 104].

197 We selected a data synthesis approach to accommodate diverse datasets and also recognize  
198 two major known sources of uncertainty that limit the precision of *Nereocystis* canopy  
199 observations. First, canopy-forming kelp exhibits high inter-annual variability in extent [5, 105],

200 so a single delineation will generally be a less representative measure of multi-year conditions  
201 than for slower growing, longer lived biogenic habitats like coral reefs. Second, tides and  
202 currents affect the extent of the *Nereocystis* canopy that is visible on the water surface over short  
203 time periods (hours) in this region [106]. These limitations called for a synthesis approach that  
204 generalized *Nereocystis* observations to the most comparable format.

205 We developed a linear model to represent *Nereocystis* presence along the shoreline  
206 because the majority of sources depicted the approximate location of *Nereocystis* along the  
207 shoreline, rather than precisely delineating the canopy footprint. The linear model captured the  
208 common narrow, fringing bed morphology of *Nereocystis* along the SPS shorelines. We selected  
209 a -6.1 m (MLLW) bathymetric contour line because it represents a generalized maximum depth  
210 of *Nereocystis* beds in SPS and more consistently reflects the linear extent of available  
211 *Nereocystis* habitat than intertidal contour lines. A relatively high-quality -6.1 m (MLLW) digital  
212 isobath exists, derived from gridded bathymetric data [107].

213 For all mapped surveys, we transferred information on survey extent and kelp presence  
214 from individual data sources to the common bathymetric contour in a geospatial database using  
215 ArcMap 10.6.1 [108]. We split the contour line to denote *Nereocystis* presence/absence  
216 alongshore, with a minimum mapping length of 3 m for single bulbs (Fig 2). Features were  
217 generally one or more orders of magnitude larger than the minimum mapping unit in all datasets  
218 except the 2017 synoptic snapshot (S1 Text, S1 Fig). Because many sources constituted general  
219 depictions of *Nereocystis* presence, rather than maps, we subsequently further generalized the  
220 linear data by summarizing presence/absence over 1-km segments of shoreline. We  
221 systematically divided the isobath into 1-km segments, defining 459 segments along the 452 km  
222 study area. Of these, 14 segments (3%) deviated from the 1 km length by more than 15%.

223 Twelve segments measured less than 1 km, all occurred along shorelines and islands where the  
224 isobath was not an integer multiple of 1 km. Two offshore shoals exceeded 1 km (1.2 and 1.3  
225 km, respectively). For data sources with approximate locations, such as phycological surveys or  
226 navigation descriptions from the Coast Pilot, we assigned presence/absence to 1-km segments.

227

228 **Fig 2. Examples of data sources and compilation methods, showing the -6.1 m (MLLW) isobath**  
229 **contour line overlaid on georeferenced data sources.** All maps depict the southern tip of Squaxin  
230 Island (sector #1 in Fig 7), scale varies slightly to capture entire area classified with *Nereocystis* for each  
231 data source. The isobath (red or blue line) was split into 1 km sections, black circles indicate boundaries.  
232 Line colors indicate whether *Nereocystis* was classified as present (red) or absent (blue) in each 1-km  
233 segment. The nested black line notes the linear extent of *Nereocystis* delineated in the individual data  
234 source. Data sources (see Table 1): (A) topographic sheet #1672 (1878), wavy lines symbolized kelp. (B)  
235 kelp harvest map (1911), a polygon symbolized kelp. (C) hydrographic sheet #6198 (1936), wavy lines  
236 symbolized kelp. (D) Washington Department of Fisheries field notes (1978), kelp polygon drawn on a  
237 chart. (E) The Washington ShoreZone Inventory (1999), floating kelp was noted as patchy or continuous  
238 within geomorphologically defined units along the high tide line (black line) with triangles denoting unit  
239 ends, purple hatches identify the unit with patchy kelp. (F) DNR habitat map (2017), the perimeter of the  
240 floating kelp bed was delineated from kayak at low tide (green polygon) at sites of concern and  
241 alongshore extent at other sites.

242

243 We evaluated the two alternative approaches (linear extent vs 1-km segments) for mapped  
244 data sources, the results were similar (S1 Text, S2 Fig). We concluded that the 1-km segment  
245 scale was superior because it generalized the highly variable levels of resolution among surveys,

246 and it also allowed for inclusion of data sources that were not precisely located. The limitation of  
247 1 km shoreline segment approach was that it could not detect subtle changes in distribution, such  
248 as changes in the extent of *Nereocystis* within a segment. However, because differences among  
249 survey methodologies generally precluded identification of subtle changes, the benefit of  
250 including more data sets outweighed the cost of decreased precision and allowed more temporal  
251 variability across the domain to be evaluated.

252 We recorded 3,232 instances of *Nereocystis* presence/absence between 1873 and 2018 at  
253 1-km segments. At segments where *Nereocystis* occurred at least once, the number of  
254 presence/absence observations per segment over the entire time period ranged from 6 to 14, with  
255 a median of 8. Fewer data sources existed in the heads of embayments where *Nereocystis* never  
256 occurred, leading to a slightly lower study area-wide median of seven observations per segment.

257 We used a series of metrics to assess spatiotemporal patterns in *Nereocystis* distribution.  
258 First, we selected six synoptic datasets, separated by 19 to 44 years, that each comprehensively  
259 assessed the study area over a limited time period (Table 1). For simplicity, we refer to each  
260 synoptic snapshot with a single year from the mid-point of the surveys. The six synoptic  
261 snapshots employed the majority of the presence/absence observations (2,239 of 3,232  
262 observations, or 69%). The earliest synoptic snapshot was completed in the 1870s, which  
263 constitutes a baseline of conditions early in the history of European settlement in the Puget  
264 Sound region. We assessed changes in kelp distribution throughout SPS from this baseline to  
265 recent conditions by comparing the number of 1-km segments with *Nereocystis* present and  
266 proportion of segments per sub-basin with *Nereocystis* present in the 1870s and 2017. These two  
267 surveys were relatively detailed and based on extensive field surveys (Table 1).

268

269 **Table 1. Synoptic *Nereocystis* surveys completed in South Puget Sound.**

| Survey Years | Purpose    | Reference Year | Data Source Description                                                                                                                                                                                                                                                                                                                                                                                                                                                                                                                                                  | Scale             |
|--------------|------------|----------------|--------------------------------------------------------------------------------------------------------------------------------------------------------------------------------------------------------------------------------------------------------------------------------------------------------------------------------------------------------------------------------------------------------------------------------------------------------------------------------------------------------------------------------------------------------------------------|-------------------|
| 1873-1879    | navigation | 1876           | Topographic sheets nos. 1327a, 1327b, 1671, 1672, 1674 1528 [59, 60, 62-65]. Surveyed in the field on plane tables [109]. Geo-referenced maps[110] were aggregated into a synoptic snapshot. (Fig 2A)                                                                                                                                                                                                                                                                                                                                                                    | 1:10,000          |
| 1911-1912    | harvest    | 1911           | Kelp harvest surveys were completed throughout Puget Sound as part of the west coast-wide Fertilizer Investigations [69]. Beds delineated on final maps were wider than actual bed width denoted on preparatory maps. (Fig 2B)                                                                                                                                                                                                                                                                                                                                           | 1:100,000         |
| 1935-1936    | navigation | 1935           | Hydrographic surveys nos. 5931, 6102, 6103, 6104, 6105, 6106, 6107, 6108, 6197, 6198, 6199, 6202, 6203, 6204, 6205 [71-85]. The source data for navigation charts, included field surveys of soundings and aids to navigation. Multiple maps were aggregated into a synoptic snapshot. (Fig 2C)                                                                                                                                                                                                                                                                          | 1:10,000-1:20,000 |
| 1978         | habitat    | 1978           | Washington Department of Wildlife field survey maps[92], annotated in pencil on a paper hydrographic chart, source for the Coastal Zone Atlas[111]. (Fig 2D)                                                                                                                                                                                                                                                                                                                                                                                                             | 1:100,000         |
| 1997 - 1999  | habitat    | 1998           | WA State ShoreZone Inventory, based on low tide helicopter-based videography [30, 51]. Classified <i>Nereocystis</i> alongshore presence as patchy (<50%) or continuous (>50%) within geomorphically-defined linear shoreline units (Fig 2E)                                                                                                                                                                                                                                                                                                                             | 1:24,000          |
| 2017         | habitat    | 2017           | GPS-based small boat survey that noted presence of <i>Nereocystis</i> as a line feature along the -6.1 m bathymetry line and as a polygon feature for beds of concern [103]. Single bulbs or aggregations were mapped with a minimum linear width of 3 m. A 10 m threshold between alongshore plants was applied to classify gaps as 'absent'. The 2017 survey was likely to detect more <i>Nereocystis</i> than other surveys due to the small minimum mapping unit, the low threshold for <i>Nereocystis</i> presence (one bulb), and extensive field effort. (Fig 2F) | 1:12,000          |

270

271 While the synoptic snapshots allowed for comparison of distinct time points, they  
 272 excluded 31% of the segment-scale observations, including highly detailed phycological studies  
 273 and dive surveys. We employed the entire pool of observations to further explore patterns in the  
 274 most recent *Nereocystis* occurrence per segment and overall persistence. We defined persistence  
 275 as the proportion of all data sources at each 1-km segment that noted *Nereocystis* presence.

276 Because the data showed a shift from presence to absence at many segments after the 1978  
277 synoptic survey, we calculated persistence before and after 1980.

278 To compare patterns of kelp abundance and distribution over time within sub-areas, we  
279 divided the SPS basin into 3 sub-basins (Fig 1). The sub-basins partitioned the area along a  
280 gradual seasonal gradient in water temperature and nutrient concentrations [44, 112].

281 We summarized patterns in presence/absence from all surveys by lumping segments  
282 where *Nereocystis* ever occurred into contiguous sectors less than 10 km in length. Sector  
283 boundaries considered geomorphological features, such as headlands, and oceanographic  
284 features, such as fetch and aspect. We defined 30 sectors, a tractable number of locally  
285 recognized geographic landmarks for local management and research. Because initial analyses  
286 showed strong declines in *Nereocystis* in many sectors, we summarized presence to be the  
287 occurrence of any *Nereocystis* within each sector.

## 288 **Water temperature, salinity and nutrient concentration data**

289 We explored the relation of surface water temperature, salinity and nutrient concentrations  
290 to observed kelp distribution by characterizing long-term conditions from mid-channel water  
291 quality monitoring stations and recent conditions from nearshore stations.

### 292 **Long term, mid-channel conditions**

293 We described long term water properties with publicly available data from four mid-  
294 channel water quality stations, sampled monthly by the Washington State Department of  
295 Ecology [113]. We restricted our analysis to the top five meters of the water column  
296 characterized in continuous vertical profiles measured with a conductivity, temperature and

297 depth (CTD). We summed nitrate, nitrite and ammonium concentrations to represent dissolved  
298 inorganic nitrogen (DIN) at the two shallowest reported depths for nutrients (0 m and 10 m).  
299 Monthly values for each parameter at each depth for all available years were reduced to a  
300 representative annual pattern using locally estimated scatterplot smoothing (LOESS). More than  
301 two decades of monthly data exist at three of the stations, DNA001 (1989-2016), NSQ002  
302 (1996-2016) and GOR001 (1996-2016). At NRR001, data is limited to three years (1989-1991).

### 303 **Recent nearshore conditions**

304 We characterized recent nearshore water column properties along an axis from the  
305 entrance to SPS at Tacoma Narrows to the most distal documented kelp forests using data  
306 collected at seven nearshore sites monthly from September 2017 to August 2018. This axis  
307 encompasses a known environmental gradient [113], and sites were placed near historical and  
308 recent *Nereocystis* beds (Fig 3). All sites were surveyed on the same day, within two hours of  
309 solar noon, during low tide and low current periods. A sampling station was established in the  
310 center of each site along the -6.1 m (MLLW) bathymetric contour. A weighted *SonTek*  
311 *Castaway*®-CTD measured temperature and salinity. We calculated mean salinity and  
312 temperature for the top 5 m of the water column. From March to September 2018, field-filtered  
313 water samples were also collected to measure DIN concentrations at four sites as time permitted  
314 (Squaxin Island, Devil's Head, Day Island, Salmon Beach). From May to September, samples  
315 were taken from each site at 0.25 m and 4 m depths in order to assess possible surface water  
316 stratification during late-spring and summer. In March and April, only 1 sample was collected at  
317 4 m depth. An acid washed 60 mL syringe with an attached 0.45 µm cellulose acetate filter was  
318 filled with water directly from a Van Dorn sampler. A small amount of water was filtered  
319 through the syringe to rinse the syringe and syringe filter before rinsing an acid washed 60 mL

320 high density polyethylene bottle with filtrate. The bottle was then filled with filtrate before being  
321 placed immediately in a cooler on ice and transported to the Evergreen State College laboratory  
322 where they were frozen (-10° C) for later transport to the University of Washington's Marine  
323 Chemistry Lab for total dissolved nutrient analysis using spectrophotometric methods.

324

325 **Fig 3. Monthly water characteristics at mid-channel long-term monitoring stations (left) and**  
326 **nearshore stations (right).** (A, B) mean water temperature to 5 m depth. (C, D) mean salinity to 5 m  
327 depth. (E) DIN concentration at mid-channel stations at depths of 0 m (solid line) and 10 m (dashed line).  
328 (F) DIN concentration at nearshore stations at depths of 0.25 m (point) and 4 m (triangle), with data  
329 slightly offset horizontally for visibility. Site locations for (G) mid-channel stations and (H) nearshore  
330 stations. Mid-channel long-term monitoring station data (left) represent a cubic spline curve fit to mean  
331 values from more than 2 decades of sampling for all stations except NRR001 (3 years). Nearshore stations  
332 (right) were sampled monthly at -6.1 m (MLLW) between September 2017 and August 2018.

333

## 334 **Wave and current exposure characterization**

335 We used modelled current velocity and wave heights to explore the relationship between  
336 these physical factors and spatiotemporal patterns in *Nereocystis*. We limited these comparisons  
337 to segments where *Nereocystis* was observed at least once (n=120).

338 We characterized current speed using modelled surface water velocity data from a Salish  
339 Sea circulation model [43, 114, 115]. We used data from the surface layer, which represents the  
340 top 3% of the water column, from model year 2014. We calculated the annual average of the  
341 maximum daily flow velocity (m/s) based on the flow velocities in the x and y directions at each



342 model node. We then summarized velocity with a single value for each 1 km shoreline segment  
343 by selecting the value from the closest model grid point. Median distance between model node  
344 points and the corresponding shoreline segment was 91 m.

345 We characterized wave energy using average annual maximum wave height data  
346 developed by the Washington Coastal Resilience Project using the numerical wave model  
347 SWAN (Simulating WAVes Near Shore) [116]. The model generated a hindcast of hourly wave  
348 conditions across the Salish Sea over a 60-year period between 1950 and 2010. Modeled values  
349 were sampled along the -10 m (NAVD88) bathymetric isobath for SPS and quantified the  
350 average annual maximum wave height over the 60-year hindcast. The hindcast utilized the 12-  
351 km Weather Research and Forecasting historic reanalysis of the Pacific Northwest [117, 118]  
352 which was found to represent the spatial patterns of extreme wind events well, but bias wind  
353 speeds slightly lower (~1 m/sec) than observed winds over water. Because of this slight bias and  
354 because significant wave heights characterize the upper 33% of the wave-height distribution, the  
355 wave heights reported here are likely underestimates. We summarized the wave data every 1-km  
356 alongshore by selecting the wave model grid point closest to each 1-km segment. Median  
357 distance between the model point data and the corresponding shoreline segment was 3.4 m.

## 358 **Statistical analyses**

359 All data analyses were performed in ArcGIS version 10.6.1 [108] and R 3.6.0 [119]. Data  
360 analysis of kelp extent focused on describing spatial and temporal patterns over time because  
361 methods varied widely among data sources and replicate samples did not exist.

362 We tested if temperature was different among sites during summer (June to September) or  
363 winter (November to February) using two mixed effects models (one for each season) with a

364 random factor of month (temperature ~ site, random = 1|month), with the R packages  
365 “nlme”[120] and “emmeans” [120]. We tested if residuals were normally distributed using  
366 qqplots and Shapiro-Wilk tests and visually assessed model output for patterns in normalized  
367 residuals.

368 We tested for differences among sub-basins in current speed and wave height at sites  
369 where *Nereocystis* was observed at least once using Welch’s ANOVA to accommodate unequal  
370 variance and unequal sample sizes, with the R package “userfriendlyscience” [121]. The wave  
371 data were normally distributed, and the current data were log transformed to achieve a normal  
372 distribution.

373

## 374 **Results**

### 375 ***Nereocystis* extent declined and spatial distribution shifted**

376 Based on all available data sources, *Nereocystis* occurred at least once along 26% of the  
377 SPS shoreline (120 of 452 1 km shoreline segments) between 1873 and 2018. *Nereocystis* never  
378 occurred in the extreme reaches of any inlets (Fig 1). When aggregated, the six synoptic  
379 snapshots recorded a similar total *Nereocystis* extent over the entire time period as the complete  
380 collection of data sources (115 segments and 120 segments, respectively). The extent of  
381 *Nereocystis* classified in synoptic snapshots fell into two distinct groups (Fig 4): more than 60  
382 segments were identified with *Nereocystis* in 1876, 1935 and 1978 (65, 68, and 65 segments,  
383 respectively). In contrast, *Nereocystis* occurred in one-third as many segments in 1911, 1998,  
384 and 2017 (16, 26, and 25 segments, respectively). Differences among datasets in total extent  
385 likely reflect both changes in kelp distribution and methodological differences among surveys.

386 The 1911 estimate was the lowest, and it starkly contrasts the high estimates before (1876) and  
387 after (1935). The 1911 estimate could have marked a minimum in *Nereocystis* extent, however it  
388 is also likely that the project objective to identify beds with harvest potential for fertilizer  
389 resources led to identification of a limited number of large, accessible beds rather than an  
390 exhaustive survey (Table 1, S1 Text, S1 Fig, Results section). The most recent estimates from  
391 1998 and 2017 suggest that *Nereocystis* extent was dramatically restricted in recent years to one-  
392 third of the extent in 1876, 1935 and 1978.

393

394 **Fig 4. Number of 1-km segments with *Nereocystis* present between 1876 and 2017, based on six**  
395 **comprehensive snapshot surveys, summarized over three sub-basins.** Recent estimates (1998 and  
396 2017) are dramatically reduced relative to estimates in 1876, 1935 and 1978. The 1911 estimate could  
397 represent a low point in kelp extent, but likely reflects methodological differences in survey methods  
398 (harvest study).

399

400 The six synoptic snapshots showed a marked shift in the spatial distribution of kelp forests  
401 among sub-basins over time (Fig 4). The Central sub-basin had the most shoreline with  
402 *Nereocystis* in 1876, 1935, and 1978 (74%, 63% and 48%, respectively) and a third of the total in  
403 1911 (38%). In contrast, the Central basin only contained a tenth of the total extent in the two  
404 most recent surveys (12% in 1998 and 8% in 2017). The West sub-basin generally contained a  
405 smaller proportion of the total shoreline with *Nereocystis* than the Central sub-basin, 8-19% over  
406 the entire time period. Proportional decreases in Central and West corresponded to increases in  
407 the East, where the proportion increased from 8-44% during the earliest four surveys to 77-84%  
408 in the two most recent surveys.

409           The 1876 synoptic survey constitutes the oldest known comprehensive temporal baseline,  
410 surveyed early in the history of European settlement in the region and SPS. When compared to  
411 the most recent synoptic survey in 2017, *Nereocystis* extent decreased by 62% throughout the  
412 SPS study area, from 65 to 25 1-km segments. The most extreme losses occurred in the Central  
413 sub-basin, where kelp decreased by 96%, followed by the West sub-basin, where *Nereocystis*  
414 decreased by 83%. In the Central sub-basin in 2017, *Nereocystis* occurred in only two isolated  
415 segments, while in the West sub-basin *Nereocystis* was confined to a single bed that spanned two  
416 contiguous segments. In contrast, the linear extent in East sub-basin more than tripled to 21  
417 segments.

418

### 419 **Most recent occurrence of *Nereocystis* and persistence over time**

420           Analysis of all data sources provided similar results as the synoptic snapshot surveys, and  
421 greater detail on patterns of persistence at segments and the timing of the most recent occurrence  
422 of *Nereocystis*. The East sub-basin contained the greatest proportion of recent occurrences;  
423 *Nereocystis* occurred at 72% of the segments since 2000 and at all segments since 1960 (Fig 1  
424 and Fig 5). In contrast, in the Central and West sub-basins, at the majority of segments the most  
425 recent *Nereocystis* occurrence was prior to 1980 (89% and 63%, respectively).

426

427 **Figure 5. Year of most recent *Nereocystis* occurrence within each sub-basin.** Bar plots show the  
428 proportion of segments within each sub-basin. Years were binned into 20 year increments, with two  
429 bins excluded due to lack of data. All 1-km segments where *Nereocystis* occurred at least once  
430 during the entire study period were included (n=120).

431

432 Persistence, measured as the proportion of data sources that noted *Nereocystis* presence  
433 within each 1-km segment, ranged from 0.1 to 1, with a median of 0.3. There was a marked  
434 difference among sub-basins in *Nereocystis* persistence before and after 1980 (Fig 6). Before  
435 1980, persistence was similar in West and Central (median values of 0.27 and 0.22,  
436 respectively), and slightly higher in East with a median of 0.55. After 1980, median persistence  
437 dropped to 0 in the West (13 of 16 segments decreased) and 0 in the Central sub-basins (73 of 74  
438 segments decreased) and remained stable in the East sub-basin (median value of 0.60, 9 of 28  
439 segments decreased). After 1980, most segments with high persistence were restricted to the East  
440 sub-basin (Fig 7). In the Central sub-basin, two spatially isolated beds remained, along with beds  
441 along the approach to the Tacoma Narrows (Fig. 7). In the West sub-basin, the bed located off  
442 the southern tip of Squaxin Island remained highly persistent throughout both time periods  
443 (sector #1 in Fig 7).

444

445 **Figure 6. Distribution of *Nereocystis* persistence at 1-km segments (A) before 1980 and (B) after**  
446 **1980.** Persistence was calculated as the proportion of all observations in each segment with *Nereocystis*  
447 present within each time period. All 1-km segments where *Nereocystis* occurred at least once in either  
448 time period were included (n=120).

449

450 **Figure 7. Persistence of *Nereocystis* at segments and sectors (groups of segments).** Maps show  
451 persistence at segments (A) before 1980 and (B) after 1980. Persistence was calculated as the proportion  
452 of all observations with *Nereocystis* present within each time period. Segments where *Nereocystis* never  
453 occurred are not shown). The maps also show groups of adjacent segments aggregated into shoreline

454 sectors (<10 km in length), with numeric identifiers for each sector and black tick marks delineating  
455 boundaries. (C) identifies all sectors by geographic name and number and summarizes all observations as  
456 presence/absence for each sector by survey year. Color denotes presence (red) or absence (grey). Shapes  
457 represent dataset type ('x' for navigation chart, triangle for kelp/habitat survey, inverted triangle for  
458 phycological survey, + for fish survey).

459

460 Generally, sectors in the West and Central sub-basins most often exhibited a pattern of  
461 presence in early years and absence in recent decades, with a common transition following the  
462 1978 synoptic survey (Fig 7C). One widespread exception to this temporal pattern occurred in  
463 1911, when little *Nereocystis* was recorded overall. This exception could be an artifact of project  
464 intent to identify economically viable beds for harvest (Table 1), or it could reflect response to  
465 intensive logging along the shoreline during early settlement or it could reflect a natural  
466 minimum in *Nereocystis* distribution.

467 Detailed site-scale studies confirmed the presence of *Nereocystis* at many segments prior  
468 to the shift observed in large area mapping projects around 1978. Phillips [88] documented a  
469 fringing *Nereocystis* bed during a dive survey in 1962 at Dickenson Point (sector #3 in Fig 7)  
470 [88]. One of the authors (Mumford) remembers *Nereocystis* beds at Dickenson Point and nearby  
471 Itsami Ledge (sectors #3 and #4 in Fig 7) in the 1970s, with the last occurrence of scattered  
472 plants at both sectors in the early 1980s. Hodgson and Waaland [91] recorded *Nereocystis* in a  
473 multi-year phycological study in 1971 and 1972 at Hale Pass SW (sector #17 in Fig 7). In the  
474 Tacoma Narrows where *Nereocystis* has been noted to be present in recent years, Maxell and  
475 Miller [32] confirmed presence in 1993 and 1994 in a dive-based phycological study (sector #28  
476 in Fig 7). More recently, a second distinct shift occurred in 2017 and 2018 [103], when

477 *Nereocystis* disappeared from Brisco Pt, Devil's Head and Fox Island SW (sectors #2, #7 and  
478 #19, respectively). These recent losses further restrict the recent distribution of *Nereocystis* in  
479 SPS (Fig 8). None of the beds that disappeared have returned. While *Nereocystis* beds persist at  
480 Squaxin Island and Fox Island SE (sector #1 and #25, respectively), intensive monitoring  
481 documented declines in bed area between 2013 and 2018 [103].

482

483 **Figure 8. Most recent estimate of *Nereocystis* distribution in SPS.** The -6.1 m bathymetric contour line  
484 denotes all 1-km segments where *Nereocystis* was observed to be present between 1873 and 2018. Pink  
485 denotes segments where *Nereocystis* was present during most recent observation (2017 or 2018) while  
486 blue denotes segments where *Nereocystis* was present in the past and absent in the most recent  
487 observation.

488

## 489 **Sea surface temperature and nutrient data show strong gradient**

490 Water temperature, salinity and nutrient concentration data displayed strong seasonal and  
491 spatial patterns that were similar at the long-term mid-channel stations and the nearshore stations  
492 sampled in 2017-2018 (Fig 3). For the winter nearshore temperature data, the likelihood ratio test  
493 indicated that including site did not improve the final mixed effects model ( $L = 4.7$ ,  $df = 1$ ,  $p =$   
494  $0.034$ ), indicating that average winter water temperature did not differ among sites. In contrast,  
495 nearshore summer water temperatures varied markedly among sites ( $L = 52.52$ ,  $df = 1$ ,  $p <$   
496  $0.001$ ). Post-hoc tests confirmed that the magnitude of differences in summer temperature  
497 increased with geographic distance between sites. Minimum annual temperatures ( $8^{\circ}\text{C}$ ) occurred  
498 during February/March, with less than  $1^{\circ}\text{C}$  difference among all stations. From March to

499 October, the warmest water consistently occurred in the West sub-basin at adjacent locations in  
500 Dana Passage (DNA001 mid-channel station) and Squaxin Island (nearshore station), with  
501 slightly higher measurements at nearshore stations. The highest overall water temperature  
502 recorded at a nearshore station occurred at Squaxin Island in July 2018 (16.2 °C). The coolest  
503 spring-fall temperatures consistently occurred in the East sub-basin at adjacent locations in the  
504 Tacoma Narrows (NRR001 mid-channel station) and Salmon Beach (nearshore station). At  
505 Salmon Beach, nearshore temperature peaked at 13.9 °C in August 2018. Central sub-basin water  
506 temperatures fell midway between the extremes measured at Tacoma Narrows and Dana Passage  
507 at all of the mid-channel and nearshore stations, with a consistent gradient of values increasing  
508 with distance from the Tacoma Narrows. The water column at all nearshore stations was well  
509 mixed even in July during peak annual temperatures, with less than 0.5 °C range per cast  
510 between the surface and 5 m depth (S3 Fig).

511 Salinity ranged from 28 – 30 PSU (long-term curve-fit) at mid-channel stations, with  
512 similar values and annual patterns at nearshore stations. Salinity was higher in the summer and  
513 late fall, a common pattern in the region associated with annual rainfall and freshwater input  
514 cycles. Extreme salinity values occurred at the geographic extremes of Tacoma Narrows and  
515 Dana Passage. Nearshore salinity ranged from 27.1 PSU in February at Squaxin Island to 30.3  
516 PSU at Salmon Beach in November.

517 DIN concentrations at mid-channel stations were high in the winter months at all stations;  
518 generally, 25 µM and greater at depths of 0 m and 10 m (Fig 3). Values diverged throughout the  
519 spring, with pronounced differences among sites from May to October. Concentrations were  
520 slightly higher at depth. A strong spatial gradient emerged, with decreasing concentrations into  
521 SPS and the most extreme drawdown of nutrients at Dana Passage, where the long-term mean



522 fell below 10  $\mu\text{M}$  at both 0 m and 10 m depth from June to September. Nearshore DIN  
523 concentrations showed a similar pattern for all months with data. Nearshore concentrations were  
524 indistinguishable at stations sampled during March 2018, ranging from 26 - 26  $\mu\text{M}$  at 4 m depth.  
525 Concentrations at Squaxin dropped every successive month until August, reaching the lowest  
526 concentration measured at any site in August 2018 (0.4  $\mu\text{M}$  at 0.25 m depth). In contrast,  
527 nearshore DIN concentrations at the other stations never dropped below 10  $\mu\text{M}$ .

528

### 529 **Recent *Nereocystis* observations predominated in high current areas**

530 Average maximum daily current velocities ranged from 0.14 to 2.59 m/s (median 0.52  
531 m/s) at segments where *Nereocystis* was observed at least once during the entire study time  
532 period (Fig 9). Current velocities differed among sub-basins (Welchs ANOVA test:  $F(2, 116) =$   
533  $61.85, p < 0.001$ ). The East sub-basin experienced significantly larger current velocities than the  
534 West and Central sub-basins (Games Howell post hoc test,  $p < 0.001$ ), where median velocity  
535 (1.63 m/s) was approximately 4 times larger than in the West (0.42 m/s) and Central (0.48 m/s)  
536 sub-basins. Comparison of historical *Nereocystis* observations with current velocity data showed  
537 all of the segments where *Nereocystis* has not been observed since 1980 or earlier experienced  
538 current velocities of 1 m/s or less. After 2000, the majority of segments with *Nereocystis* were  
539 restricted to shorelines with mean maximum daily currents above 1 m/s, which were  
540 predominantly located in the East sub-basin. However, notable exceptions exist to this pattern;  
541 the remaining segments with *Nereocystis* in West and Central sub-basins range in current  
542 velocity from 0.31-0.82 m/s.

543

544 **Figure 9. Current and wave exposure at 1-km segments with *Nereocystis*.** The annual mean of  
545 maximum daily current speed (y-axis) is derived from a 2014 model run of the Salish Sea Model [110,  
546 111]. Values represent the average maximum daily current velocities in the upper 3% of the water column  
547 at the nearest model node. Average annual maximum wave height along 1 km shoreline sections was  
548 estimated with model data from 1950 to 2010 developed by the Washington Coastal Resilience Project  
549 [112]. Segments are coded by sub-basin and the most recent year that *Nereocystis* was observed.

550

551 Average annual maximum wave height ranged from 0.28 m to 0.99 m (median 0.62 m) at  
552 segments where kelp was observed at least once during the entire study time period throughout  
553 SPS. Wave height did not differ among sub-basins (Welchs ANOVA test:  $F(2, 116) = 0.7, p$   
554  $=0.50$ ) but displayed high spatial variability dependent on shoreline orientation. Locations facing  
555 South/North recorded higher annual maximum wave heights, indicative of the dominant wind  
556 directions in Puget Sound. Median values within the sub-basins ranged from 0.58 – 0.70 m. No  
557 patterns were evident over time in the range of wave heights at segments where *Nereocystis* was  
558 observed (Figure 9).

559

## 560 **Discussion**

### 561 **Baseline shows major *Nereocystis* losses and shift in distribution**

562 This study established a historic baseline for *Nereocystis* distribution in SPS during the  
563 1870s, early in the period of European settlement in the region. We described major losses from  
564 that baseline in both extent and distribution over 145 years. The most extreme decreases  
565 occurred in the Central and West sub-basins; the most recent dataset identified only one isolated

566 location with *Nereocystis* remaining in each of these sub-basins. In contrast, the East sub-basin  
567 appeared stable or increasing. Many of the observed losses in the West and Central sub-basins  
568 have persisted for four decades or longer, which demonstrates they are not associated with inter-  
569 annual variation.

570       The observed trend of *Nereocystis* decrease in SPS over 145 years contrasts sharply with  
571 findings along the Strait of Juan de Fuca, at the entrance to the Salish Sea. There, kelp forest area  
572 generally remained stable over the last century, except along the eastern boundary—the area  
573 farthest from oceanic influence and closest to anthropogenic development [5]. This contrasting  
574 pattern of adjacent sub-regions experiencing loss and stability has occurred in other locations  
575 globally [13, 18, 22, 40].

576

## 577 **Conditions associated with observed patterns in *Nereocystis***

578       While data on long-term trends in temperature and nutrient concentrations were not  
579 available, data from recent decades characterized general conditions. Elevated temperatures and  
580 low nutrient concentrations occurred in tandem in SPS, a pattern seen in upwelling systems  
581 along the exposed coast and in other areas within the Salish Sea [14, 122-126]. In SPS, summer  
582 temperatures were considerably higher and nutrient concentrations were considerably lower  
583 compared to the exposed coast and Strait of Juan de Fuca where upwelling and ocean mixing  
584 drive water column properties [127]. Many studies have shown that kelp is sensitive to high  
585 temperatures and low nitrogen. An 18-year study concluded that temperature increases from a  
586 thermal outfall were associated with the virtual disappearance of *Nereocystis* [128]. In British  
587 Columbia, elevated temperatures have been associated with lower abundance of *Nereocystis*

588 [105] and other kelp species [40]. In SPS, *Nereocystis* appeared stable in the East sub-basin,  
589 where temperature did not exceed 14.0 °C, a threshold used in southern California for  
590 compromised kelp performance [129]. In contrast, summer temperatures at nearshore stations in  
591 the West and Central sub-basins consistently exceeded this threshold, and additional sampling  
592 within the Squaxin Island kelp forest documented even higher temperatures than at the nearshore  
593 stations, ranging from 17 °C to 20 °C [103]. These temperature maxima approached or exceeded  
594 thresholds for decreased resilience of sporophytes and increased zoospore mortality [36, 130,  
595 131].

596 Nitrogen requirements for *Nereocystis* are not defined, yet data suggest that low summer  
597 concentrations in recent decades may be impacting *Nereocystis* performance in portions of SPS.  
598 The authors observed that the *Nereocystis* blades at Squaxin Island were thin, relatively short and  
599 shredded. In field studies, concentrations of 10 µM were associated with thicker blade tissues  
600 and a lower rate of blade erosion in *Macrocystis* sporophytes [132]. Laboratory studies showed  
601 increased performance in microscopic stages of *Nereocystis* associated with DIN increases from  
602 1 to 15 µM [36]. Nitrogen requirements may be greater during periods of rapid growth or  
603 elevated temperatures [133]. In Puget Sound, anthropogenic inputs are a major local source of  
604 DIN [134]. However, worldwide research predicts that elevated anthropogenic nutrient loads  
605 damage kelp performance by stimulating growth of phytoplankton [43] and nuisance algae, and  
606 introducing particulates and other pollutants and contaminants [20, 135]. While long-term trends  
607 are not well understood, anthropogenic DIN inputs in Puget Sound have altered dissolved  
608 oxygen levels and algal biomass [43], and the nutrient balance appears to have shifted in recent  
609 decades with potential impacts to species composition and material cycling [136, 137].

610 Notable exceptions exist to the general pattern of *Nereocystis* losses in sub-basins with  
611 higher temperatures and lower nutrients. The innermost bed at Squaxin Island remained highly  
612 persistent despite the poorest measured environmental conditions. This exception demonstrates  
613 that *Nereocystis* can persist in elevated temperature and low nutrient conditions. The authors  
614 believe that the long fetch from prevailing, year-round southern winds and extensive appropriate  
615 shallow subtidal habitat contribute to *Nereocystis* persistence. However, even there, more  
616 intensive studies found that total bed area and maximum depth decreased between 2013 and  
617 2018 [103]. Another important exception to the general pattern was the widespread *Nereocystis*  
618 loss in the Central sub-basin, where temperature and nutrient concentrations were intermediate.  
619 These exceptions demonstrate that additional factors outside the scope of this study contributed  
620 to trajectories of kelp persistence or loss.

621 Many studies have demonstrated that hydrodynamic exposure to waves and currents  
622 influences kelp dynamics directly and indirectly. Along exposed coastlines, physical disturbance  
623 through extreme wave events can drive kelp mortality [15]. In areas of low water motion, the  
624 boundary layer can limit the capacity of kelp to acquire nutrients and eliminate waste products  
625 [7, 138]. In relatively sheltered environments in other regions, wave exposure metrics were  
626 positively correlated with greater kelp performance and negatively correlated with elevated  
627 temperature [40]. SPS has a relatively protected wave environment, with short-period waves (<5  
628 sec) that have significantly less energy than long-period ocean swell in other habitats where  
629 *Nereocystis* occurs. In SPS, current velocity is the primary source of daily water turbulence, and  
630 strong tidal currents lead to lower temperatures and higher nitrogen levels through mixing,  
631 especially at the Tacoma Narrows [49]. These factors could explain the observed pattern of  
632 *Nereocystis* losses in low current areas versus persistence in recent years in intermediate and

633 high current areas. Areas of intense mixing may constitute kelp refugia from physical stressors,  
634 and low current areas may exacerbate the negative effects of stressors.

635         Currents can also mediate biotic stressors. In the San Juan Archipelago in northern Puget  
636 Sound, mesograzers, especially the small snail *Lacuna vincta*, play an important role in mortality  
637 to *Nereocystis* in hydrodynamically quiescent habitats; periods of weak currents allow grazers to  
638 crawl up and structurally damage stipes, making them vulnerable to shear under strong,  
639 infrequent tidally driven drag force [34]. While *Lacuna* snails were not commonly observed in  
640 SPS in 2017 and 2018, kelp crabs (*Pugettia producta*) were abundant on the blades, bulbs and  
641 stipes in the *Nereocystis* forests that were not subjected to regular, intense currents. Kelp crabs  
642 preferentially consume fresh *Nereocystis* in Puget Sound, and laboratory and field experiments  
643 suggest that they may play an important role in mediating the growth and survival of *Nereocystis*  
644 in the Salish Sea [139, 140]. Sea urchins can control kelp populations, especially in the absence  
645 of predators, however sea urchins were observed to be absent or rare in SPS.

646         Many other factors that are known to drive kelp abundance, and are outside the scope of  
647 this study, likely also played a role in the observed changes in *Nereocystis* distribution. Human  
648 activities—especially logging and coastal development—have increased sediment [141-144],  
649 nutrient[135] and pollutant loads to coastal ecosystems [134]. These factors are associated with  
650 the global ‘flattening of kelp forests’, through altering competitive interactions with turf algae  
651 [20]. In SPS, widespread deforestation began in the mid-1850s, and likely profoundly increased  
652 sedimentation. Changes to nearshore biotic interactions, often through fishing/harvest, can alter  
653 controls on grazer populations by decreasing predation [6, 17, 18]. In SPS, rockfish [145] and  
654 other groundfish [146], salmonids [147] and forage fish [148] populations have been  
655 dramatically reduced relative to historical levels. These species occupy middle to high trophic

656 positions, directly and indirectly influencing populations of kelp grazers [18, 149]. Alterations to  
657 disturbance regimes following changes in trophic dynamics can also facilitate competition  
658 between *Nereocystis* and other macroalgal species. In the absence of disturbance, perennial algae  
659 can exclude annual kelp species such as *Nereocystis* [17]. The invasive perennial alga *Sargassum*  
660 *muticum*, which was observed at many historical and current *Nereocystis* sites in SPS, can  
661 competitively exclude native kelp through shading [25]. Compounding the effects of these  
662 diverse stressors, sporophyte mortality may impact basin wide bed connectivity because most  
663 spores settle within a few meters of the parent sporophyte [150].

664         While the historical data in this study lacked sufficient temporal resolution for comparison  
665 to climate indices, two notable climate events corresponded to observed *Nereocystis* declines.  
666 The large decline following the 1978 survey coincided with a shift from a cold to a warm regime  
667 defined in Pacific Decadal Oscillation (PDO) data [151]. The decline between 2013 and 2018  
668 coincided with a period of warm sea surface temperature in the northeast Pacific known as ‘the  
669 Blob’ [152]. Marine heatwaves doubled globally between 1982 and 2016 and are projected to  
670 become more frequent and extreme [153].

671

## 672 **Conclusion**

673         This study identified substantial losses of *Nereocystis*, an important biogenic habitat, in  
674 SPS over 145 years. It also related several physical factors that are commonly associated with  
675 kelp performance to the temporal variability in *Nereocystis* extent. Given the importance of  
676 biogenic habitats to ecosystem structure, the findings underscore a need to investigate the  
677 potential causes of change, possible management responses, and linkages to other species.

678

## 679 **Acknowledgments**

680 This work was funded by the Washington State Department of Natural Resources, Washington  
681 Coastal Resilience Project, and U.S. Geological Survey Coastal Habitats in Puget Sound Project.  
682 We thank many scientists who contributed to field work and data synthesis, including Jeff  
683 Gaeckle, Julia Ledbetter, Kate Sherman, Olivia Hannah, Melissa Sanchez, and Lauren Johnson.  
684 We thank Tarang Khangaonkar, Christopher Krembs and Julia Bos for providing environmental  
685 data and manuscript review. We thank Cathy Pfister and Megan Dethier for insightful comments  
686 on earlier versions of this manuscript. HB designed the study, collected and analyzed the data,  
687 and wrote the paper with input from all authors. TM, BC, MC, LF, EG and NV collected and  
688 analyzed data and contributed to writing. PD assisted with analysis and writing.

689

## 690 **References**

691

- 692 1. Pauly D. Anecdotes and the shifting baseline syndrome of fisheries. *Trends in Ecology &*  
693 *Evolution*. 1995; 10(10): 1. [https://doi.org/10.1016/S0169-5347\(00\)89171-5](https://doi.org/10.1016/S0169-5347(00)89171-5).
- 694 2. Bromberg KD, Bertness MD. Reconstructing New England salt marsh losses using historical  
695 maps. *Estuaries*. 2005; 28(6): 823-32. <https://doi.org/10.1007/BF02696012>.
- 696 3. Rothschild BJ, Ault JS, Gouletquer P, Heral M. Decline of the Chesapeake Bay oyster population:  
697 A century of habitat destruction and overfishing. *Mar Ecol ProgSer*. 1994; 111: 29-39. [https://www.int-](https://www.int-res.com/articles/meps/111/m111p029.pdf)  
698 [res.com/articles/meps/111/m111p029.pdf](https://www.int-res.com/articles/meps/111/m111p029.pdf).
- 699 4. McClenahan L, O'Connor G, Neal BP, Pandolfi JM, Jackson JBC. Ghost reefs: Nautical charts  
700 document large spatial scale of coral reef loss over 240 years. *Science advances*. 2017; 3(9): e1603155-e.  
701 <https://doi.org/10.1126/sciadv.1603155>. PubMed PMID: 28913420.
- 702 5. Pfister CA, Berry HD, Mumford T. The dynamics of Kelp Forests in the Northeast Pacific Ocean  
703 and the relationship with environmental drivers. *Journal of Ecology*. 2018; 106: 1520-33.  
704 <https://doi.org/10.1111/1365-2745.12908>.



- 705 6. Steneck RS, Graham MH, Bourque BJ, Corbett D, Erlandson JM, Estes JA, et al. Kelp forest  
706 ecosystems: biodiversity, stability, resilience and future. *Environmental Conservation*. 2002; 29(04): 436-  
707 59. <https://doi.org/10.1017/S0376892902000322>.
- 708 7. Wernberg T, Krumhansl K, Filbee-Dexter K, Pedersen MF. Chapter 3 - Status and Trends for the  
709 World's Kelp Forests. In: Sheppard C, editor. *World Seas: an Environmental Evaluation (Second Edition)*:  
710 Academic Press; 2019. p. 57-78. <https://doi.org/10.1016/B978-0-12-805052-1.00003-6>.
- 711 8. Eckman J, Duggins D, Sewell A. Ecology of understory kelp environments. I. Effects of kelps on  
712 flow and particle transport near the bottom. *Journal of Experimental Marine Biology and Ecology* 1989;  
713 129: 173-87. [https://doi.org/10.1016/0022-0981\(89\)90055-5](https://doi.org/10.1016/0022-0981(89)90055-5).
- 714 9. Pfister CA, Altabet MA, Weigel BL. Kelp beds and their local effects on seawater chemistry,  
715 productivity, and microbial communities. *Ecology*. 2019; 100(10): e02798.  
716 <https://doi.org/10.1002/ecy.2798>.
- 717 10. Krumhansl KA, Scheibling RE. Production and fate of kelp detritus. *Mar Ecol Prog Ser*. 2012; 467:  
718 281-302. <https://doi.org/10.3354/meps09940>.
- 719 11. Mann KH. Seaweeds - their productivity and strategy for growth. *Science*. 1973; 182(4116): 975-  
720 81. <https://doi.org/10.1126/science.182.4116.975>. PubMed PMID: 17833778.
- 721 12. Dayton PK. The ecology of kelp communities. *Annual Review of Ecology and Systematics*. 1985;  
722 16: 215-45. <https://doi.org/10.1146/annurev.es.16.110185.001243>.
- 723 13. Filbee-Dexter K, Feehan CJ, Scheibling RE. Large-scale degradation of a kelp ecosystem in an  
724 ocean warming hotspot. *Mar Ecol Prog Ser*. 2016; 543: 141-52. <https://doi.org/10.3354/meps11554>.
- 725 14. Dayton PK, Tegner MJ, Edwards PB, Riser KL. Temporal and spatial scales of kelp demography:  
726 The role of oceanographic climate. *Ecological Monographs*. 1999; 69(2): 219-50.  
727 [https://doi.org/10.1890/0012-9615\(1999\)069\[0219:TASSOK\]2.0.CO;2](https://doi.org/10.1890/0012-9615(1999)069[0219:TASSOK]2.0.CO;2).
- 728 15. Cavanaugh KC, Siegel DA, Reed DC, Dennison PE. Environmental controls of giant-kelp biomass  
729 in the Santa Barbara Channel, California. *Mar Ecol Prog Ser*. 2011; 429: 1-17.  
730 <https://doi.org/10.3354/meps09141>.
- 731 16. Poore AGB, Campbell AH, Coleman RA, Edgar GJ, Jormalainen V, Reynolds PL, et al. Global  
732 patterns in the impact of marine herbivores on benthic primary producers. *Ecology Letters*. 2012; 15(8):  
733 912-22. <https://doi.org/10.1111/j.1461-0248.2012.01804.x>.
- 734 17. Duggins DO. Kelp beds and sea otters: an experimental approach. *Ecology*. 1980; 61: 447-53.  
735 <https://doi.org/10.2307/1937405>.
- 736 18. Steneck RS, Leland A, McNaught DC, Vavrinec J. Ecosystem flips, locks, and feedbacks: the  
737 lasting effects of fisheries on Maine's kelp forest ecosystem. *Bulletin of Marine Science*. 2013; 89(1): 31-  
738 55. <https://doi.org/10.5343/bms.2011.1148>.
- 739 19. Krumhansl KA, Okamoto DK, Rassweiler A, Novak M, Bolton JJ, Cavanaugh KC, et al. Global  
740 patterns of kelp forest change over the past half-century. *Proceedings of the National Academy of*  
741 *Sciences*. 2016; 113(48): 13785. <https://doi.org/10.1073/pnas.1606102113>.
- 742 20. Filbee-Dexter K, Wernberg T. Rise of Turfs: A New Battlefield for Globally Declining Kelp Forests.  
743 *BioScience*. 2018; 68(2): 64-76. <https://doi.org/10.1093/biosci/bix147>.
- 744 21. Wernberg T, Bennett S, Babcock RC, de Bettignies T, Cure K, Depczynski M, et al. Climate-driven  
745 regime shift of a temperate marine ecosystem. *Science*. 2016; 353(6295): 169.  
746 <https://doi.org/10.1126/science.aad8745>.
- 747 22. Moy FE, Christie H. Large-scale shift from sugar kelp (*Saccharina latissima*) to ephemeral algae  
748 along the south and west coast of Norway. *Marine Biology Research*. 2012; 8(4): 309-21.  
749 <https://doi.org/10.1080/17451000.2011.637561>.
- 750 23. Connell SD, Russell BD. The direct effects of increasing CO2 and temperature on non-calcifying  
751 organisms: increasing the potential for phase shifts in kelp forests. *Proceedings of the Royal Society B:*  
752 *Biological Sciences*. 2010; 277(1686): 1409-15. <https://doi.org/10.1098/rspb.2009.2069>.

- 753 24. Rubin SP, Miller IM, Foley MM, Berry HD, Duda JJ, Hudson B, et al. Increased sediment load  
754 during a large-scale dam removal changes nearshore subtidal communities. Plos One. 2017; 12(12).  
755 <https://doi.org/10.1371/journal.pone.0187742>. PubMed PMID: WOS:000417469900006.
- 756 25. Britton-Simmons KH. Direct and indirect effects of the introduced alga *Sargassum muticum* on  
757 benthic, subtidal communities of Washington State, USA. Mar Ecol Prog Ser. 2004; 277: 61-78.  
758 <https://doi.org/10.3354/meps277061>.
- 759 26. Straub SC, Wernberg T, Thomsen MS, Moore PJ, Burrows MT, Harvey BP, et al. Resistance,  
760 extinction, and everything in between – the diverse responses of seaweeds to marine heatwaves.  
761 Frontiers in Marine Science. 2019; 6(763). <https://doi.org/10.3389/fmars.2019.00763>.
- 762 27. Calloway M, Oster D, Mumford Jr. TF, Berry H. Puget Sound kelp conservation and recovery plan  
763 (public review draft). Olympia, WA: Northwest Straits Commission; 2019. p. 52. Available from:  
764 [https://www.nwstraits.org/media/2880/pugetsoundkelpconservationandrecoveryplan\\_public\\_review\\_d  
765 raft\\_1219.pdf](https://www.nwstraits.org/media/2880/pugetsoundkelpconservationandrecoveryplan_public_review_draft_1219.pdf).
- 766 28. Spalding MD, Fox HE, Allen GR, Robertson J, et al. Marine ecoregions of the world: a  
767 bioregionalization of coastal and shelf areas. BioScience. 2007; 57(7): 573-83.  
768 <https://doi.org/10.1641/B570707>.
- 769 29. Gabrielson PW, Lindstrom SC. Keys to the Seaweeds and Seagrasses of Southeast Alaska, British  
770 Columbia, Washington, and Oregon. Vancouver, British Columbia: University of British Columbia; 2018.  
771 180 p. Available from: [https://alliance-primo.hosted.exlibrisgroup.com/primo-  
772 explore/search?tab=default\\_tab&search\\_scope=all&vid=UW&fn=search&query=Isr02,contains,1036987  
773 349&lang=en\\_US](https://alliance-primo.hosted.exlibrisgroup.com/primo-explore/search?tab=default_tab&search_scope=all&vid=UW&fn=search&query=Isr02,contains,1036987349&lang=en_US).
- 774 30. Berry HD, Harper JR, Mumford Jr. TF, Bookheim BE, Sewell AT, Tamayo LJ. The Washington State  
775 ShoreZone Inventory User's Manual. Olympia, WA: Nearshore Habitat Program, Washington State  
776 Department of Natural Resources; 2001. Available from: [https://www.dnr.wa.gov/programs-and-  
777 services/aquatics/aquatic-science/nearshore-habitat-publications](https://www.dnr.wa.gov/programs-and-services/aquatics/aquatic-science/nearshore-habitat-publications).
- 778 31. Mumford Jr. TF. Kelp and Eelgrass in Puget Sound. Seattle, WA: Seattle District, US Army Corps  
779 of Engineers; 2007. p. 27. Available from:  
780 [http://www.pugetsoundnearshore.org/technical\\_papers/kelp.pdf](http://www.pugetsoundnearshore.org/technical_papers/kelp.pdf).
- 781 32. Maxell BA, Miller KA. Demographic studies of the annual kelps *Nereocystis luetkana* and  
782 *Costaria costata* (Laminariales, Phaeophyta) in Puget Sound, Washington. Botanica Marina. 1996; 39(3):  
783 479-89.
- 784 33. Druehl LD. The pattern of Laminariales distribution in the northeast Pacific. Phycologia. 1970; 9:  
785 237-47. <https://doi.org/10.2216/i0031-8884-9-3-237.1>.
- 786 34. Duggins D, Eckman JE, Siddon CE, Klinger T. Interactive roles of mesograzers and current flow in  
787 survival of kelps. Mar Ecol Prog Ser. 2001; 223: 143-55. <https://doi.org/10.3354/meps223143>.
- 788 35. Carney LT, Edwards MS. Cryptic processes in the sea: a review of delayed development in the  
789 microscopic life stages of marine macroalgae. Algae. 2006; 21(2): 161-8.  
790 <https://doi.org/10.4490/ALGAE.2006.21.2.161>.
- 791 36. Muth AF, Graham MH, Lane CE, Harley CDG. Recruitment tolerance to increased temperature  
792 present across multiple kelp clades. Ecology. 2019; 100(3). <https://doi.org/10.1002/ecy.2594>.
- 793 37. Gierke L, San Miguel B, Mumford Jr. TF, Alberto F, editors. Genetic structure of the bull-kelp  
794 *Nereocystis luetkeana* in the Salish Sea. Salish Sea Ecosystem Conference; 2018 April 6, 2018; Seattle,  
795 WA: Western Washington University. Available from:  
796 <https://cedar.wvu.edu/cgi/viewcontent.cgi?article=2940&context=ssec>.
- 797 38. Weigel BL, Pfister CA. Successional Dynamics and Seascape-Level Patterns of Microbial  
798 Communities on the Canopy-Forming Kelps *Nereocystis luetkeana* and *Macrocystis pyrifera*. Frontiers in  
799 Microbiology. 2019; 10: 346. <https://doi.org/10.3389/fmicb.2019.00346>.

- 800 39. Shelton AO, Harvey CJ, Samhouri JF, Andrews KS, Feist BE, Frick KE, et al. From the predictable to  
801 the unexpected: kelp forest and benthic invertebrate community dynamics following decades of sea  
802 otter expansion. *Oecologia*. 2018. <https://doi.org/10.1007/s00442-018-4263-7>.
- 803 40. Starko S, Bailey LA, Creviston E, James KA, Warren A, Brophy MK, et al. Environmental  
804 heterogeneity mediates scale-dependent declines in kelp diversity on intertidal rocky shores. *PLOS ONE*.  
805 2019; 14(3): e0213191. <https://doi.org/10.1371/journal.pone.0213191>.
- 806 41. Burns R. The shape and form of Puget Sound. Seattle, WA: University of Washington Press;  
807 1985.
- 808 42. Strickland RM. The fertile fjord. Seattle, WA: University of Washington Press; 1983.
- 809 43. Khangaonkar T, Nugraha A, Xu W, Long W, Bianucci L, Ahmed A, et al. Analysis of hypoxia and  
810 sensitivity to nutrient pollution in Salish Sea. *Journal of Geophysical Research: Oceans*. 2018; 123: 4735–  
811 61. <https://doi.org/10.1029/2017JC013650>.
- 812 44. Albertson SL, Erickson K, Newton JA, Pelletier G, Reynolds RA, Roberts ML. South Puget Sound  
813 Water Quality Study: Phase 1. Environmental Assessment Program; 2002. p. 224 pgs. Available from:  
814 <https://fortress.wa.gov/ecy/publications/documents/0203021.pdf>.
- 815 45. Mohamedali F, Roberts MHR, Sackmann B, Whiley AJ, Kolosseus A. South Puget Sound dissolved  
816 oxygen study: interim nutrient load summary for 2006-2007. Olympia, WA: Washington State  
817 Department of Ecology; 2011. p. 179. Available from: [www.ecy.wa.gov/biblio/1103001.html](http://www.ecy.wa.gov/biblio/1103001.html)
- 818 46. US Coast Survey. Sailing directions for the west coast of North America embracing the coasts of  
819 Central America, California, Oregon, Fuca Strait, Puget Sound, Vancouver Island, and the islands and  
820 rocks off the coasts of Central America and California. London, England:1853. p. 239. Available from:  
821 [https://historicalcharts.noaa.gov/publications\\_cp](https://historicalcharts.noaa.gov/publications_cp).
- 822 47. Springer YP, Hays CG, Carr MH, Mackey MR. Toward Ecosystem-Based Management of Marine  
823 Macroalgae - the Bull Kelp, *Nereocystis Leutkeana*. *Oceanography and Marine Biology*. 2010; 48: 1-42.  
824 <https://doi.org/10.1201/EBK1439821169-c1>.
- 825 48. Orth RJ, Moore K. Distribution and abundance of submerged aquatic vegetation in Chesapeake  
826 Bay: an historical perspective. *Estuaries*. 1984; 7(4B): 531-40.
- 827 49. Ebbesmeyer CC, Jack WQ, Clifford BA. Puget Sound: A Fjord system homogenized with water  
828 recycled over sills by tidal mixing In: Kjerfve B, editor. *Hydrodynamics of Estuaries: II Estuarine Case*  
829 *Studies*. Boca Raton, FL: CRC Press; 1988. <https://doi.org/10.1201/9781351073264>.
- 830 50. Moore S, Mantua N, Kellogg J, Newton J. Local and large-scale climate forcing of Puget Sound  
831 oceanographic properties on seasonal to interdecadal time-scales. *LIMNOL OCEANOGR*. 2008; 53: 1746-  
832 58. <https://doi.org/10.4319/lo.2008.53.5.1746>.
- 833 51. Nearshore Habitat Program. The Washington State ShoreZone Inventory. Olympia, WA.:  
834 Washington State Department of Natural Resources; 2001. Available from:  
835 <https://www.dnr.wa.gov/programs-and-services/aquatics/aquatic-science/nearshore-habitat-inventory>.
- 836 52. Dethier M. A marine and estuarine habitat classification system for Washington State. Olympia,  
837 WA: Washington Natural Heritage Program, Department of Natural Resources; 1990. p. 56. Available  
838 from: [https://www.dnr.wa.gov/publications/aqr\\_nrsh\\_marine\\_class.pdf?734qo](https://www.dnr.wa.gov/publications/aqr_nrsh_marine_class.pdf?734qo).
- 839 53. Jepsen DJ, Norberg DJ. *Contested Boundaries: A New Pacific Northwest History*: John Wiley and  
840 Sons, Inc.; 2017. Available from: <https://books.google.com/books?id=xCUtDgAAQBAJ>.
- 841 54. U.S. Census Office. Report on the population of the United States at the eleventh census: 1890.  
842 Part 1. Washington, DC: Department of the Interior; 1895. Available from:  
843 <https://www.census.gov/library/publications/1895/dec/volume-1.html>.
- 844 55. Washington State Office of Financial Management. State of Washington: 2019 population  
845 trends. Olympia, WA: Washington State Office of Financial Management, Forecasting and Research  
846 Division; 2019. p. 50. Available from:  
847 [https://www.ofm.wa.gov/sites/default/files/public/dataresearch/pop/april1/ofm\\_april1\\_poptrends.pdf](https://www.ofm.wa.gov/sites/default/files/public/dataresearch/pop/april1/ofm_april1_poptrends.pdf).

- 848 56. Morgan M. Puget's Sound: a narrative of early Tacoma and southern sound. Seattle, WA:  
849 University of Washington Press; 1979. 160 p p. Available from:  
850 <https://uwapress.uw.edu/book/9780295744230/pugets-sound/>.
- 851 57. Melton R. The lumber industry of Washington: including logging, sawmills, shingle mills, pulp and  
852 paper, specialties, distribution. Tacoma, Washington: National Youth Administration of Washington;  
853 1939. Available from: <https://ir.library.oregonstate.edu/concern/defaults/vd66w522p>.
- 854 58. Simenstad C, Ramirez M, Burke J, Logsdon M, Shipman H, Tanner C, et al. Historical Change and  
855 Impairment of Puget Sound Shorelines. Seattle, WA: Puget Sound Ecosystem Restoration Project; 2011.  
856 p. 313. Available from: [http://www.pugetsoundnearshore.org/technical\\_papers/change\\_analysis.pdf](http://www.pugetsoundnearshore.org/technical_papers/change_analysis.pdf).
- 857 59. US Coast Survey. Topographic sheet. Register No. 1327a. Section XI, No. 1. Budd's Inlet, Wash.  
858 Ter. 1873. Available from: <http://riverhistory.ess.washington.edu/tsheets/framedex.htm>.
- 859 60. US Coast Survey. Topographic sheet. Register No. 1327b. Section XI. No. 2. Budd's Inlet, Wash.  
860 Ter. 1873. Available from: <http://riverhistory.ess.washington.edu/tsheets/framedex.htm>.
- 861 61. US Geological Survey. Hydrographic sheet. In: Thom, Ronald M. Hallum, Loann. 1990. Long-term  
862 changes in the areal extent of tidal marshes, eelgrass meadows and kelp forests of Puget Sound.  
863 Wetland Ecosystem Team, Fisheries Research Institute, University of Washington; 1875. p. 116.  
864 Available from: [https://www.dnr.wa.gov/publications/aqr\\_nrsh\\_thom\\_hallum\\_1990.pdf?7m1gy](https://www.dnr.wa.gov/publications/aqr_nrsh_thom_hallum_1990.pdf?7m1gy).
- 865 62. US Coast Survey. Topographic sheet. Register No. 1674. Section XI. Carrs Inlet, Wash. Ter. 1877-  
866 78. Available from: <http://riverhistory.ess.washington.edu/tsheets/framedex.htm>.
- 867 63. US Coast Survey. Topographic sheet. Register No. 1672. Section XI. Topography of Puget Sound,  
868 Wash. Ter. from Nisqually River to Totten Inlet. 1878. Available from:  
869 <http://riverhistory.ess.washington.edu/tsheets/framedex.htm>.
- 870 64. US Coast Survey. Topographic sheet. Register No. 1671. Section XI. Puget Sound: from Pt.  
871 Defiance to Ketron Isd. Washington Territory, 1877-78. 1878. Available from:  
872 <http://riverhistory.ess.washington.edu/tsheets/framedex.htm>.
- 873 65. US Coast and Geodetic Survey. Topographic sheet. Register No. 1528. Case's Inlet from it's head  
874 to Herron Island and Pickering Passage, Puget Sound. 1879-1880. Available from:  
875 <http://riverhistory.ess.washington.edu/tsheets/framedex.htm>.
- 876 66. US Geological Survey. Hydrographic sheet. In: Thom, Ronald M. Hallum, Loann. 1990. Long-term  
877 changes in the areal extent of tidal marshes, eelgrass meadows and kelp forests of Puget Sound.  
878 Wetland Ecosystem Team, Fisheries Research Institute, University of Washington; 1886. p. 116.  
879 Available from: [https://www.dnr.wa.gov/publications/aqr\\_nrsh\\_thom\\_hallum\\_1990.pdf?7m1gy](https://www.dnr.wa.gov/publications/aqr_nrsh_thom_hallum_1990.pdf?7m1gy).
- 880 67. Coast and Geodetic Survey. US Coast Pilot. 7, Pacific Coast: California, Oregon, Washington,  
881 Hawaii and Pacific Islands. In: Thom, Ronald M. Hallum, Loann. 1990. Long-term changes in the areal  
882 extent of tidal marshes, eelgrass meadows and kelp forests of Puget Sound. Wetland Ecosystem Team,  
883 Fisheries Research Institute, University of Washington; 1889. p. 116. Available from:  
884 [https://www.dnr.wa.gov/publications/aqr\\_nrsh\\_thom\\_hallum\\_1990.pdf?7m1gy](https://www.dnr.wa.gov/publications/aqr_nrsh_thom_hallum_1990.pdf?7m1gy).
- 885 68. US Geological Survey. Hydrographic sheet 6460. In: Thom, Ronald M. Hallum, Loann. 1990. Long-  
886 term changes in the areal extent of tidal marshes, eelgrass meadows and kelp forests of Puget Sound.  
887 Wetland Ecosystem Team, Fisheries Research Institute, University of Washington; 1891. p. 116.  
888 Available from: [https://www.dnr.wa.gov/publications/aqr\\_nrsh\\_thom\\_hallum\\_1990.pdf?7m1gy](https://www.dnr.wa.gov/publications/aqr_nrsh_thom_hallum_1990.pdf?7m1gy).
- 889 69. Cameron F. Potash from kelp. Washington, DC: US Govt. Print. Off.; 1915. Available from:  
890 <https://catalog.lib.uchicago.edu/vufind/Record/3318402>.
- 891 70. Coast and Geodetic Survey. US Coast Pilot. 7, Pacific Coast: California, Oregon, Washington,  
892 Hawaii and Pacific Islands. In: Thom, Ronald M. Hallum, Loann. 1990. Long-term changes in the areal  
893 extent of tidal marshes, eelgrass meadows and kelp forests of Puget Sound. Wetland Ecosystem Team,  
894 Fisheries Research Institute, University of Washington; 1926. p. 116. Available from:  
895 [https://www.dnr.wa.gov/publications/aqr\\_nrsh\\_thom\\_hallum\\_1990.pdf?7m1gy](https://www.dnr.wa.gov/publications/aqr_nrsh_thom_hallum_1990.pdf?7m1gy).

- 896 71. US Coast and Geodetic Survey. Hydrographic survey No. 5931. South End of Colvos Passage,  
897 Puget Sound, Washington. Department of Commerce; 1935. Available from:  
898 <https://maps.ngdc.noaa.gov/viewers/bathymetry/>.
- 899 72. US Coast and Geodetic Survey. Hydrographic survey No. 6102. Hale Passage, Puget Sound,  
900 Washington. Department of Commerce; 1935. Available from:  
901 <https://maps.ngdc.noaa.gov/viewers/bathymetry/>.
- 902 73. US Coast and Geodetic Survey. Hydrographic survey No. 6103. South End of Carr Inlet, Puget  
903 Sound, Washington. Department of Commerce; 1935. Available from:  
904 <https://maps.ngdc.noaa.gov/viewers/bathymetry/>.
- 905 74. US Coast and Geodetic Survey. Hydrographic survey No. 6104. Nisqually Reach to Fox Island,  
906 Puget Sound, Washington. Department of Commerce; 1935. Available from:  
907 <https://maps.ngdc.noaa.gov/viewers/bathymetry/>.
- 908 75. US Coast and Geodetic Survey. Hydrographic survey No. 6105. North End of Carr Inlet, Puget  
909 Sound, Washington. Department of Commerce; 1935. Available from:  
910 <https://maps.ngdc.noaa.gov/viewers/bathymetry/>.
- 911 76. US Coast and Geodetic Survey. Hydrographic Sheet Register No. 6106. Balch and Drayton  
912 Passages, Puget Sound, Washington. US Department of Commerce, National Oceanic and Atmospheric  
913 Administration; 1935. Available from: <https://maps.ngdc.noaa.gov/viewers/bathymetry/>.
- 914 77. US Coast and Geodetic Survey. Hydrographic Sheet Register No. 6107. Case Inlet, Puget Sound,  
915 Washington. US Department of Commerce, National Oceanic and Atmospheric Administration; 1935.  
916 Available from: <https://maps.ngdc.noaa.gov/viewers/bathymetry/>.
- 917 78. US Coast and Geodetic Survey. Hydrographic survey No. No. 6108. Case Inlet, Puget Sound,  
918 Washington. Department of Commerce; 1935. Available from:  
919 <https://maps.ngdc.noaa.gov/viewers/bathymetry/>.
- 920 79. US Coast and Geodetic Survey. Hydrographic survey No. 6197. Devils Head to Dana Passage and  
921 Henderson Inlet, Puget Sound, Washington. Department of Commerce; 1936. Available from:  
922 <https://maps.ngdc.noaa.gov/viewers/bathymetry/>.
- 923 80. US Coast and Geodetic Survey. Hydrographic survey No. 6198. Eld and Budd Inlets and Vicinity,  
924 Puget Sound, Washington. Department of Commerce; 1936. Available from:  
925 <https://maps.ngdc.noaa.gov/viewers/bathymetry/>.
- 926 81. US Coast and Geodetic Survey. Hydrographic survey No. 6199. Budd Inlet and Olympia Harbor,  
927 Washington. Department of Commerce; 1936. Available from:  
928 <https://maps.ngdc.noaa.gov/viewers/bathymetry/>.
- 929 82. US Coast and Geodetic Survey. Hydrographic survey No. 6202. Eld Inlet, Puget Sound,  
930 Washington. Department of Commerce; 1936. Available from:  
931 <https://maps.ngdc.noaa.gov/viewers/bathymetry/>.
- 932 83. US Coast and Geodetic Survey. Hydrographic survey No. 6203. Totten and Skookum Inlets, Puget  
933 Sound, Washington. Department of Commerce; 1936. Available from:  
934 <https://maps.ngdc.noaa.gov/viewers/bathymetry/>.
- 935 84. US Coast and Geodetic Survey. Hydrographic survey No. 6204. Pickering and Peale Passages,  
936 Puget Sound, Washington. Department of Commerce; 1936. Available from:  
937 <https://maps.ngdc.noaa.gov/viewers/bathymetry/>.
- 938 85. US Coast and Geodetic Survey. Hydrographic survey. No. 6205. Hamersley Inlet, Puget Sound,  
939 Washington. Department of Commerce; 1936. Available from:  
940 <https://maps.ngdc.noaa.gov/viewers/bathymetry/>.
- 941 86. Coast and Geodetic Survey. US Coast Pilot. 7, Pacific Coast: California, Oregon, Washington,  
942 Hawaii and Pacific Islands. In: Thom, Ronald M. Hallum, Loann. 1990. Long-term changes in the areal  
943 extent of tidal marshes, eelgrass meadows and kelp forests of Puget Sound. Wetland Ecosystem Team,

- 944 Fisheries Research Institute, University of Washington; 1951. p. 116. Available from:  
945 [https://www.dnr.wa.gov/publications/aqr\\_nrsh\\_thom\\_hallum\\_1990.pdf?7m1gy](https://www.dnr.wa.gov/publications/aqr_nrsh_thom_hallum_1990.pdf?7m1gy).
- 946 87. Washington State University. Kelp mapping in: Thom, Ronald M. Hallum, Loann. 1990. Long-  
947 term changes in the areal extent of tidal marshes, eelgrass meadows and kelp forests of Puget Sound.  
948 Wetland Ecosystem Team, Fisheries Research Institute, University of Washington; 1954. p. 116.  
949 Available from: [https://www.dnr.wa.gov/publications/aqr\\_nrsh\\_thom\\_hallum\\_1990.pdf?7m1gy](https://www.dnr.wa.gov/publications/aqr_nrsh_thom_hallum_1990.pdf?7m1gy).
- 950 88. Phillips R. Shallow subtidals surveys by scuba and snorkel at sites in Puget Sound for Seattle  
951 Pacific College and University of Washington. Seattle, WA:1962-63. p. 146. Available from:  
952 [http://https://www.dnr.wa.gov/publications/aqr\\_nrsh\\_phillips\\_dive\\_log\\_1962\\_1963.pdf?fm90e8](http://https://www.dnr.wa.gov/publications/aqr_nrsh_phillips_dive_log_1962_1963.pdf?fm90e8).
- 953 89. Harlin MM. A Phycological Survey of Steamboat Island, Thurston County, Washington State.  
954 Syesis. 1969; 2: 257-61.
- 955 90. National Ocean Service. Hydrographic Sheet Register No. 9682. Nisqually Reach. US Department  
956 of Commerce, National Oceanic and Atmospheric Administration; 1977. Available from:  
957 <https://maps.ngdc.noaa.gov/viewers/bathymetry/>.
- 958 91. Hodgson LM, Waaland JR. Seasonal variation in the subtidal macroalgae of Fox Island, Puget  
959 Sound Washington. Syesis. 1979; 12: 107-12.
- 960 92. Washington Department of Wildlife. Original field mapping of kelp for the Coastal Zone Atlas:  
961 Thom, Ronald M. Hallum, Loann. 1990. Long-term changes in the areal extent of tidal marshes, eelgrass  
962 meadows and kelp forests of Puget Sound. Wetland Ecosystem Team, Fisheries Research Institute,  
963 University of Washington; 1978. p. 116. Available from:  
964 [https://www.dnr.wa.gov/publications/aqr\\_nrsh\\_thom\\_hallum\\_1990.pdf?7m1gy](https://www.dnr.wa.gov/publications/aqr_nrsh_thom_hallum_1990.pdf?7m1gy).
- 965 93. Washington State Department of Fisheries. Kelp surveys 1975-1989. In: Thom, Ronald M.  
966 Hallum, Loann. 1990. Long-term changes in the areal extent of tidal marshes, eelgrass meadows and  
967 kelp forests of Puget Sound. Seattle, WA: Wetland Ecosystem Team, Fisheries Research Institute,  
968 University of Washington; 1975-1989. p. 116. Available from:  
969 [https://www.dnr.wa.gov/publications/aqr\\_nrsh\\_thom\\_hallum\\_1990.pdf?7m1gy](https://www.dnr.wa.gov/publications/aqr_nrsh_thom_hallum_1990.pdf?7m1gy).
- 970 94. West JE. Personal communication regarding observations of *Nereocystis luetkeana* by the  
971 Washington Department of Fish and Wildlife during rockfish surveys in South Puget Sound during the  
972 1992 field year. Olympia, WA: Washington Department of Fisheries; 1992. Available from:  
973 <https://uwapress.uw.edu/book/9780295744230/pugets-sound/>.
- 974 95. Nearshore Habitat Program. Boat-based canopy delineation of floating kelp canopy at Squaxin  
975 Island. In: Assessment of bull kelp at Squaxin Island in 2013, 2014 and 2016. In: Resources WSDoN,  
976 editor. Olympia, WA:1994. p. 39. Available from: [https://www.dnr.wa.gov/programs-and-](https://www.dnr.wa.gov/programs-and-services/aquatics/aquatic-science/nearshore-habitat-publications)  
977 [services/aquatics/aquatic-science/nearshore-habitat-publications](https://www.dnr.wa.gov/programs-and-services/aquatics/aquatic-science/nearshore-habitat-publications).
- 978 96. National Ocean Service. Hydrographic Sheet Descriptive Report. Register No. 10684. Dana  
979 Passage. US Department of Commerce, National Oceanic and Atmospheric Administration; 1996.  
980 Available from: <https://maps.ngdc.noaa.gov/viewers/bathymetry/>.
- 981 97. National Ocean Service. Hydrographic Sheet Descriptive Report. Register No. 10714. Nisqually  
982 Reach. US Department of Commerce, National Oceanic and Atmospheric Administration; 1996.  
983 Available from: <https://maps.ngdc.noaa.gov/viewers/bathymetry/>.
- 984 98. National Ocean Service. Hydrographic Sheet Register No. 10667. Wyckoff Shoal to Balch  
985 Passage. US Department of Commerce, National Oceanic and Atmospheric Administration; 1996.  
986 Available from: <https://maps.ngdc.noaa.gov/viewers/bathymetry/>.
- 987 99. National Ocean Service. Hydrographic Sheet Descriptive Report. Register No. 11042. Nisqually  
988 Reach. US Department of Commerce, National Oceanic and Atmospheric Administration; 2001.  
989 Available from: <https://maps.ngdc.noaa.gov/viewers/bathymetry/>.
- 990 100. Berry H. 2004 Color-infrared kelp survey at Squaxin Island. In: Assessment of bull kelp at Squaxin  
991 Island in 2013, 2014 and 2016. Olympia, WA: Washington State Department of Natural Resources

- 992 Nearshore Habitat Program; 2004. p. 39. Available from: [https://www.dnr.wa.gov/programs-and-](https://www.dnr.wa.gov/programs-and-services/aquatics/aquatic-science/nearshore-habitat-publications)  
993 [services/aquatics/aquatic-science/nearshore-habitat-publications](https://www.dnr.wa.gov/programs-and-services/aquatics/aquatic-science/nearshore-habitat-publications).
- 994 101. National Ocean Service. Hydrographic Sheet Descriptive Report. Registry No. 11550. Southern  
995 Portion of Colvos Passage. US Department of Commerce, National Oceanic and Atmospheric  
996 Administration; 2008. Available from: <https://maps.ngdc.noaa.gov/viewers/bathymetry/>.
- 997 102. Berry H. Assessment of bull kelp at Squaxin Island in 2013, 2014 and 2016. Olympia, WA:  
998 Washington State Department of Natural Resources Nearshore Habitat Program; 2017. p. 39. Available  
999 from: [https://www.dnr.wa.gov/programs-and-services/aquatics/aquatic-science/nearshore-habitat-](https://www.dnr.wa.gov/programs-and-services/aquatics/aquatic-science/nearshore-habitat-publications)  
1000 [publications](https://www.dnr.wa.gov/programs-and-services/aquatics/aquatic-science/nearshore-habitat-publications).
- 1001 103. Berry H, Calloway M, Ledbetter J. Bull kelp monitoring in South Puget Sound in 2017 and 2018.  
1002 Olympia, WA: Washington State Department of Natural Resources Nearshore Habitat Program; 2019. p.  
1003 72. Available from: [https://www.dnr.wa.gov/programs-and-services/aquatics/aquatic-](https://www.dnr.wa.gov/programs-and-services/aquatics/aquatic-science/nearshore-habitat-publications)  
1004 [science/nearshore-habitat-publications](https://www.dnr.wa.gov/programs-and-services/aquatics/aquatic-science/nearshore-habitat-publications).
- 1005 104. Betcher C, Williams B. Impact of Mooring Buoy Installations on Eelgrass and Macro Algae.
- 1006 105. Foreman RE. Studies on Nereocystis growth in British Columbia, Canada. Hydrobiologia. 1984;  
1007 116/117: 325-32. <https://doi.org/10.1007/BF00027696>.
- 1008 106. Britton-Simmons KH, Eckman JE, Duggins DO. Effect of tidal currents and tidal stage on  
1009 estimates of bed size in the kelp Nereocystis luetkeana. Mar Ecol Prog Ser. 2008; 355: 95-105.  
1010 <https://doi.org/10.3354/meps07209>.
- 1011 107. Nysewander DR, Evenson JR, Murphie BL, Cyra TA. Report of Marine Bird and Marine Mammal  
1012 Component, Puget Sound Ambient Monitoring Program for July 1992 to December 1999 Period. .  
1013 Olympia, Washington: Washington State Department of Fish and Wildlife; 2005. p. 194. Available from:  
1014 <https://wdfw.wa.gov/publications/01135>.
- 1015 108. ESRI. ArcGIS. Redlands, CA2019. Available from: <https://www.esri.com/en-us/home>.
- 1016 109. Shalowitz A. Shore and sea boundaries. Washington, DC: US Department of Commerce US Coast  
1017 and Geodetic Survey; 1964. Available from: [https://nauticalcharts.noaa.gov/about/docs/history-of-](https://nauticalcharts.noaa.gov/about/docs/history-of-coast-survey/shore-and-sea-boundaries-volume-two.pdf)  
1018 [coast-survey/shore-and-sea-boundaries-volume-two.pdf](https://nauticalcharts.noaa.gov/about/docs/history-of-coast-survey/shore-and-sea-boundaries-volume-two.pdf).
- 1019 110. Collins BD, Sheikh AJ. Historical reconstruction, classification and change analysis of Puget Sound  
1020 tidal marshes. University of Washington Puget Sound River History Project Department of Earth and  
1021 Space Sciences. Olympia, WA: Washington Department of Natural Resources; 2005. Available from:  
1022 [http://www.pugetsoundnearshore.org/supporting\\_documents/historical\\_shoreline\\_dnr.pdf](http://www.pugetsoundnearshore.org/supporting_documents/historical_shoreline_dnr.pdf).
- 1023 111. Youngmann C. Coastal zone atlas of Washington. Olympia, WA: Washington Department of  
1024 Ecology and University of Washington Cartographic Laboratory; 1978. Available from:  
1025 <https://searchworks.stanford.edu/view/2373183>.
- 1026 112. Roberts MJ, Bos J, Albertson S, . South Puget Sound Dissolved Oxygen Study: Interim Data  
1027 Report. Washington State Department of Ecology; 2008. Available from:  
1028 [www.ecy.wa.gov/biblio/0803037.html](http://www.ecy.wa.gov/biblio/0803037.html).
- 1029 113. Bos J, Keyzers M, Haermanson L, Krembs C, Albertson S. Quality Assurance Monitoring Plan:  
1030 long-term marine waters monitoring, water column program. Olympia, WA: Washington Department of  
1031 Ecology; 2015. p. 200. Available from:  
1032 <https://fortress.wa.gov/ecy/publications/SummaryPages/1503101.html>.
- 1033 114. Khangaonkar T, Sackmann B, Long W, Mohamedali T, Roberts M. Simulation of annual  
1034 biogeochemical cycles of nutrient balance, phytoplankton bloom(s), and DO in Puget Sound using an  
1035 unstructured grid model. Ocean Dynamics. 2012; 62(9): 1353-79. [https://doi.org/10.1007/s10236-012-](https://doi.org/10.1007/s10236-012-0562-4)  
1036 [0562-4](https://doi.org/10.1007/s10236-012-0562-4).
- 1037 115. Khangaonkar T, Long W, Xu W. Assessment of circulation and inter-basin transport in the Salish  
1038 Sea including Johnstone Strait and Discovery Islands pathways. Ocean Modelling. 2017: 11-32.  
1039 <https://doi.org/10.1016/j.ocemod.2016.11.004>. PubMed PMID: WN0219060.

- 1040 116. VanArendonk NR. Assessing coastal vulnerability to storm surge and wave impacts with  
1041 projected sea level rise within the Salish Sea. Bellingham, WA: Western Washington University; 2019.  
1042 Available from: <https://cedar.wvu.edu/wwuet/901/>.
- 1043 117. National Centers for Environmental Prediction/National Weather Service/NOAA US Department  
1044 of Commerce. NCEP/NCAR Reanalysis Monthly Mean Subsets (from D5090.0), 1948-continuing:  
1045 Research Data Archive at the National Center for Atmospheric Research, Computational and Information  
1046 Systems Laboratory. 1996. Available from: <http://rda.ucar.edu/datasets/ds090.2/>.
- 1047 118. Skamarock WC, Klemp JB, Dudhia J, Gill DO, Barker DM, Duda MG, et al. A description of the  
1048 advanced research WRF Version 3 (No. NCAR/TN-475+STR). NCAR Technical Note. Boulder, CO, USA.:  
1049 National Center for Atmospheric Research; 2008. Available from:  
1050 <https://opensky.ucar.edu/islandora/object/technotes:500>.
- 1051 119. R CoreTeam. R: A language and environment for statistical computing. Vienna, Austria: R  
1052 Foundation for Statistical Computing; 2016. Available from: <http://www.R-project.org/>.
- 1053 120. Russell L, Singmann H, Love J, Buerkner P, Herve M. emmeans: Estimated Marginal Means, aka  
1054 Least-Squares Means. R Package version 1.4.3.01. 2019. Available from: [https://CRAN.R-](https://CRAN.R-project.org/package=emmeans)  
1055 [project.org/package=emmeans](https://CRAN.R-project.org/package=emmeans)
- 1056 121. Peters G-J, Verboon P, Green J. userfriendlyscience: Quantitative Analysis Made Accessible.  
1057 Version 0.7.2. 2018. Available from: <http://userfriendlyscience.com>.
- 1058 122. Druehl LD. Distribution of two species of Laminaria as related to some environmental factors  
1059 Journal of Phycology. 1967; 3: 103–8. <https://doi.org/10.1111/j.1529-8817.1967.tb04641.x>.
- 1060 123. Druehl LD. The distribution of *Macrocystis integrifolia* in British Columbia as related to  
1061 environmental parameters. Canadian Journal of Botany. 1978; 56: 69–79. [https://doi.org/10.1139/b78-](https://doi.org/10.1139/b78-007)  
1062 [007](https://doi.org/10.1139/b78-007).
- 1063 124. Schiel DR, Foster MS. The biology and ecology of giant kelp forests. . Oakland, CA: University of  
1064 California Press; 2015.
- 1065 125. Capone DG, Hutchins DA. Microbial biogeochemistry of coastal upwelling regimes in a changing  
1066 ocean. Nature Geoscience. 2013; 6(9): 711-7. <https://doi.org/10.1038/ngeo1916>.
- 1067 126. Pfister CA, Wootton JT, Neufeld CJ. The relative roles of coastal and oceanic processes in  
1068 determining physical and chemical characteristics of an intensively sampled nearshore system.  
1069 Limnology and Oceanography. 2007; 52(5): 1767-75. <https://doi.org/10.4319/lo.2007.52.5.1767>.
- 1070 127. Pfister CA, Altabet MA, Post D. Animal regeneration and microbial retention of nitrogen along  
1071 coastal rocky shores. Ecology. 2014; 95(10): 2803-14. <https://doi.org/10.1890/13-1825.1>.
- 1072 128. Schiel DR, J.R. Steinbeck and M.S. Foster. Ten years of induced ocean warming causes  
1073 comprehensive changes in marine benthic communities. Ecology. 2004; 85(7): 1833-9.  
1074 <https://esajournals.onlinelibrary.wiley.com/doi/10.1890/03-3107>.
- 1075 129. Tegner MJ, Dayton PK. El Nino effects on southern California kelp forest communities. Advances  
1076 in Ecological Research. 1987; 17: 243-79.  
1077 <https://www.sciencedirect.com/science/article/pii/S0065250408602470>.
- 1078 130. Schiltroth B, Bisgrove S, Heath B, editors. Effects of warm ocean temperatures on bull kelp  
1079 forests in the Salish Sea. Salish Sea Ecosystem Conference; 2018 April 4, 2018; Seattle, WA. Available  
1080 from: <https://cedar.wvu.edu/ssec/2018ssec/allsessions/515/>.
- 1081 131. Gaitán-Espitia JD, Hancock JR, Padilla-Gamiño JL, Rivest EB, Blanchette CA, Reed DC, et al.  
1082 Interactive effects of elevated temperature and pCO<sub>2</sub> on early-life-history stages of the giant kelp  
1083 *Macrocystis pyrifera*. Journal of Experimental Marine Biology and Ecology. 2014; 457: 51-8.  
1084 <https://doi.org/10.1016/j.jembe.2014.03.018>.
- 1085 132. Stephens TA, Hepburn CD. A kelp with integrity: *Macrocystis pyrifera* prioritises tissue  
1086 maintenance in response to nitrogen fertilisation. Oecologia. 2016; 182: 71–84  
1087 <https://doi.org/10.1007/s00442-016-3641-2>



- 1088 133. Dean T, Jacobsen F. Nutrient-limited growth of juvenile kelp, *Macrocystis pyrifera*, during the  
1089 1982–1984 “El Niño” in southern California. *Mar Biol.* 1986; 90: 597–601.  
1090 <https://doi.org/10.1007/BF00391242>.
- 1091 134. Mohamedali T, Roberts ML, Sackman B, Kolosseus A. Puget Sound Dissolved Oxygen Model:  
1092 Nutrient Load Summary for 1999-2008. Olympia, Washington: Washington State Department of Ecology;  
1093 2011. p. 144. Available from: <https://fortress.wa.gov/ecy/publications/summarypages/1103057.html>.
- 1094 135. Howarth RW, Sharpley A, Walker D. Sources of nutrient pollution to coastal waters in the United  
1095 States: Implications for achieving coastal water quality goals *Estuaries and Coasts.* 2002; 25(4): 1559-  
1096 2731. [www.jstor.org/stable/1353025](http://www.jstor.org/stable/1353025).
- 1097 136. Krembs C. Eutrophication in Puget Sound. 2013. In: State of Physical, Biological, and Selected  
1098 Fishery Resources of Pacific Canadian Marine Ecosystems in 2012 [Internet]. DFO Canadian Science  
1099 Advisory Secretariat Research Document; [106-12]. Available from: [http://www.dfo-mpo.gc.ca/Csas-](http://www.dfo-mpo.gc.ca/Csas-sccs/publications/resdocs-docrech/2013/2013_032-eng.pdf)  
1100 [sccs/publications/resdocs-docrech/2013/2013\\_032-eng.pdf](http://www.dfo-mpo.gc.ca/Csas-sccs/publications/resdocs-docrech/2013/2013_032-eng.pdf).
- 1101 137. Krembs C, M. Dutch, Partridge V, Weakland S, Bos J, Albertson S, et al. Changes in nutrient ratios  
1102 drive changes in pelagic and benthic assemblages, and benthic-pelagic coupling in Puget Sound: A  
1103 compelling hypothesis linking water quality and the benthos. *Salish Sea Ecosystem Conference*; April  
1104 30–May 2, 2014.; Seattle, WA2014. Available from:  
1105 <https://fortress.wa.gov/ecy/publications/documents/1403024.pdf>.
- 1106 138. Hurd CL, Harrison PJ, Bischof K, Lobban CS. *Seaweed Ecology and Physiology.* 2 ed. Cambridge:  
1107 Cambridge University Press; 2014. Available from: [https://www.cambridge.org/core/books/seaweed-](https://www.cambridge.org/core/books/seaweed-ecology-and-physiology/03C6C5D9B88980CA0C4F0863E0472233)  
1108 [ecology-and-physiology/03C6C5D9B88980CA0C4F0863E0472233](https://www.cambridge.org/core/books/seaweed-ecology-and-physiology/03C6C5D9B88980CA0C4F0863E0472233).
- 1109 139. Dobkowski K, Kobelt J, Brentin S, Van Alstyne KL, Dethier MN. Picky Pugettia: a tale of two kelps.  
1110 *Mar Biol.* 2017; 164(210). <https://doi.org/10.1007/s00227-017-3244-4>.
- 1111 140. Dobkowski K. The role of kelp crabs as consumers in bull kelp forests—evidence from  
1112 laboratory feeding trials and field enclosures. *PeerJ* 2017; 5: e3372.  
1113 <https://doi.org/10.7717/peerj.3372>.
- 1114 141. Airoidi L, Cinelli F. Effects of sedimentation on subtidal macroalgal assemblages: an  
1115 experimental study from a Mediterranean rocky shore. *Journal of Experimental Marine Biology and*  
1116 *Ecology.* 1997; 215(2): 269-88. [https://doi.org/10.1016/S0022-0981\(96\)02770-0](https://doi.org/10.1016/S0022-0981(96)02770-0).
- 1117 142. Airoidi L. Roles of disturbance, sediment stress, and substratum retention on spatial dominance  
1118 in algal turf. *Ecology.* 1998; 79(8): 2759-70. [https://doi.org/10.1890/0012-](https://doi.org/10.1890/0012-9658(1998)079[2759:RODSSA]2.0.CO;2)  
1119 [9658\(1998\)079\[2759:RODSSA\]2.0.CO;2](https://doi.org/10.1890/0012-9658(1998)079[2759:RODSSA]2.0.CO;2). PubMed PMID: ISI:000077501000014.
- 1120 143. Seapy R, Littler M. Population and species diversity fluctuations in a rocky intertidal community  
1121 relative to severe aerial exposure and sediment burial. *Mar Biol* 1982; 71: 87-96.  
1122 <https://doi.org/10.1007/BF00396995>.
- 1123 144. Schiel DR, Foster MS. The population biology of large brown seaweeds: Ecological consequences  
1124 of multiphase life histories in dynamic coastal environments. *Annu Rev Ecol Evol Syst.* 2006; 37: 343-72.  
1125 <https://doi.org/10.1146/annurev.ecolsys.37.091305.110251>. PubMed PMID: ISI:000243038500013.
- 1126 145. Palsson WA, Tsou TT, Bargmann GG, Buckley RM, West JE, Mills ML, et al. The biology and  
1127 assessment of rockfishes in Puget Sound. Olympia, WA: Washington Department of Fish and Wildlife;  
1128 2009. Available from: <https://wdfw.wa.gov/publications/00926>.
- 1129 146. Wayne A. Palsson, Thomas J. Northup, Barker MW. Puget Sound groundfish management plan.  
1130 Olympia, WA: Washington Department of Fish and Wildlife; 1998. p. 48. Available from:  
1131 <https://wdfw.wa.gov/sites/default/files/publications/00927/wdfw00927.pdf>.
- 1132 147. National Marine Fisheries Service. Endangered and Threatened Species: Final listing  
1133 determination for 16 ESUs of West Coast salmon, and final 4(d) protective regulations for threatened  
1134 ESUs. 2005. Available from: <https://www.federalregister.gov/documents/2005/06/28/05->

- 1135 [12351/Endangered-and-threatened-species-final-listing-determinations-for-16-esus-of-west-coast-](#)  
1136 [salmon-and.](#)
- 1137 148. Greene C, Kuehne L, Rice CA, Fresh K, Penttila D. Forty years of change in forage fish and jellyfish  
1138 abundance across greater Puget Sound Washington (USA): anthropogenic and climate associations.  
1139 Marine Ecology Progress Series. 2015; 525: 153-70. <https://doi.org/10.3354/meps11251>.
- 1140 149. Davenport AC, Anderson TW. Positive Indirect Effects of Reef Fishes on Kelp Performance: The  
1141 Importance of Mesograzers. Ecology. 2007; 88(6): 1548-61. [www.jstor.org/stable/27651261](http://www.jstor.org/stable/27651261).
- 1142 150. Gaylord B, Nickols KJ, Jurgens L. Roles of transport and mixing processes in kelp forest ecology.  
1143 The Journal of Experimental Biology. 2012; 215(6): 997. <https://doi.org/10.1242/jeb.059824>.
- 1144 151. Hare SR, Mantua NJ. Empirical evidence for North Pacific regime shifts in 1977 and 1989.  
1145 Progress in Oceanography. 2000; 47(2): 103-45. [https://doi.org/10.1016/S0079-6611\(00\)00033-1](https://doi.org/10.1016/S0079-6611(00)00033-1).
- 1146 152. Gentemann CL, Fewings MR, García-Reyes M. Satellite sea surface temperatures along the West  
1147 Coast of the United States during the 2014–2016 northeast Pacific marine heat wave. Geophysical  
1148 Research Letters. 2017; 44(1): 312-9. <https://doi.org/10.1002/2016GL071039>.
- 1149 153. Frölicher TL, Fischer EM, Gruber N. Marine heatwaves under global warming. Nature. 2018;  
1150 560(7718): 360-4. <https://doi.org/10.1038/s41586-018-0383-9>.

1151

## 1152 **Supporting Information**

1153 **S1 File. Data used in this study.** Excel spreadsheet with data used in all analyses.

1154 **S1 Text Comparison of synoptic survey methods and results.**

1155 **S1 Fig. Distribution of the length of individual *Nereocystis* features in comprehensive snapshot**  
1156 **surveys.** The distribution of kelp bed feature length in six comprehensive surveys, ranging from a median  
1157 of less than 0.1 km (2017) to 1.5 km (1911). Differences in length are likely to be related to both survey  
1158 resolution and actual length of kelp features.

1159 **S2 Fig. Linear extent of shoreline with *Nereocystis* present between 1876 and 2017, based on six**  
1160 **comprehensive snapshot surveys, summarized over three sub-basins.** Recent estimates (1998 and  
1161 2017) are dramatically reduced relative to estimates in 1876, 1935 and 1978. The 1911 estimate could  
1162 represent a low point in kelp extent, but likely reflects methodological differences in survey methods.  
1163 This depiction of linear extent shows similar results as the number of 1-km segments with *Nereocystis*  
1164 present (Fig 4).

1165 **S3 Fig. Nearshore temperature profiles on July 18, 2018 at seven sites in SPS.** Casts were collected at  
1166 approximately – 6 m (MLLW). At Squaxin Island, Devil’s Head, Day Island and Salmon Beach, three  
1167 casts were collected, at stations in the center of the site and near the alongshore site boundaries. At other  
1168 sites, single casts were collected at the center of the site. During this summer period of maximum  
1169 expected stratification, the profiles showed little change in temperature with depth. Multiple casts at up to  
1170 three stations per site, showed similar values within site and a gradual gradient among sites.

1171

# Most Recent *Nereocystis* Observation

- < 1880
- 1881 - 1940
- 1941 - 1960
- 1961 - 1980
- 1981 - 2000
- > 2000

0 2.5 5 km

bioRxiv preprint doi: <https://doi.org/10.1101/2020.02.13.947309>; this version posted February 13, 2020. The copyright holder for this preprint (which was not certified by peer review) is the author/funder. This article is a US Government work. It is not subject to copyright under 17 USC 105 and is also made available for use under a CC0 license.

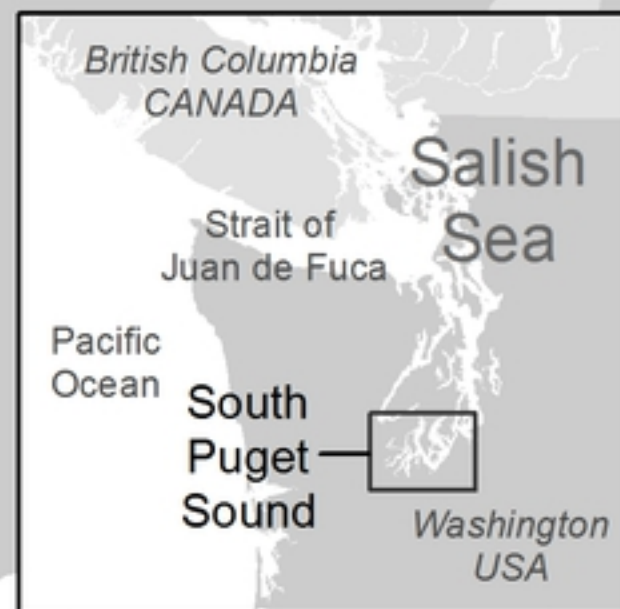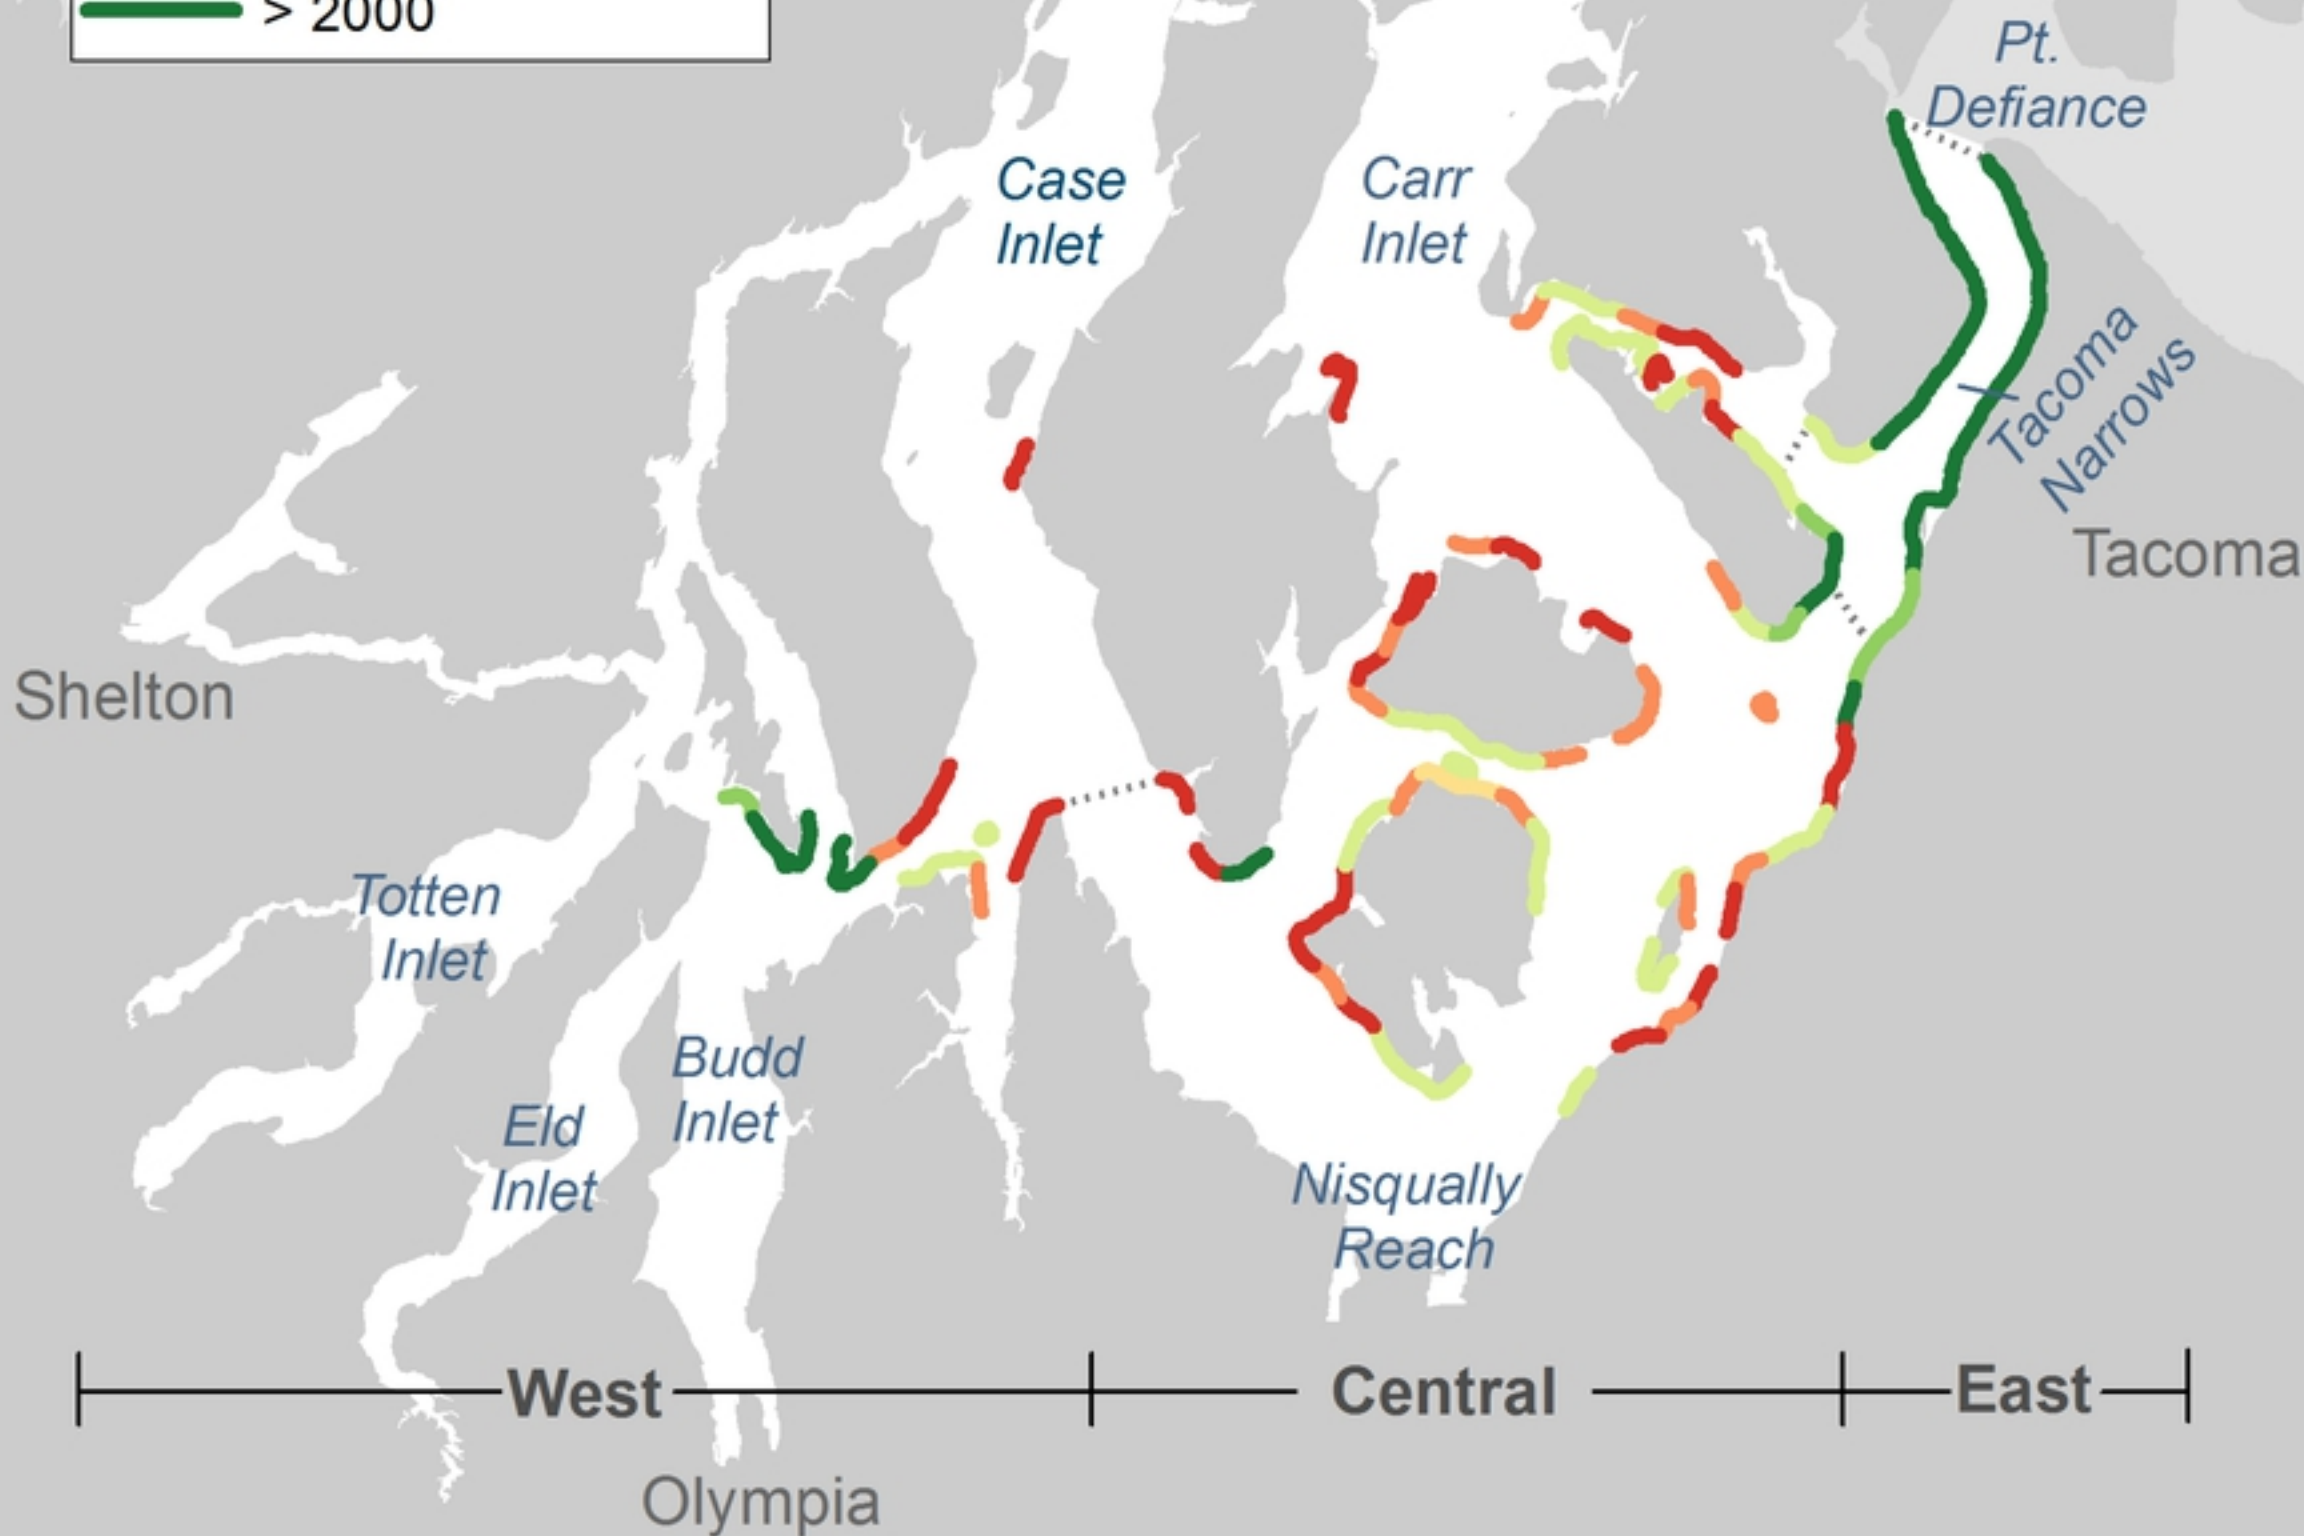

figure 1

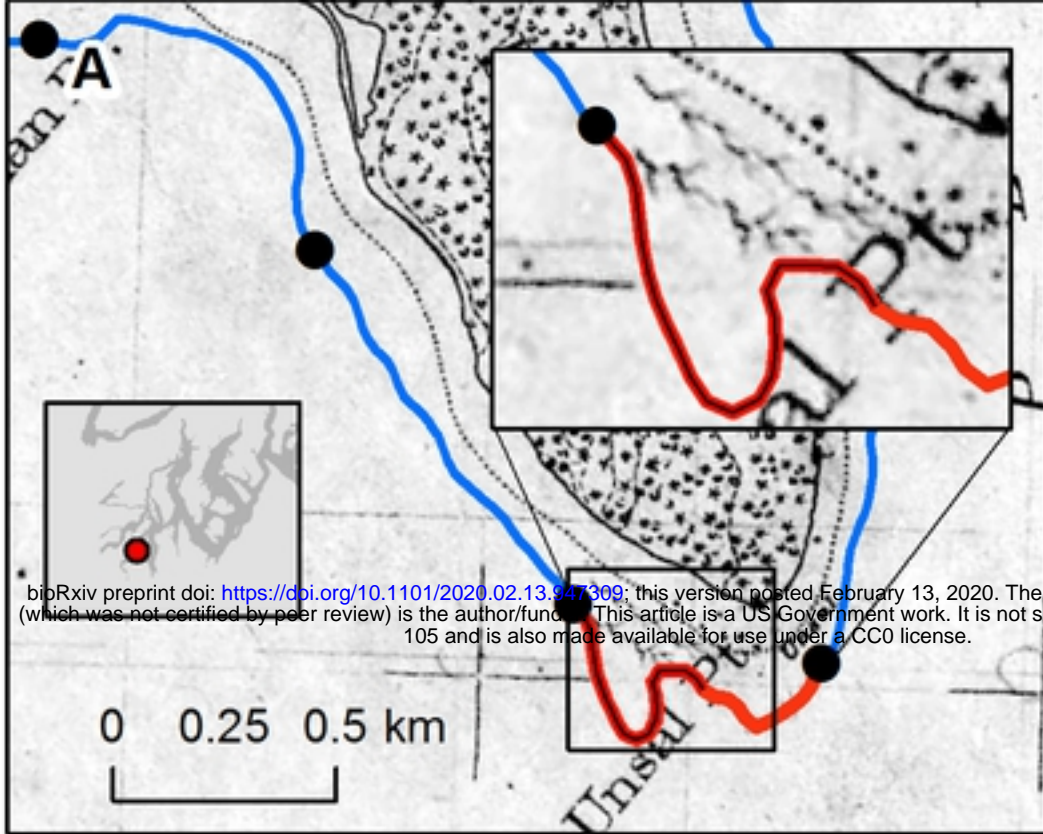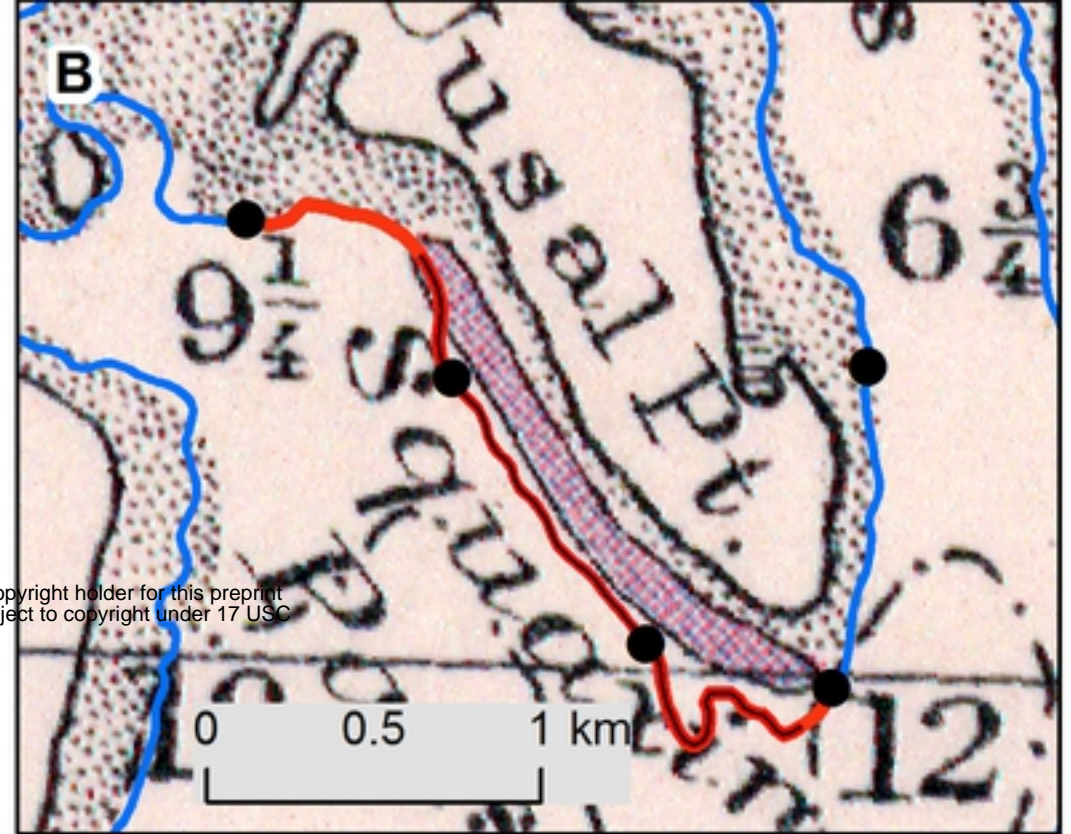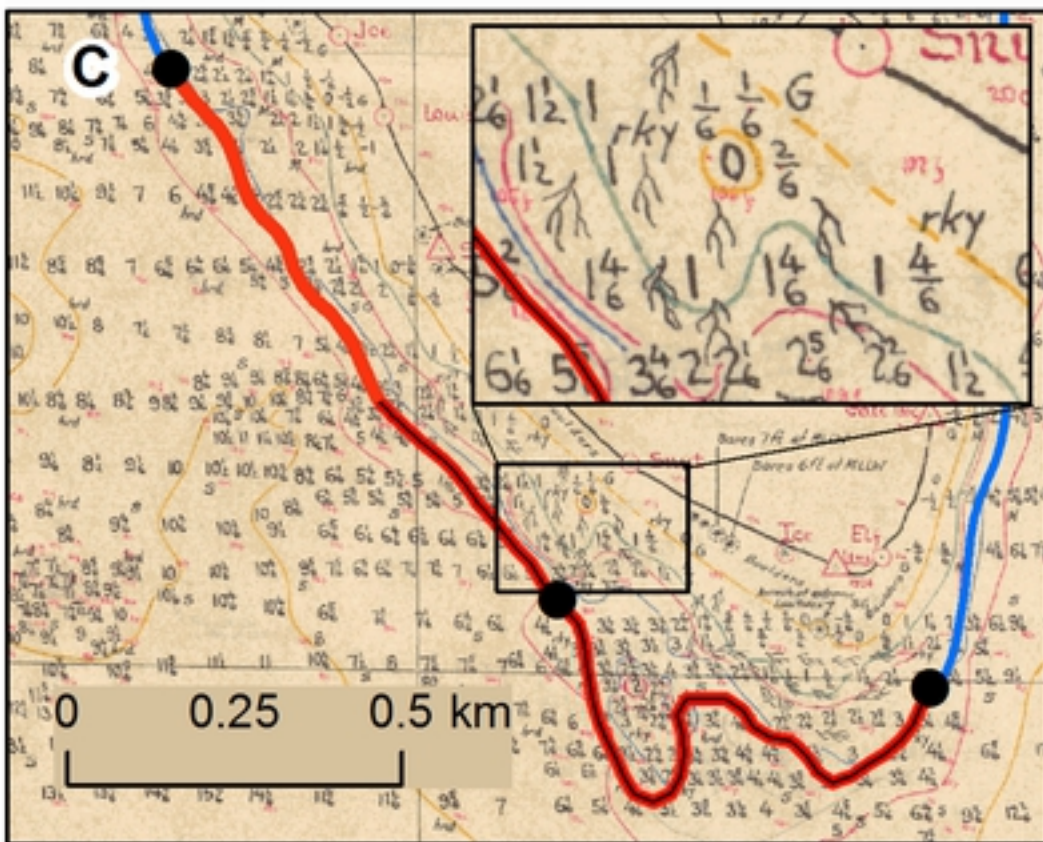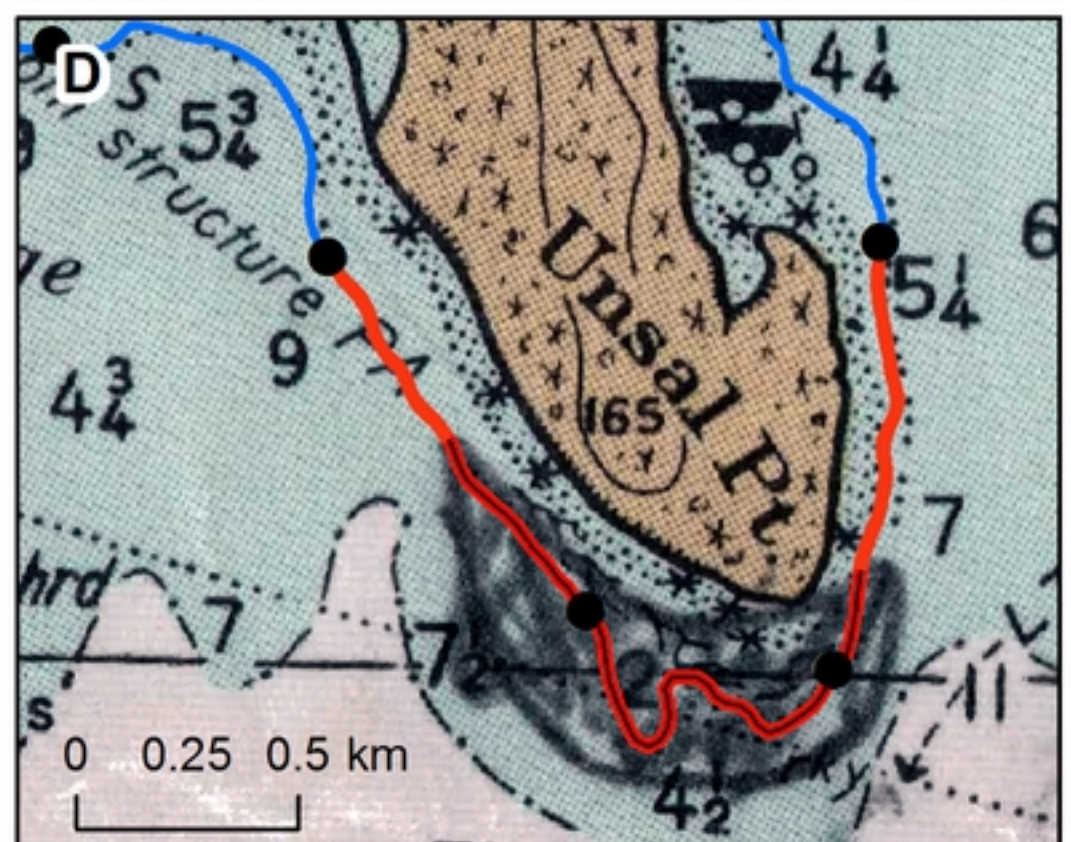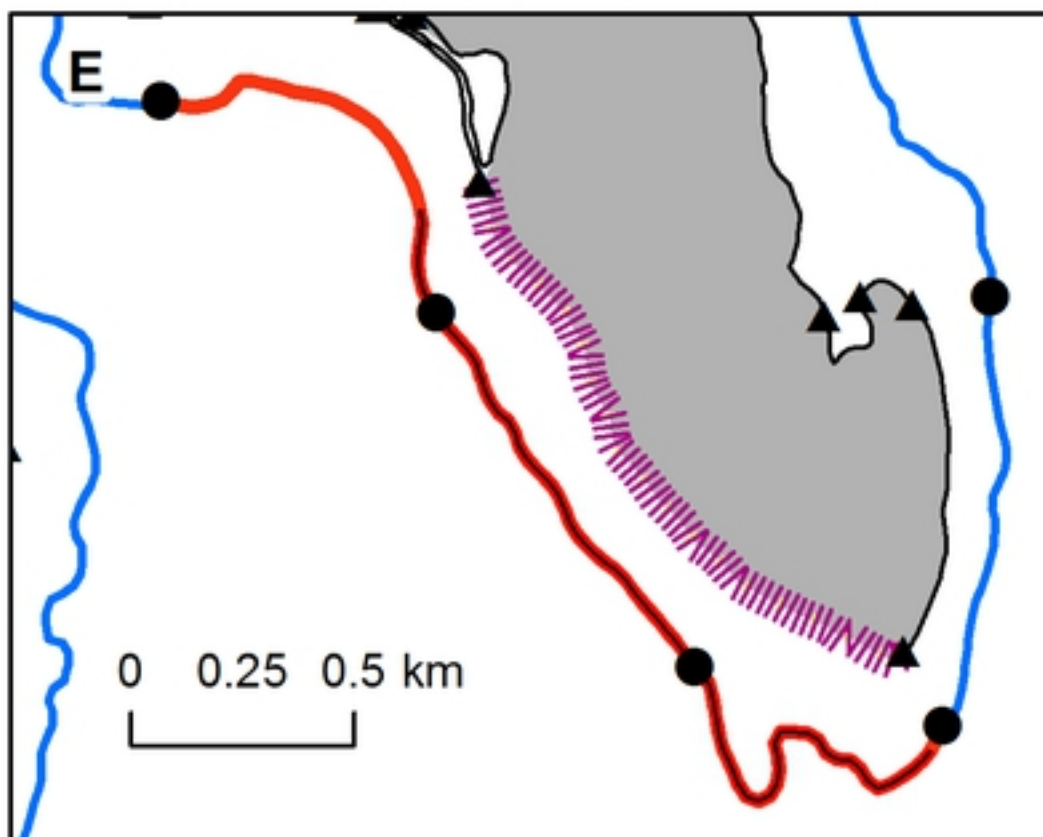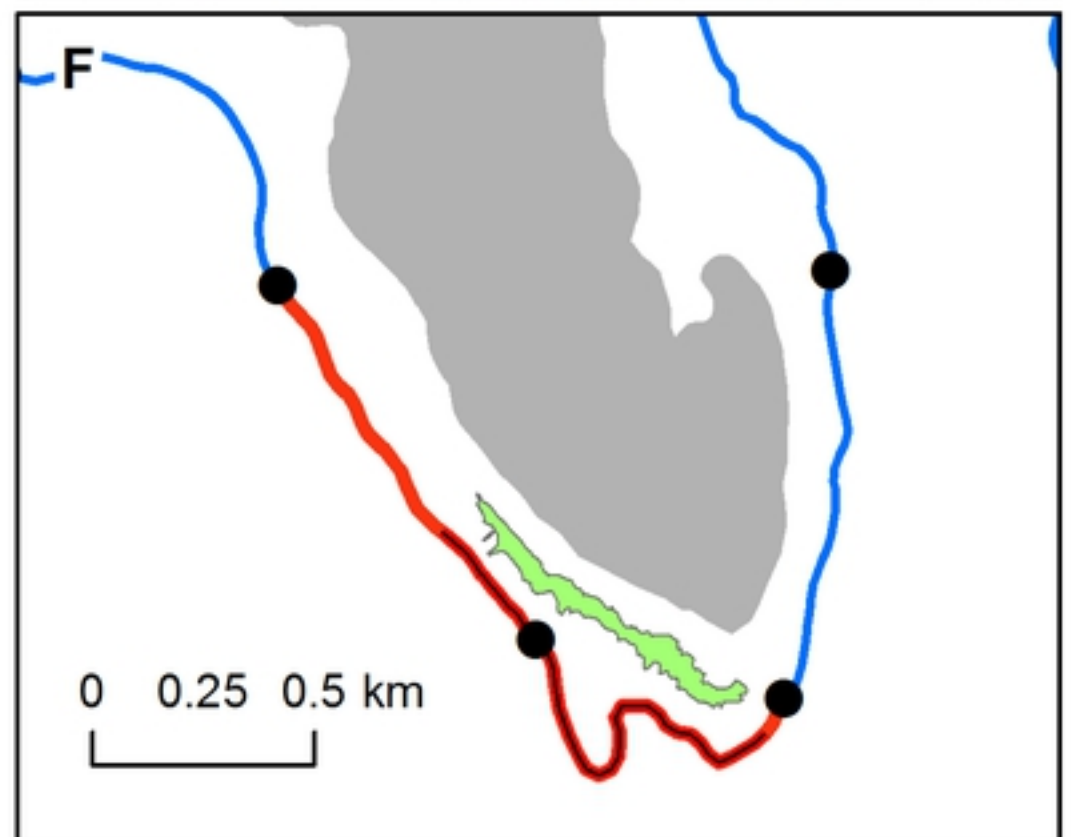

bioRxiv preprint doi: <https://doi.org/10.1101/2020.02.13.947309>; this version posted February 13, 2020. The copyright holder for this preprint (which was not certified by peer review) is the author/funder. This article is a US Government work. It is not subject to copyright under 17 USC 105 and is also made available for use under a CC0 license.

figure 2

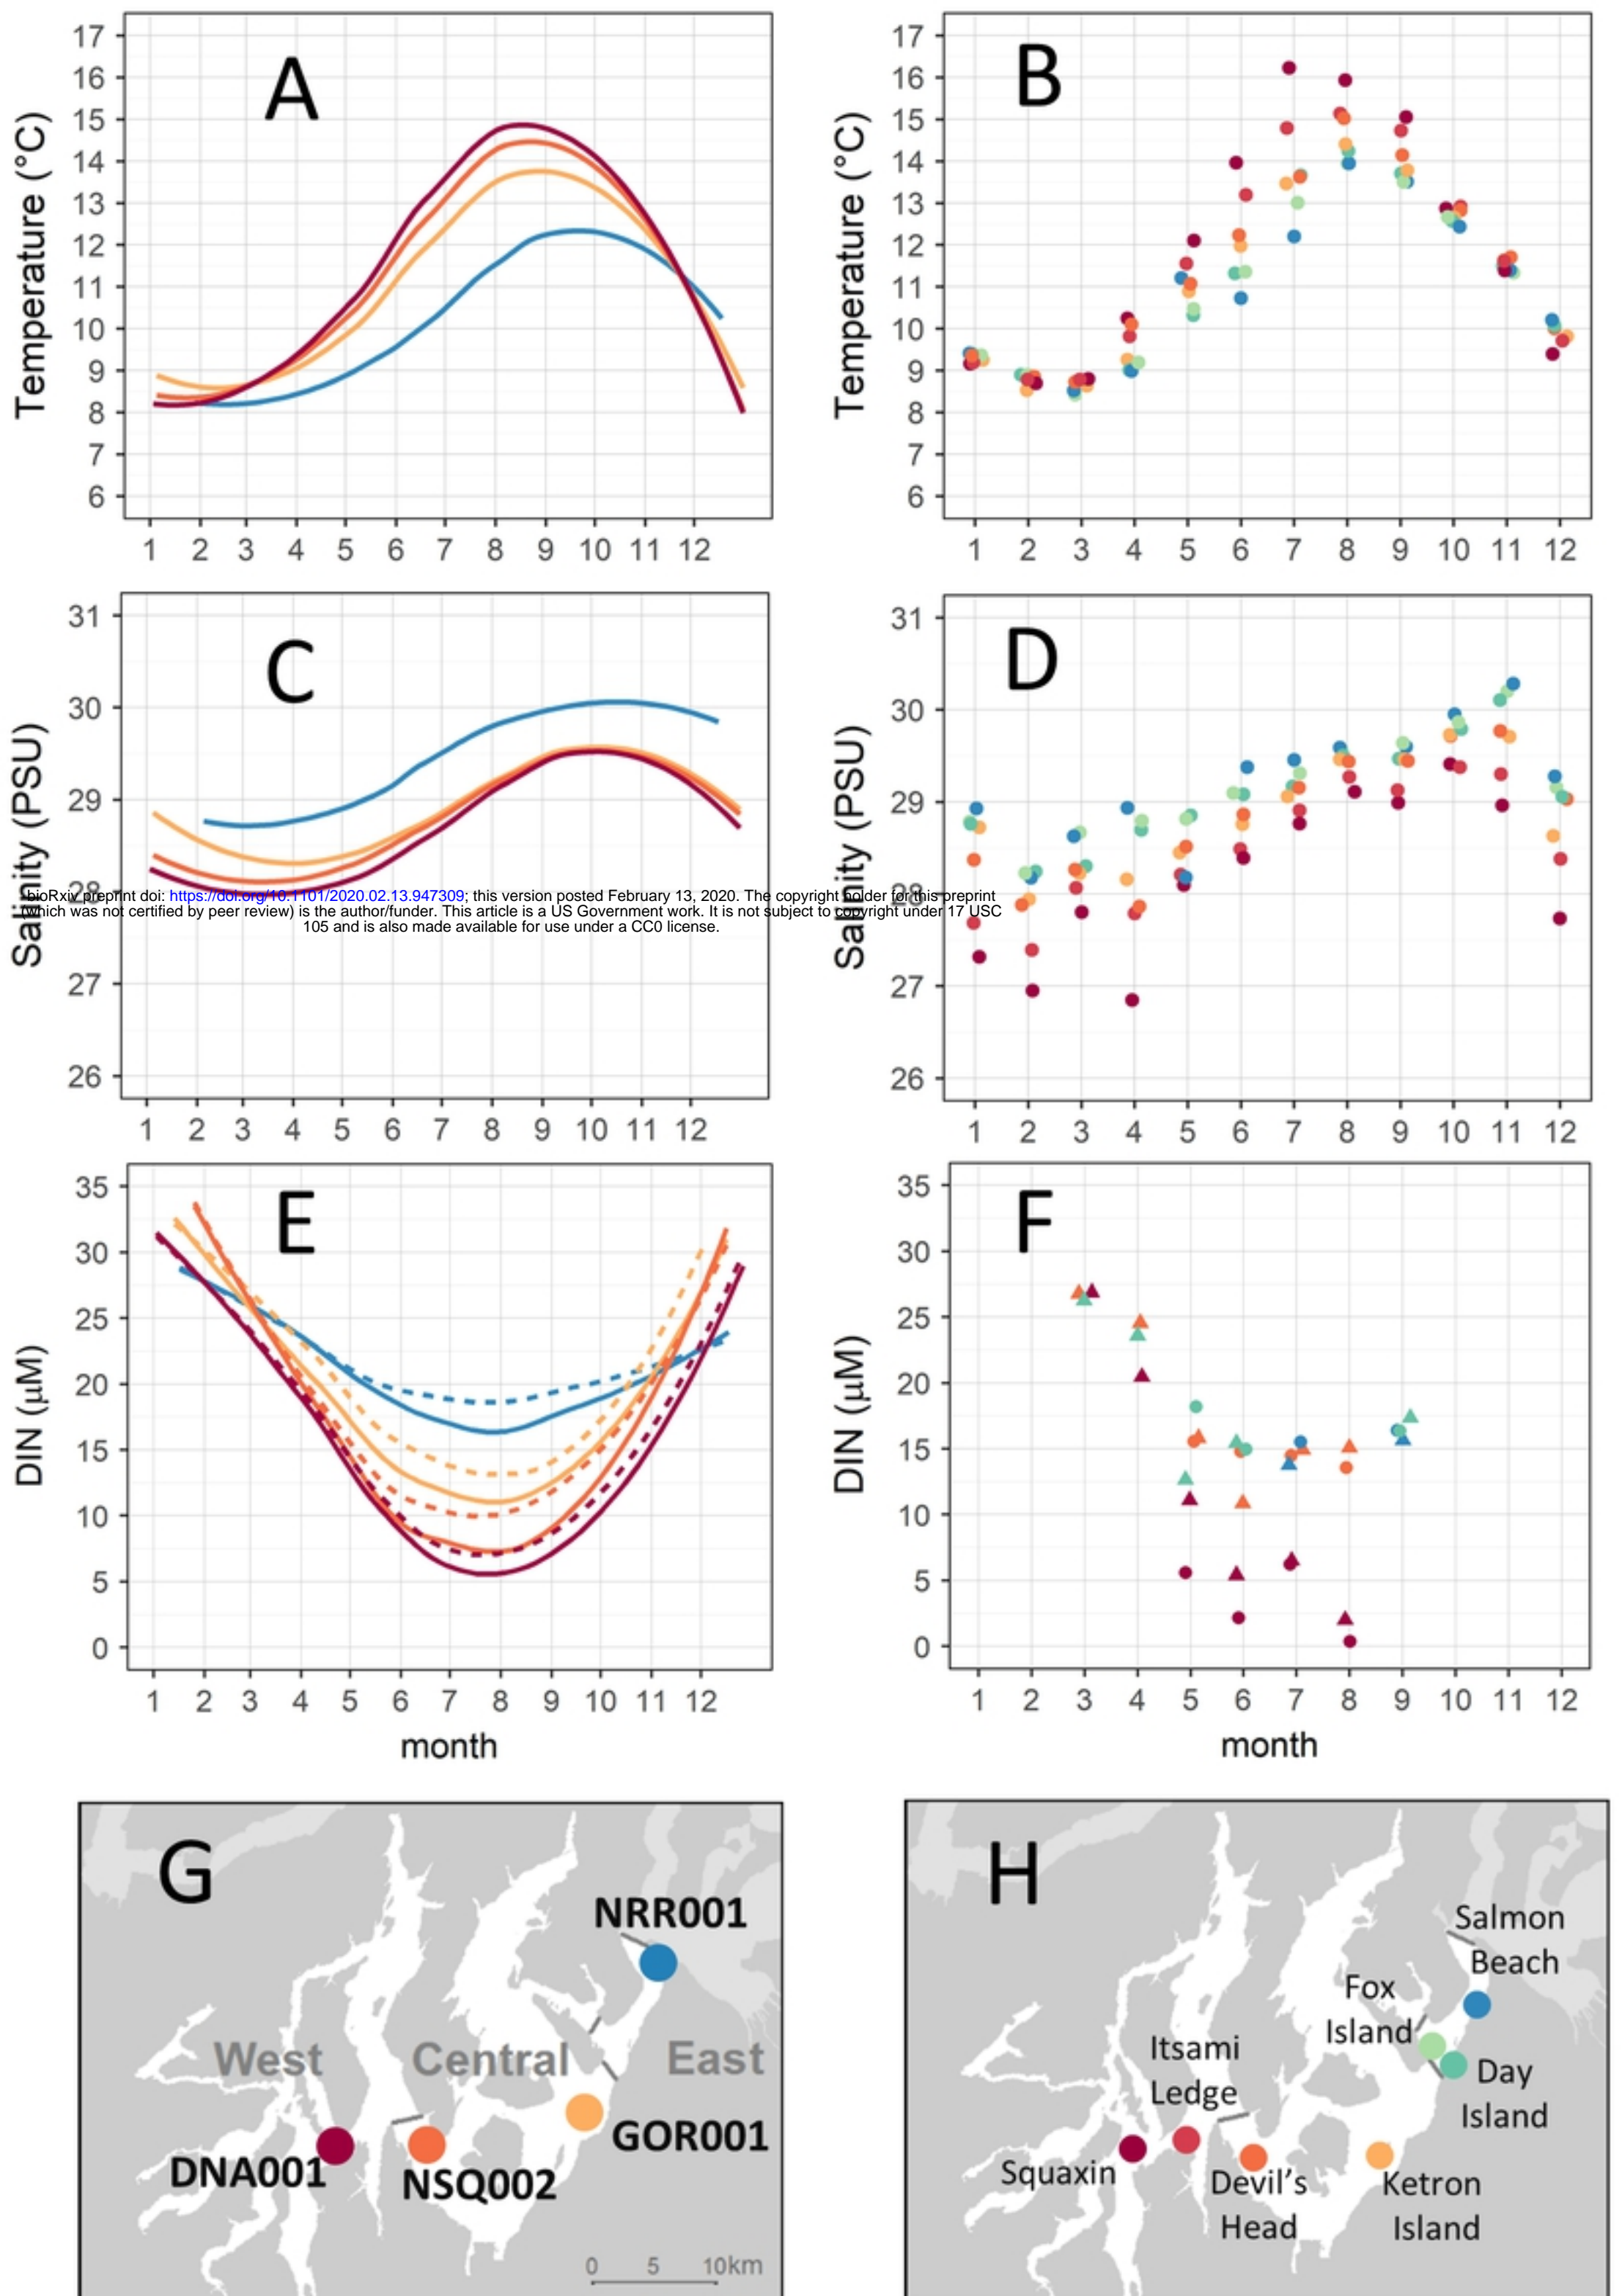

figure 3

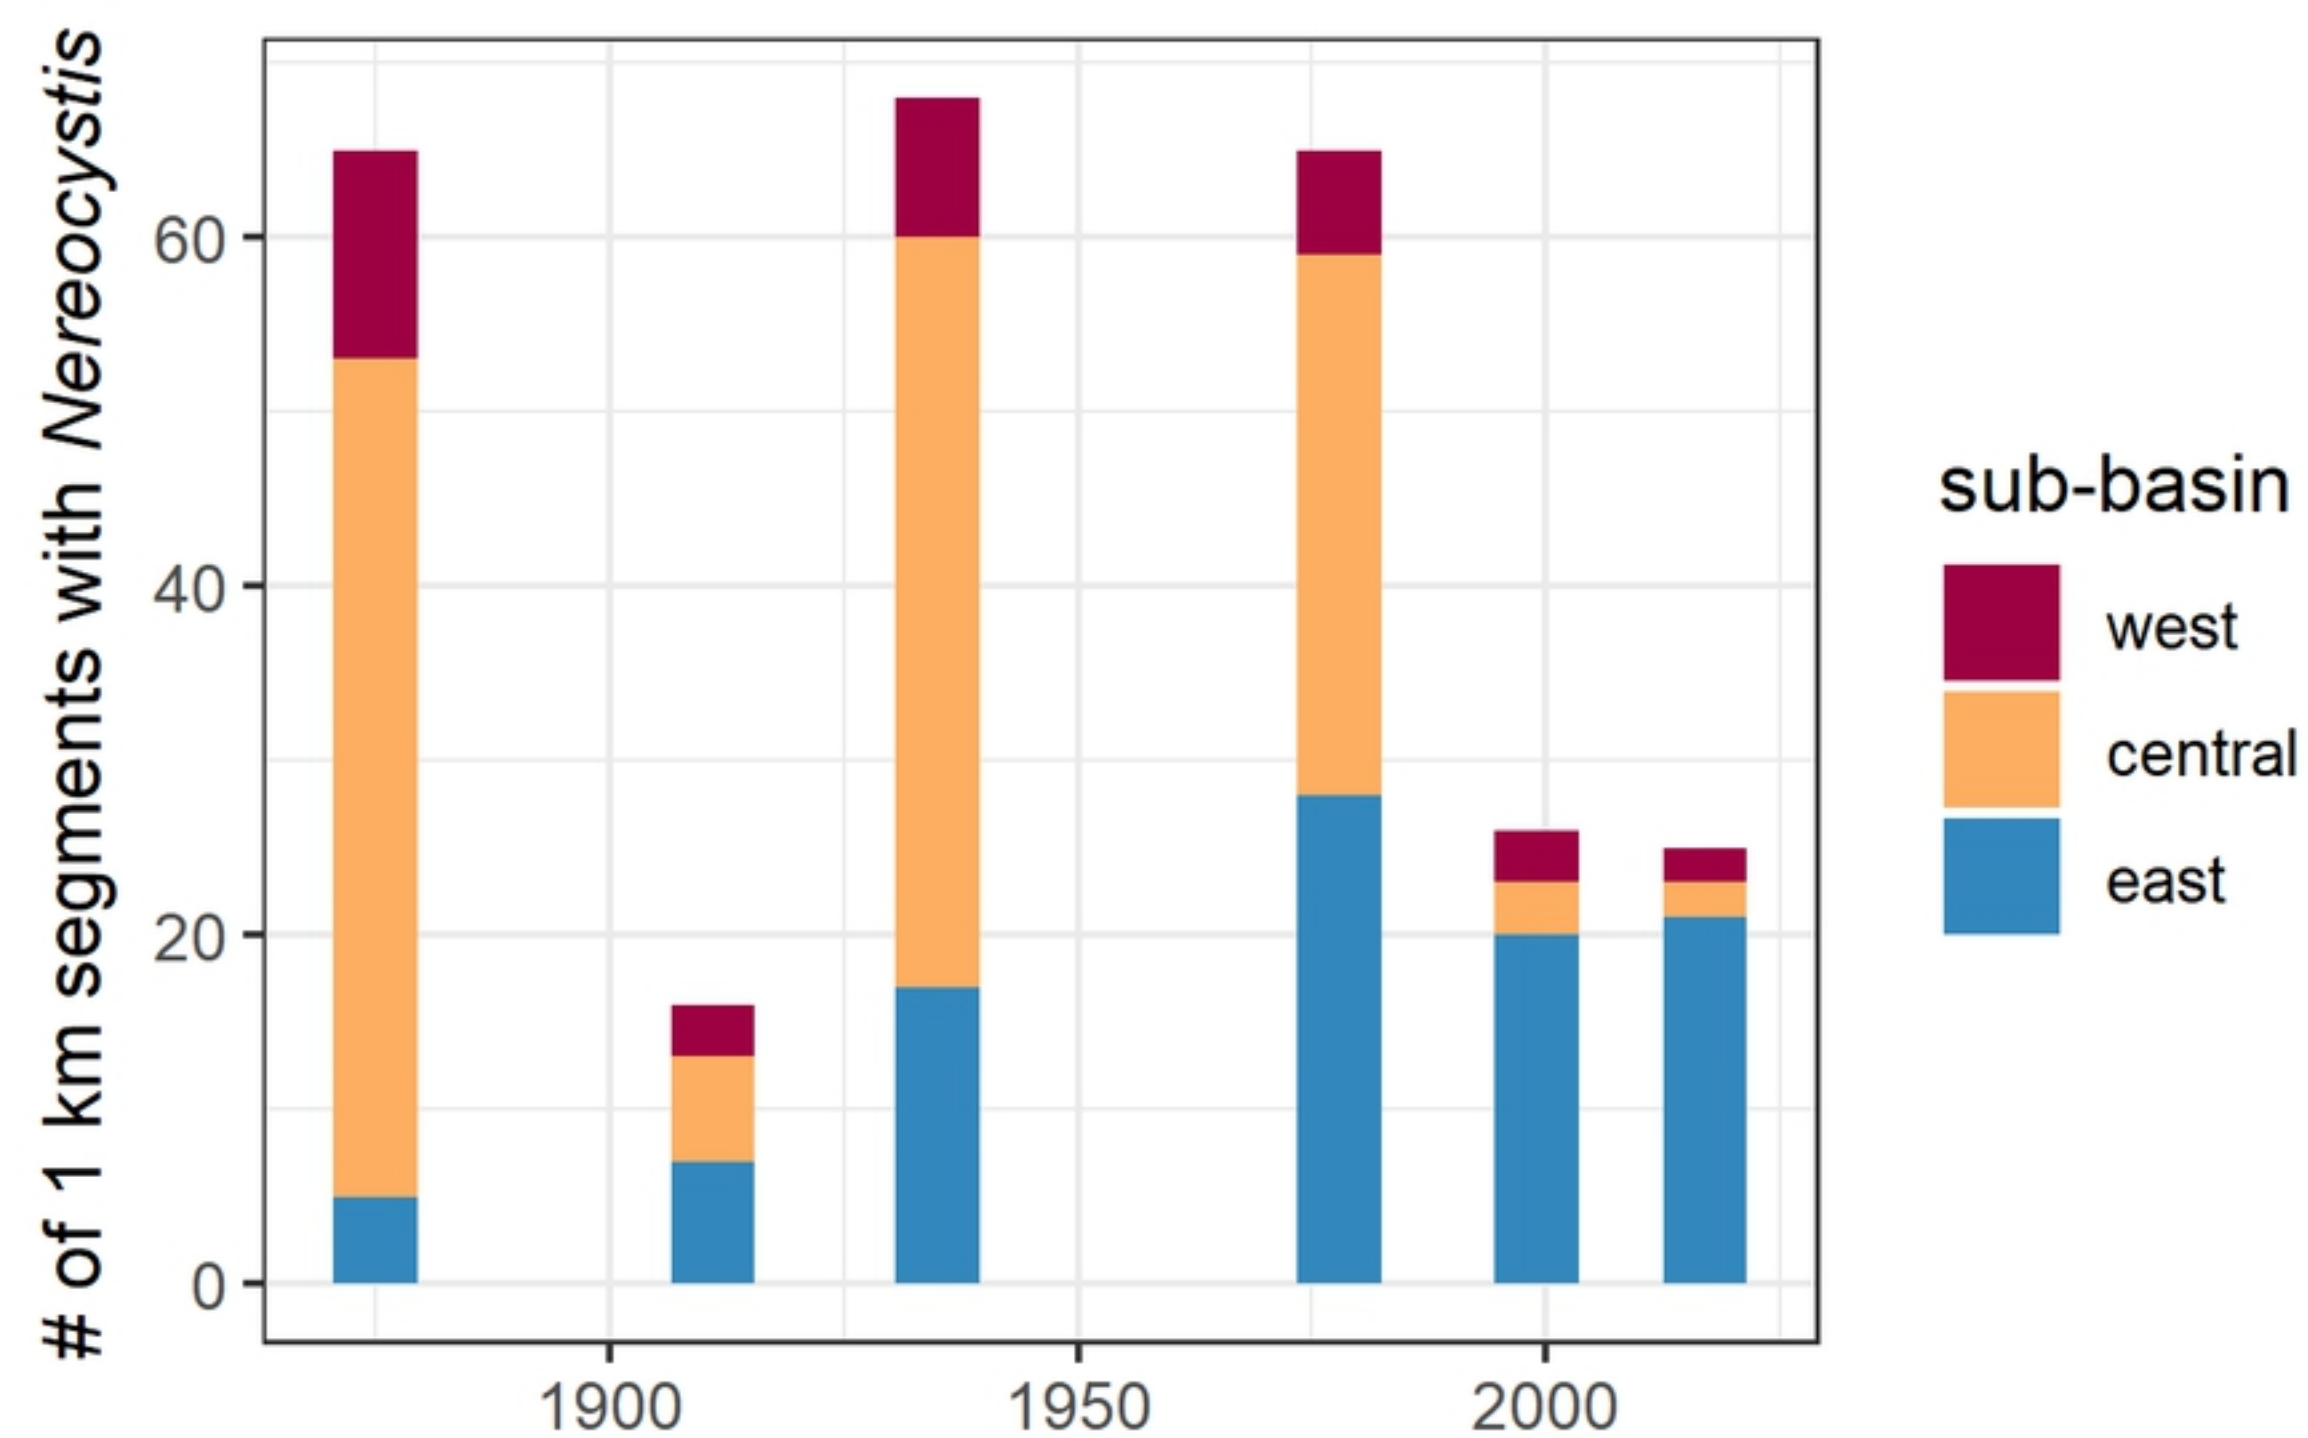

figure 4

Sub-basin

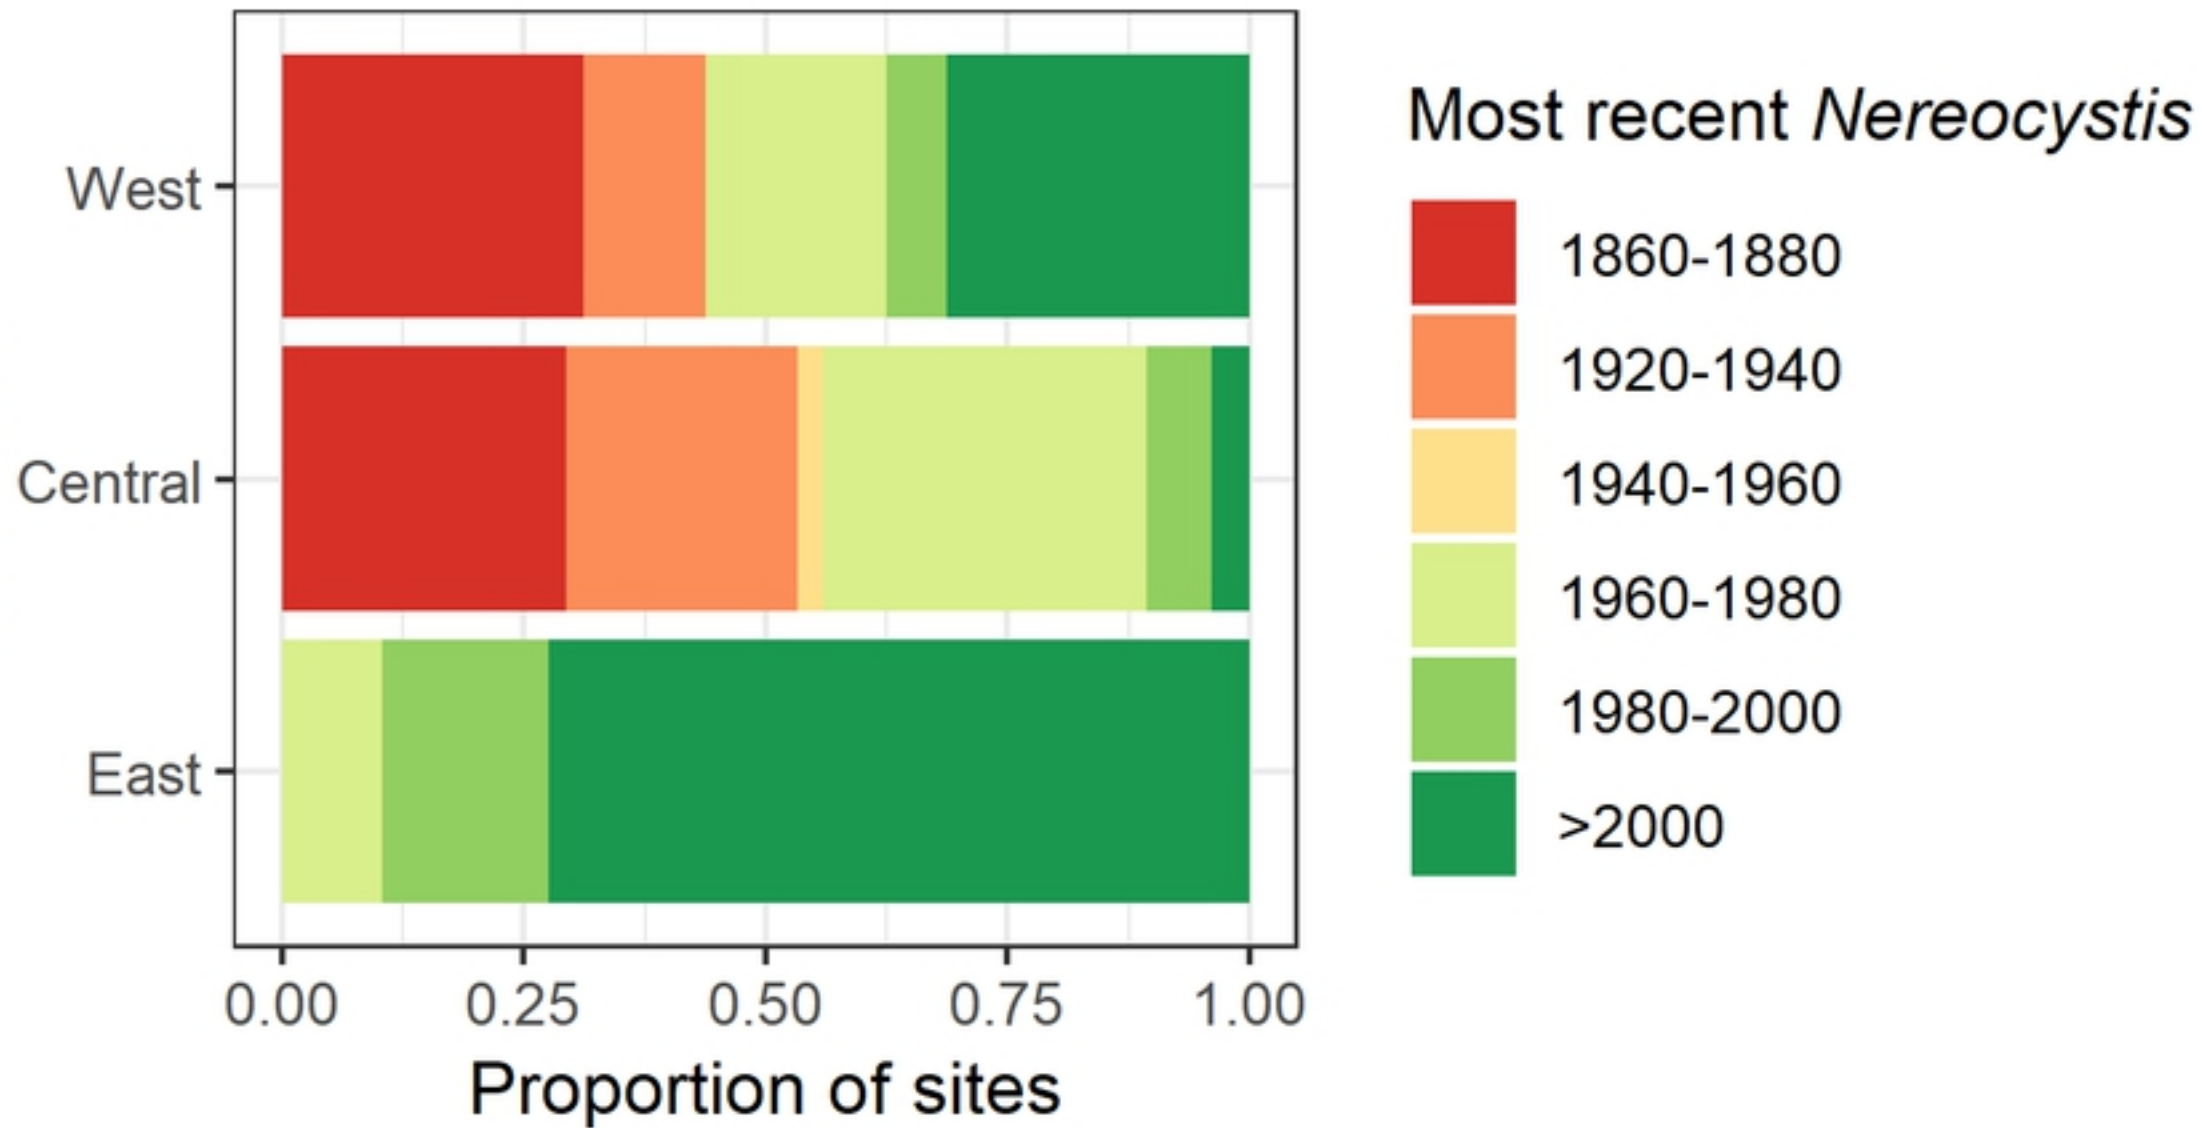

figure 5



A. Before 1980

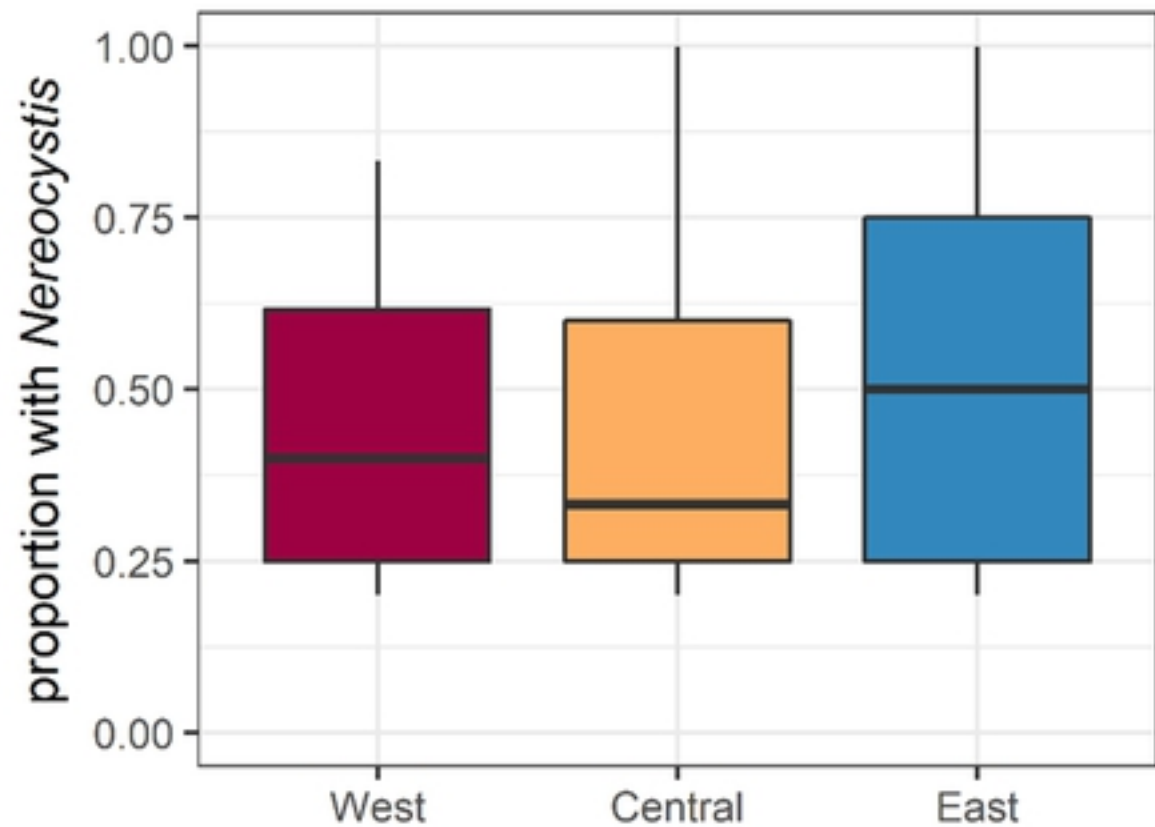

B. After 1980

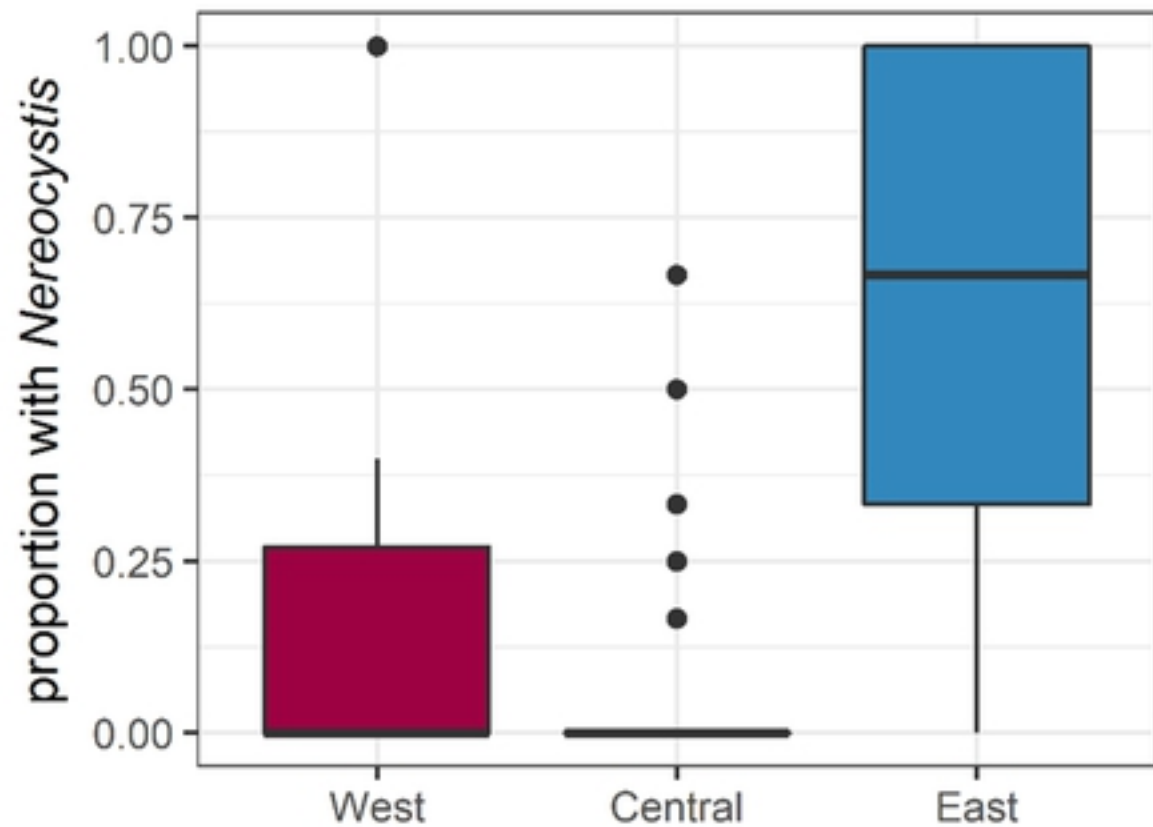

figure 6

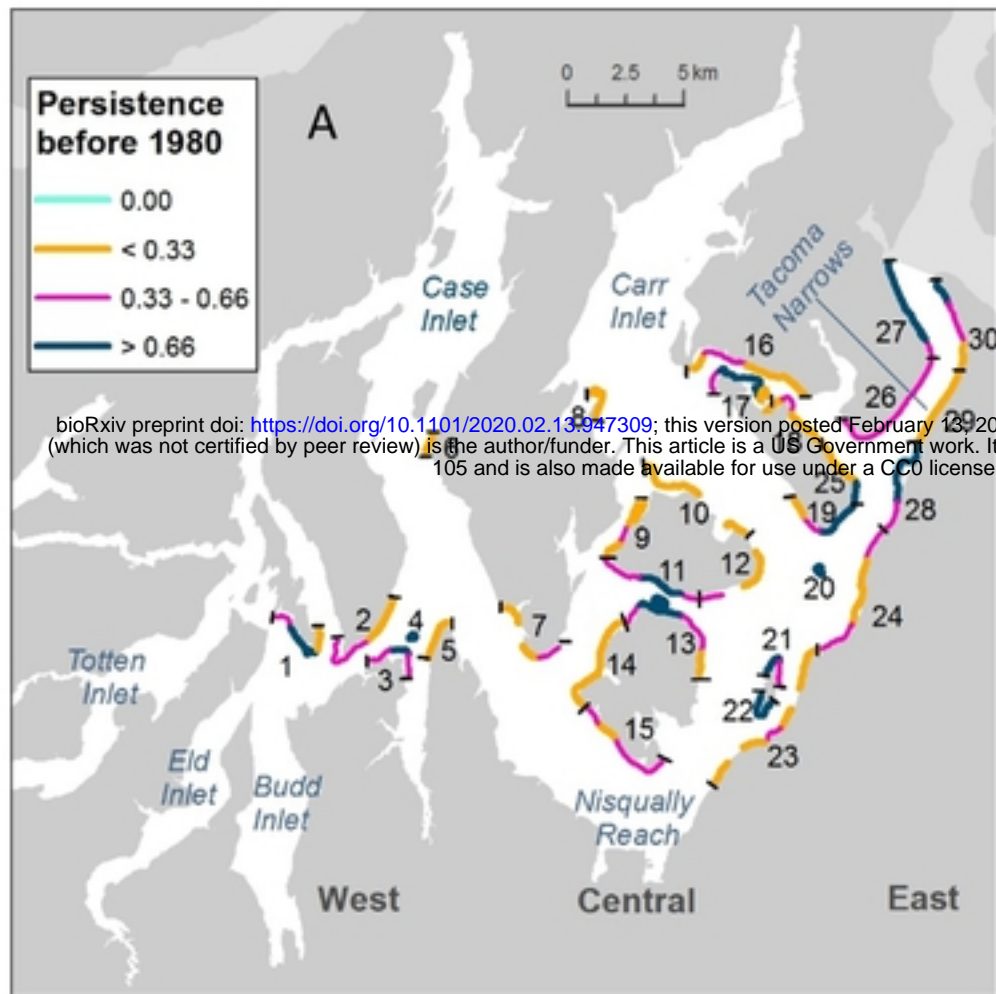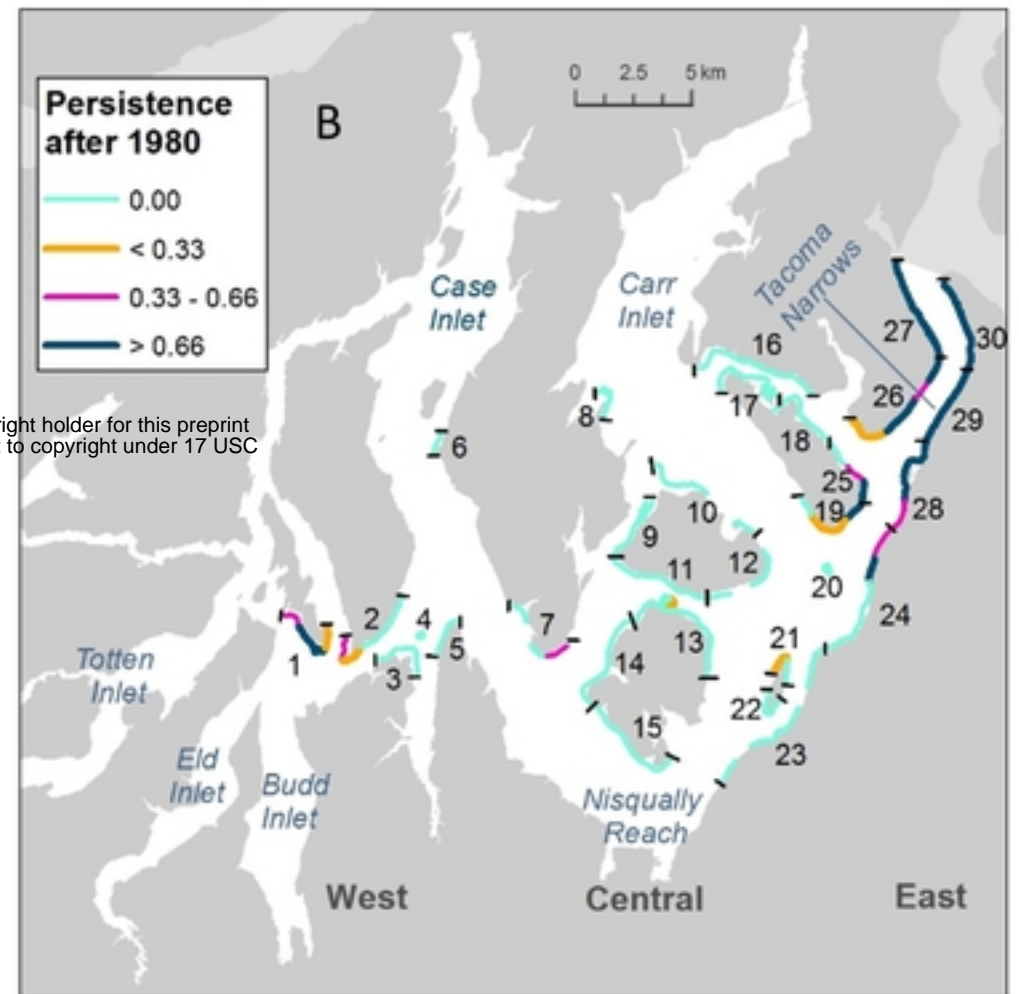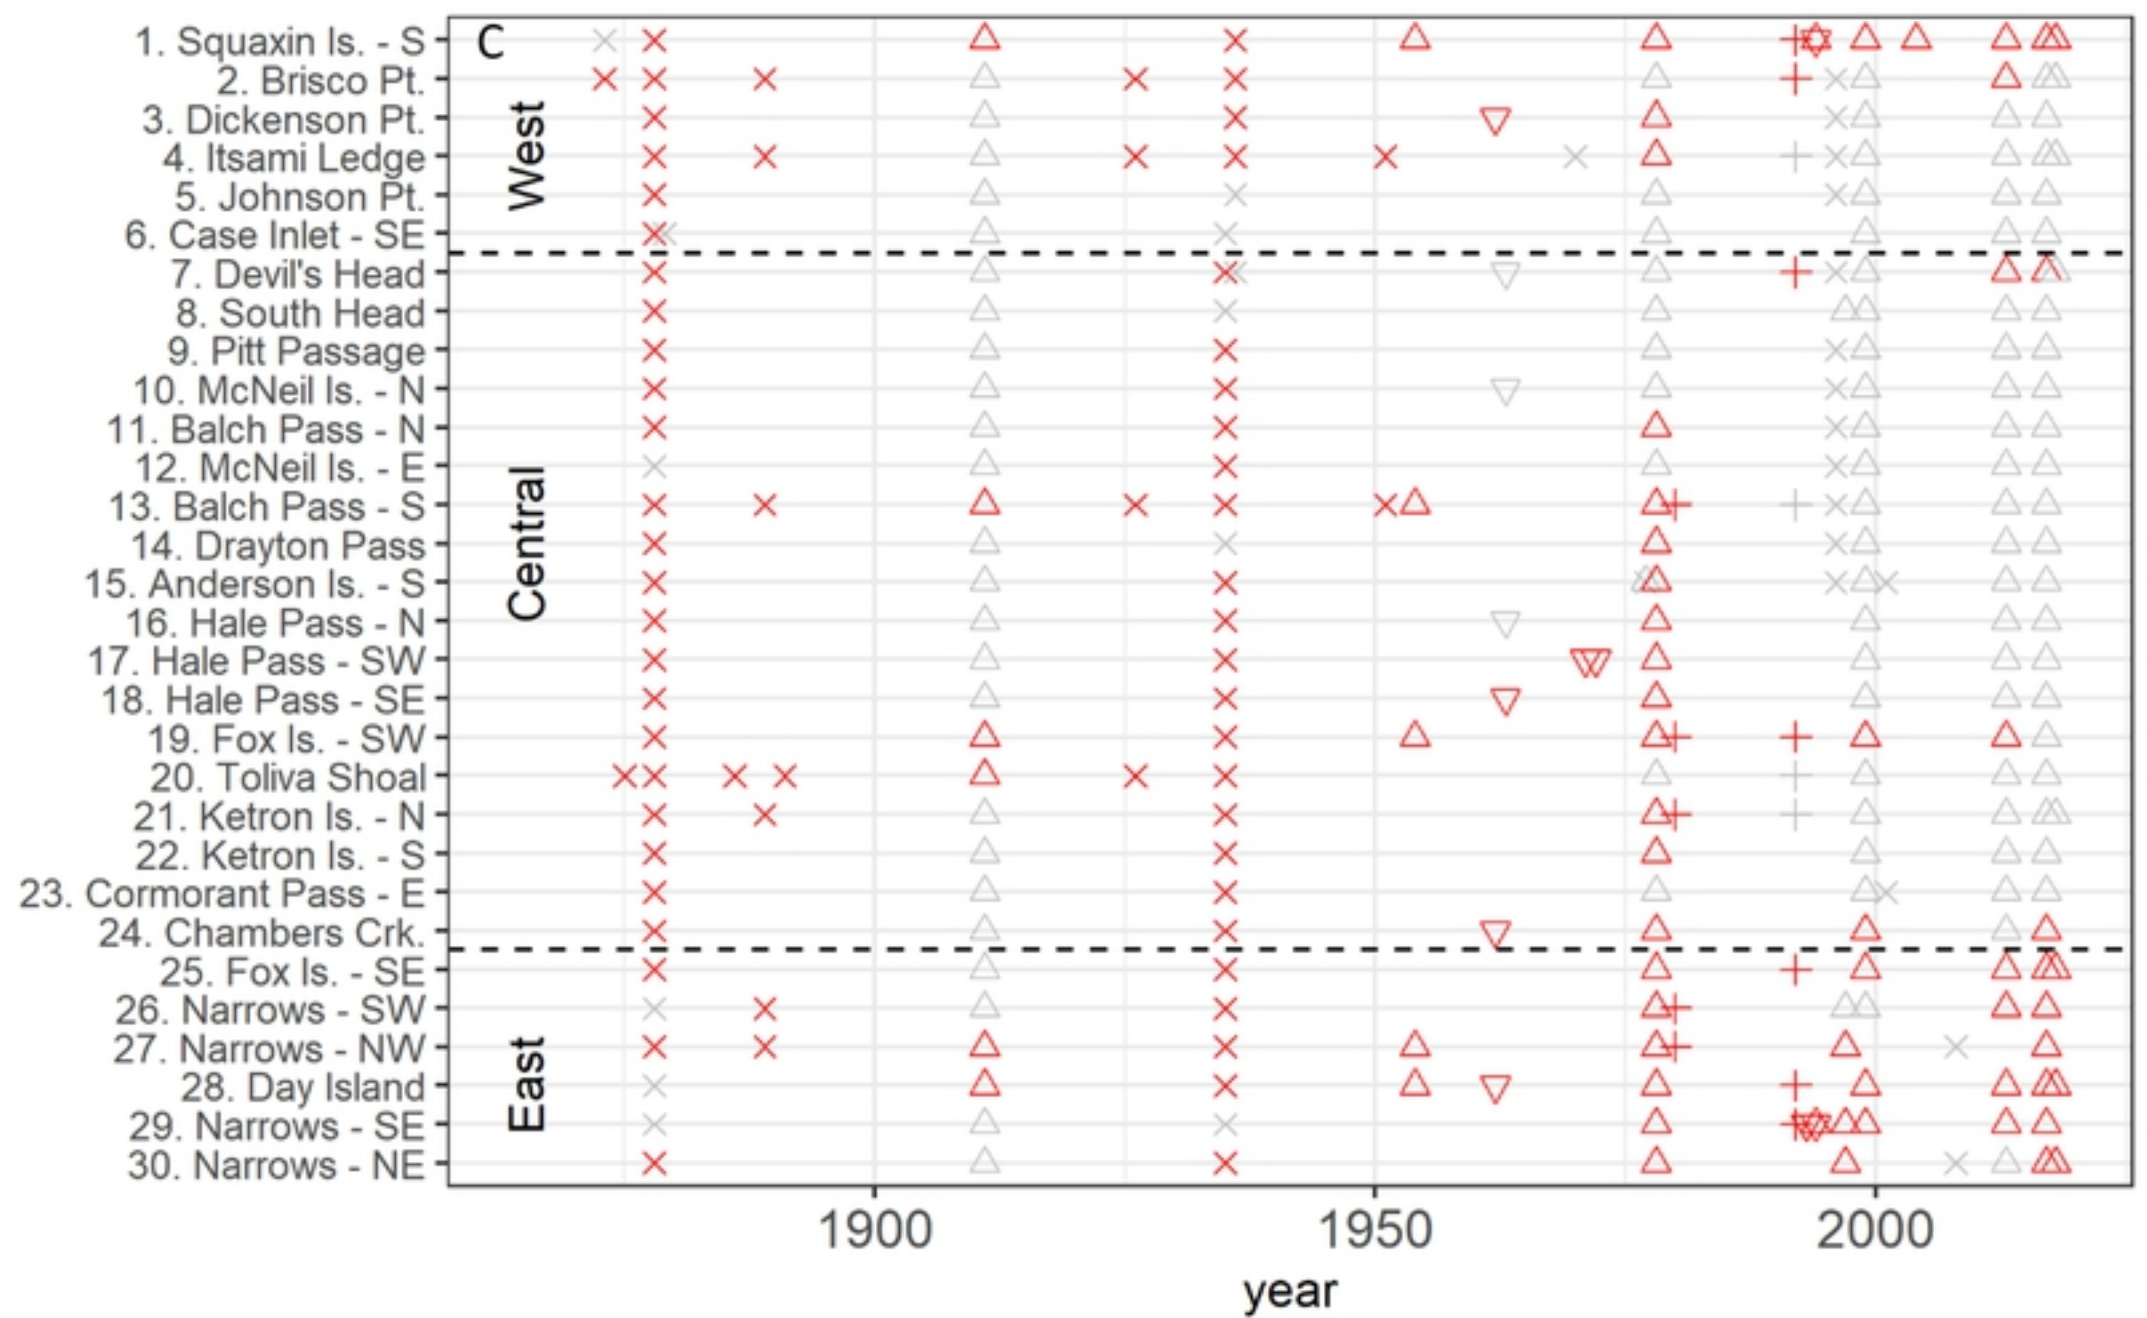

figure 7

bioRxiv preprint doi: <https://doi.org/10.1101/2020.02.13.947309>; this version posted February 13, 2020. The copyright holder for this preprint (which was not certified by peer review) is the author/funder. This article is a US Government work. It is not subject to copyright under 17 USC 105 and is also made available for use under a CC0 license.

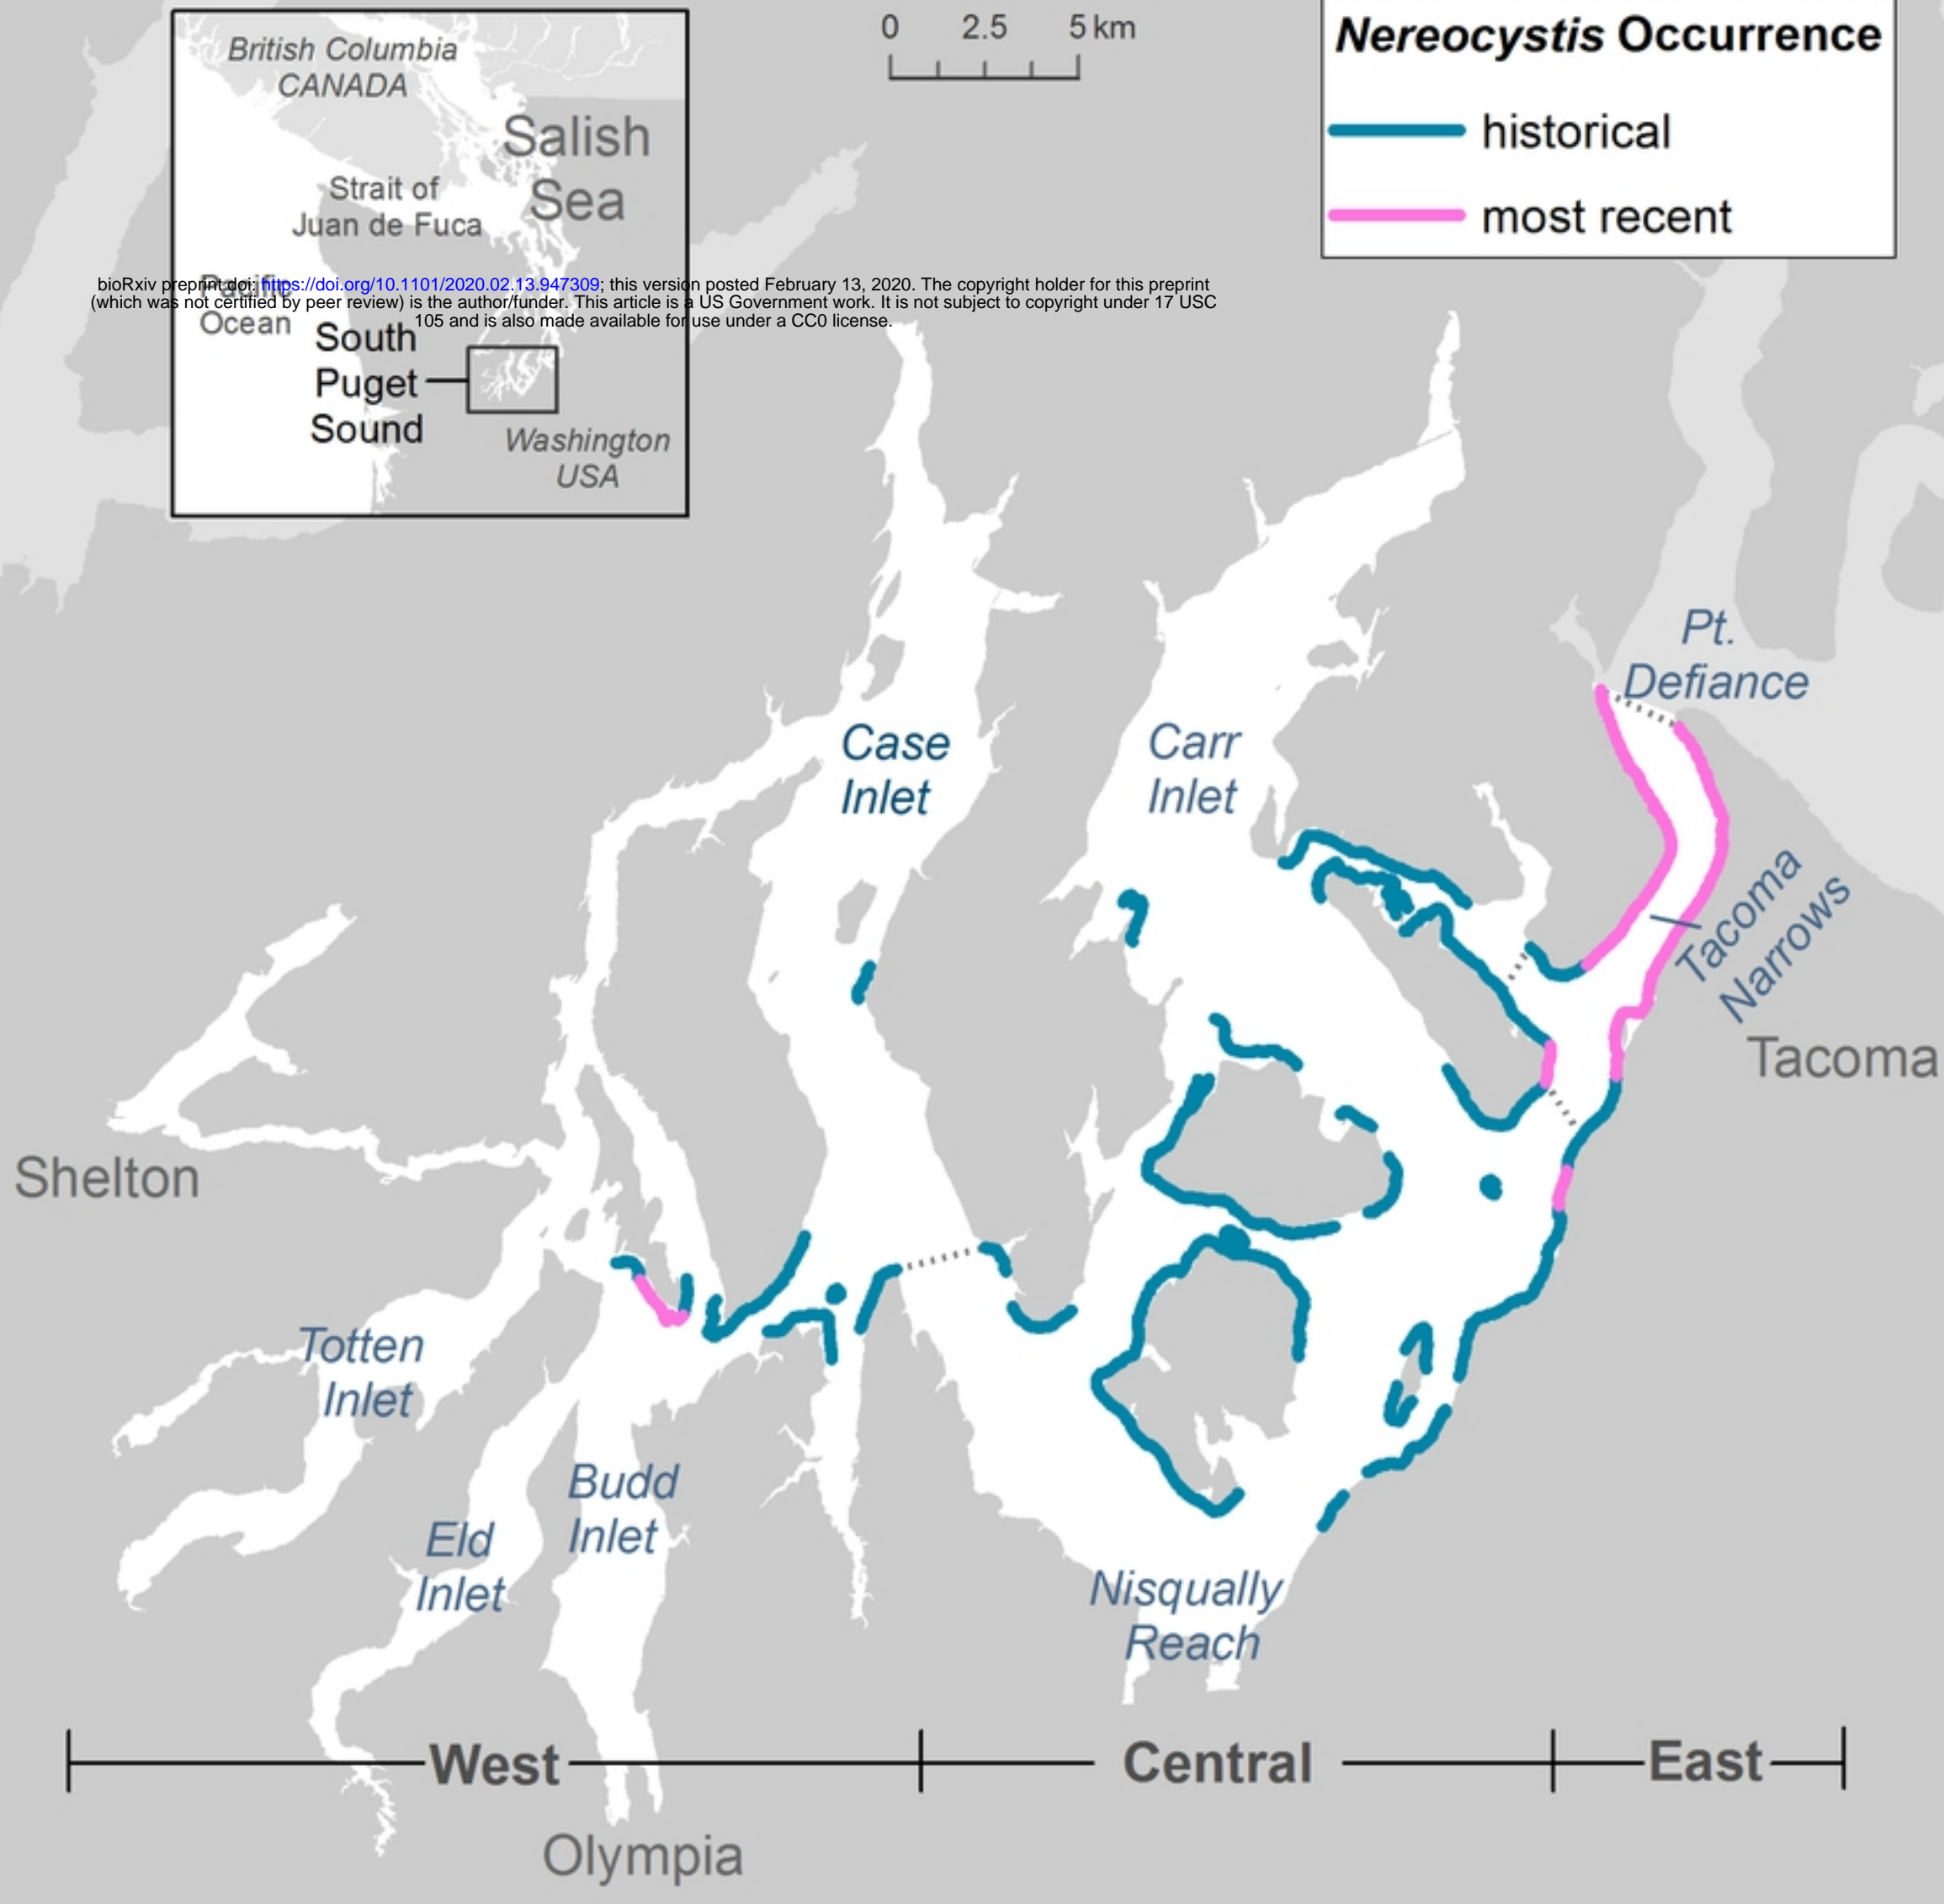

figure 8

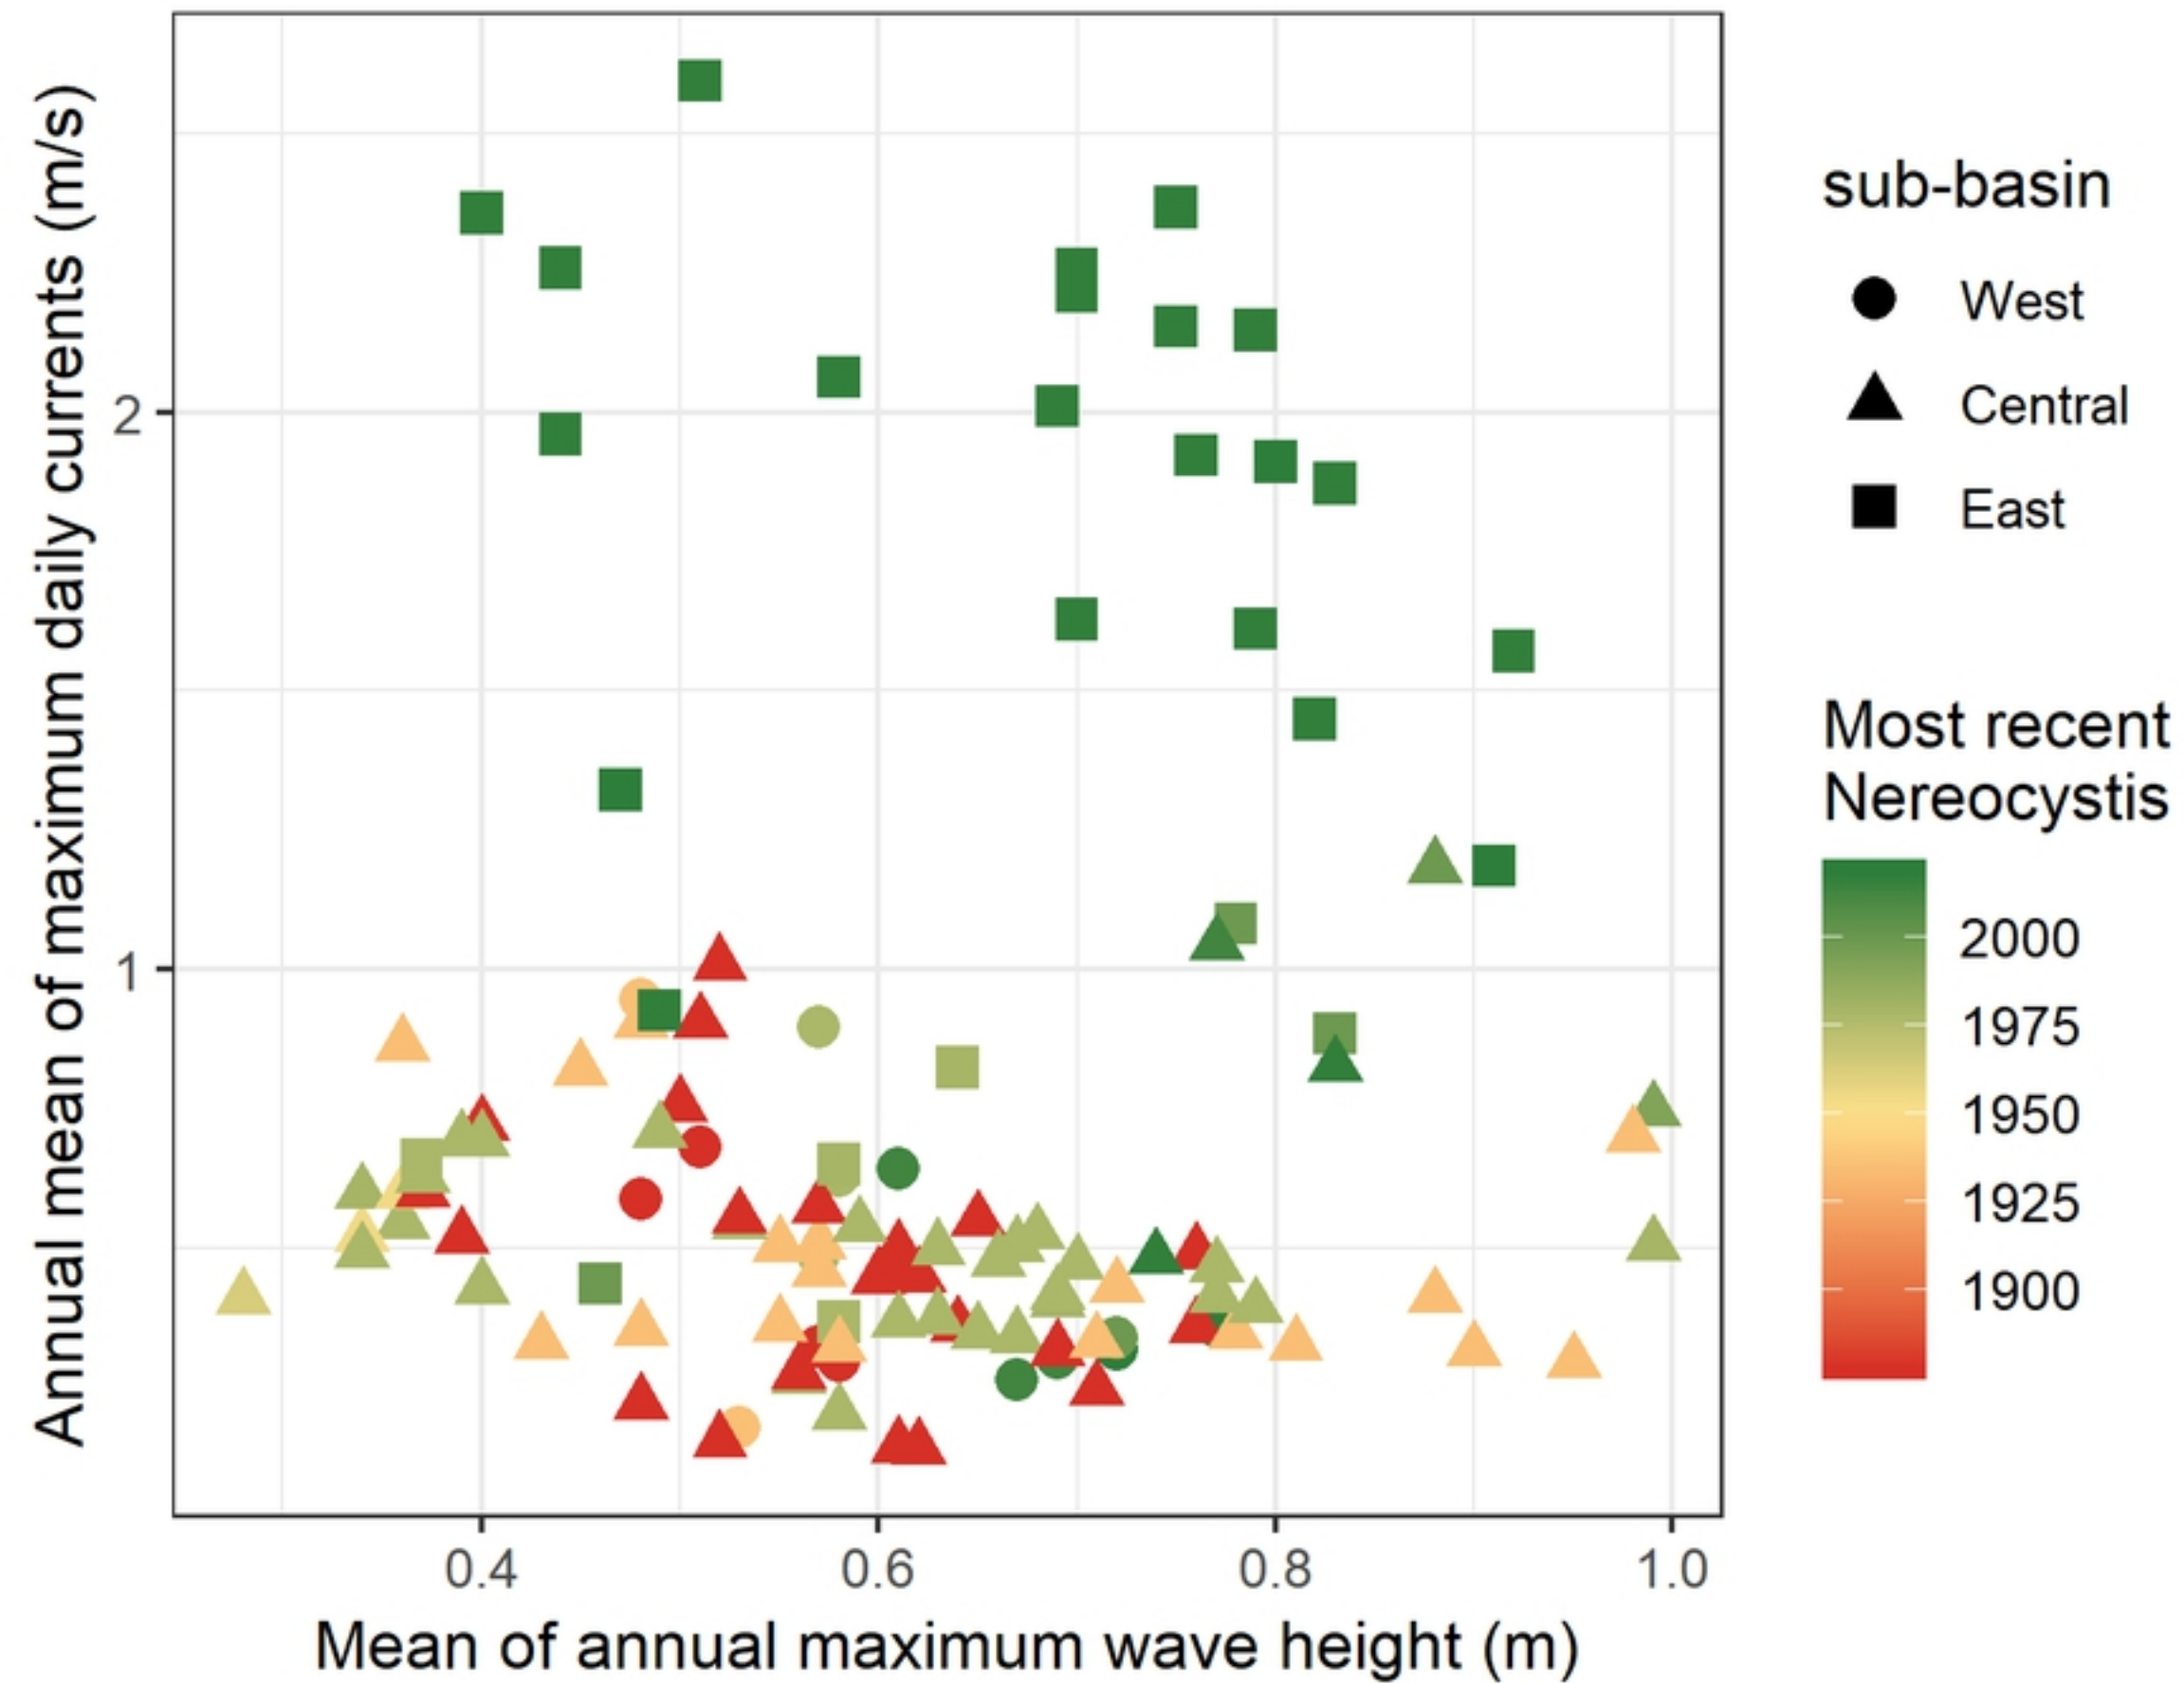

figure 9
